# Supplementary material for: Divergence of Mammalian Higher Order Chromatin Structure Is Associated with Developmental Loci
Source: PLoS Comput Biol. 2013 Apr 4;9(4):e1003017. doi: 10.1371/journal.pcbi.1003017 (PMC3617018; doi:10.1371/journal.pcbi.1003017)
Supplement: Table S3 — Full divergent region details. All divergent orthologous regions discovered. (XLS) [file pcbi.1003017.s010.xls]

## Sheet: HUMAN DIVERGENT 100KB REGIONS
Chr	Start	End	Mean Normalised Chromatin Structure	SAM divergence score	Genes
chr1	111300000	111399999	-0.28708	-3.7645	ENSG00000199710 ENSG00000237415 ENSG00000232791
chr1	111400000	111499999	-0.18407	-4.55866	ENSG00000143119 ENSG00000232811 ENSG00000121931
chr1	115100000	115199999	0.350951	4.79572	ENSG00000116752 ENSG00000175984
chr1	115200000	115299999	0.294667	6.72696	ENSG00000116748 ENSG00000242769 ENSG00000213281 ENSG00000009307 ENSG00000201900
chr1	115300000	115399999	-0.230585	4.9347	ENSG00000052723 ENSG00000227970
chr1	115600000	115699999	-0.667286	6.72312	ENSG00000134198 ENSG00000233730
chr1	115900000	115999999	-0.551146	4.25577
chr1	116100000	116199999	-0.25618	6.63256	ENSG00000232185 ENSG00000239984 ENSG00000207502
chr1	116200000	116299999	-0.152417	6.76986	ENSG00000173218 ENSG00000118729
chr1	116300000	116399999	-0.0123438	5.7178	ENSG00000177551 ENSG00000214204
chr1	116400000	116499999	-0.0238281	4.0054	ENSG00000228127
chr1	116600000	116699999	-0.110718	4.98022	ENSG00000173212
chr1	116700000	116799999	-0.38486	5.14414	ENSG00000235933 ENSG00000241538
chr1	116800000	116899999	-0.298633	5.16113	ENSG00000221040
chr1	116900000	116999999	0.0438753	5.15853	ENSG00000163399 ENSG00000229895 ENSG00000203865 ENSG00000212385 ENSG00000233154 ENSG00000200547
chr1	119700000	119799999	0.145993	-4.88407	ENSG00000231365 ENSG00000227056
chr1	119800000	119899999	0.313328	-6.51846	ENSG00000238679 ENSG00000227712 ENSG00000232650 ENSG00000194297
chr1	119900000	119999999	0.405478	-7.34254	ENSG00000116882 ENSG00000230921 ENSG00000203859 ENSG00000232780 ENSG00000203858
chr1	13900000	13999999	-0.429715	3.75123	ENSG00000162493 ENSG00000222952 ENSG00000237445
chr1	14200000	14299999	-0.636335	4.05005
chr1	14800000	14899999	0.531302	-3.92418
chr1	153200000	153299999	0.336116	-5.62817	ENSG00000203782 ENSG00000159527
chr1	160600000	160699999	0.924736	-4.78446	ENSG00000235101 ENSG00000228863 ENSG00000117091 ENSG00000227239
chr1	160700000	160799999	0.916167	-4.83442	ENSG00000026751 ENSG00000122224
chr1	165300000	165399999	-0.561217	4.32446	ENSG00000143171
chr1	166100000	166199999	-0.761162	4.41965	ENSG00000230898 ENSG00000215952
chr1	167800000	167899999	1.29017	-4.55594	ENSG00000143199 ENSG00000143158
chr1	167900000	167999999	1.02834	-3.87413	ENSG00000143164 ENSG00000221545
chr1	168000000	168099999	1.14807	-4.89745	ENSG00000224837 ENSG00000235471 ENSG00000143147
chr1	178700000	178799999	0.31952	4.60578	ENSG00000228196 ENSG00000201791
chr1	178800000	178899999	0.321952	3.90969	ENSG00000116194
chr1	178900000	178999999	0.485913	4.8061
chr1	179100000	179199999	0.315615	4.83873	ENSG00000143322 ENSG00000234041 ENSG00000231905 ENSG00000212338 ENSG00000201619 ENSG00000231564 ENSG00000225711
chr1	179200000	179299999	0.155797	5.33593	ENSG00000223794 ENSG00000228191 ENSG00000057252
chr1	179300000	179399999	-0.0800609	6.025
chr1	182600000	182699999	0.616695	3.92622	ENSG00000135824 ENSG00000227181
chr1	184700000	184799999	0.333194	3.79547	ENSG00000252222
chr1	185000000	185099999	0.195973	4.17491	ENSG00000121481 ENSG00000232792
chr1	185300000	185399999	-0.118683	4.02379
chr1	19200000	19299999	0.891499	4.38098	ENSG00000255275 ENSG00000159423 ENSG00000221662 ENSG00000169991
chr1	192600000	192699999	-0.0615485	-4.09989	ENSG00000127074 ENSG00000231767
chr1	193500000	193599999	-0.79877	-4.03042
chr1	195500000	195599999	-0.482098	-4.35243
chr1	195600000	195699999	-0.296627	-4.91295
chr1	195700000	195799999	-0.252934	-5.2206	ENSG00000251335
chr1	195900000	195999999	-0.260239	-4.07068
chr1	20200000	20299999	0.493324	3.74178	ENSG00000169914 ENSG00000188784 ENSG00000242688
chr1	203300000	203399999	0.911698	4.72954	ENSG00000122176 ENSG00000229652
chr1	20500000	20599999	-0.210733	5.28914	ENSG00000225986 ENSG00000162543 ENSG00000228105
chr1	20600000	20699999	0.056959	4.14829	ENSG00000158816 ENSG00000226664
chr1	211800000	211899999	0.338337	3.87137	ENSG00000228792 ENSG00000227764 ENSG00000222080 ENSG00000224763 ENSG00000117650 ENSG00000231057 ENSG00000244344 ENSG00000226868
chr1	216200000	216299999	-0.226312	-4.99771	ENSG00000233620
chr1	216300000	216399999	-0.217001	-6.17223	ENSG00000236292 ENSG00000226013
chr1	216500000	216599999	-0.553937	-3.77791
chr1	218000000	218099999	-1.05272	4.19581	ENSG00000228247 ENSG00000231814
chr1	218300000	218399999	-0.968003	3.8533	ENSG00000201493
chr1	218400000	218499999	-0.835426	4.6585	ENSG00000067533 ENSG00000229016
chr1	220900000	220999999	-0.111156	5.02292	ENSG00000117791 ENSG00000186205 ENSG00000221571
chr1	221000000	221099999	-0.390519	4.51174	ENSG00000238078 ENSG00000257551 ENSG00000136630
chr1	223600000	223699999	-0.00226828	3.861
chr1	223800000	223899999	0.548958	4.7796	ENSG00000227002 ENSG00000212398
chr1	226800000	226899999	0.965237	4.05859	ENSG00000143772 ENSG00000228382 ENSG00000228548
chr1	227900000	227999999	0.190897	8.3471	ENSG00000143740 ENSG00000081692 ENSG00000230005
chr1	228200000	228299999	0.447373	6.00234	ENSG00000154342 ENSG00000143761 ENSG00000143793 ENSG00000162910
chr1	231300000	231399999	-0.210196	8.49539	ENSG00000119283 ENSG00000235710 ENSG00000143633 ENSG00000116906
chr1	235300000	235399999	1.1684	-6.39002	ENSG00000188739 ENSG00000054267 ENSG00000232686
chr1	235900000	235999999	0.764023	-4.07312	ENSG00000235674 ENSG00000226135
chr1	241300000	241399999	-0.285823	-5.2435
chr1	241500000	241599999	-0.354305	-5.77649	ENSG00000225554
chr1	244600000	244699999	0.828738	-3.75259
chr1	246200000	246299999	-0.567167	4.15292	ENSG00000226876
chr1	246300000	246399999	-0.422015	3.82506	ENSG00000225222 ENSG00000202184
chr1	2800000	2899999	-0.499401	5.72357
chr1	2900000	2999999	-0.546487	5.66034	ENSG00000169717 ENSG00000177133 ENSG00000256761
chr1	3000000	3099999	-0.484287	4.77634	ENSG00000226286
chr1	3100000	3199999	-0.425392	3.98492
chr1	58400000	58499999	-0.153254	-3.71445
chr1	58600000	58699999	0.081818	-3.98857	ENSG00000233216
chr1	58700000	58799999	0.185952	-4.27379
chr1	72400000	72499999	-0.538462	-4.05992
chr1	72500000	72599999	-0.572978	-4.4459
chr1	73200000	73299999	-0.0552486	-5.41018	ENSG00000225087 ENSG00000227016
chr1	73300000	73399999	0.123515	-5.69566
chr1	7400000	7499999	-0.262786	3.88816	ENSG00000237402 ENSG00000237728
chr1	7600000	7699999	0.0830595	5.20533
chr1	7800000	7899999	0.58371	4.59786	ENSG00000049245 ENSG00000049246 ENSG00000236266
chr1	81400000	81499999	-0.254606	-4.87624
chr1	81500000	81599999	0.169023	-5.95123	ENSG00000227937 ENSG00000229752
chr1	81600000	81699999	0.470439	-6.36354	ENSG00000235089
chr1	81700000	81799999	0.432474	-4.24801	ENSG00000223026
chr1	97300000	97399999	-0.376525	-3.76621	ENSG00000212039
chr10	100200000	100299999	-0.613019	4.97999
chr10	100800000	100899999	-0.983957	3.97277	ENSG00000234109
chr10	100900000	100999999	-0.840877	5.20363
chr10	101100000	101199999	-0.109554	4.42817	ENSG00000119946 ENSG00000120053 ENSG00000224934
chr10	101200000	101299999	0.262276	3.97888	ENSG00000257582 ENSG00000228778 ENSG00000119919
chr10	101300000	101399999	0.599379	4.30208	ENSG00000238588 ENSG00000155287
chr10	112500000	112599999	0.586266	4.5542	ENSG00000203867 ENSG00000252036 ENSG00000199364
chr10	113700000	113799999	-1.20747	4.73732
chr10	113900000	113999999	-0.778618	5.44328	ENSG00000119927
chr10	114000000	114099999	-0.215318	6.03747	ENSG00000119913 ENSG00000243316
chr10	114100000	114199999	0.26046	4.05433	ENSG00000197142 ENSG00000232934 ENSG00000233346 ENSG00000023041
chr10	115200000	115299999	-0.442534	5.05908	ENSG00000230018
chr10	115400000	115499999	-0.608835	7.6666	ENSG00000165806 ENSG00000242481 ENSG00000234393
chr10	115500000	115599999	-0.447213	6.93491	ENSG00000148735 ENSG00000212589
chr10	115600000	115699999	-0.388991	6.03549	ENSG00000198924 ENSG00000196865 ENSG00000234631
chr10	115700000	115799999	-0.414278	6.9755
chr10	115800000	115899999	-0.32949	6.46075	ENSG00000043591 ENSG00000253066 ENSG00000226582
chr10	116000000	116099999	-0.0576332	5.26999	ENSG00000165816 ENSG00000230165
chr10	116100000	116199999	0.152693	3.83984	ENSG00000169129 ENSG00000242912
chr10	116300000	116399999	0.273354	3.79677
chr10	116700000	116799999	0.23814	3.96845	ENSG00000165832 ENSG00000252611 ENSG00000236799
chr10	116800000	116899999	0.00613839	4.86635
chr10	117400000	117499999	-0.926971	5.37162
chr10	119500000	119599999	-1.08845	4.22687
chr10	123800000	123899999	0.432609	6.82141
chr10	123900000	123999999	0.233079	6.35738
chr10	124000000	124099999	0.128679	7.75225	ENSG00000138152
chr10	124100000	124199999	-0.0553355	8.69303	ENSG00000202245 ENSG00000107679
chr10	124200000	124299999	-0.196196	6.18018	ENSG00000254636 ENSG00000166033
chr10	124500000	124599999	-0.654066	4.56414	ENSG00000176584
chr10	126900000	126999999	-0.173966	4.00652
chr10	12700000	12799999	0.00584856	3.73678	ENSG00000221331
chr10	127200000	127299999	-0.613078	6.20578	ENSG00000237675
chr10	127300000	127399999	-0.373461	5.63481	ENSG00000175018 ENSG00000214297 ENSG00000228021 ENSG00000224023
chr10	127400000	127499999	-0.141461	8.01962	ENSG00000234134 ENSG00000107938 ENSG00000236991 ENSG00000214294 ENSG00000154485 ENSG00000188690
chr10	127500000	127599999	-0.202983	7.3245	ENSG00000107949 ENSG00000089876 ENSG00000215972 ENSG00000222629
chr10	127600000	127699999	-0.395558	6.55163	ENSG00000203780 ENSG00000234016 ENSG00000233409
chr10	12800000	12899999	0.179614	3.79207
chr10	129300000	129399999	-1.02143	4.90969	ENSG00000214285
chr10	129400000	129499999	-1.03102	5.22547
chr10	129600000	129699999	-0.951311	4.74071	ENSG00000180745
chr10	13000000	13099999	0.585002	4.11139
chr10	130500000	130599999	-1.22106	3.86072
chr10	130900000	130999999	-1.21815	3.90927
chr10	131000000	131099999	-1.21089	4.09697	ENSG00000225424
chr10	131200000	131299999	-1.03379	3.99313
chr10	131300000	131399999	-1.13245	3.96192
chr10	131400000	131499999	-1.21814	4.60376	ENSG00000237224
chr10	131600000	131699999	-0.924943	5.64743	ENSG00000108001
chr10	131800000	131899999	-0.641795	5.64268	ENSG00000237489
chr10	131900000	131999999	-0.655437	5.31735	ENSG00000233122 ENSG00000244919 ENSG00000233319 ENSG00000108010 ENSG00000203417
chr10	132000000	132099999	-1.08093	5.52552	ENSG00000237364
chr10	132200000	132299999	-1.23876	5.0275	ENSG00000236303
chr10	134000000	134099999	0.449918	3.85757	ENSG00000151640 ENSG00000165752
chr10	134500000	134599999	-0.0760177	5.19123	ENSG00000234531 ENSG00000148826
chr10	1400000	1499999	-0.0558832	-5.2399	ENSG00000233052
chr10	14300000	14399999	0.842274	-4.35173
chr10	14400000	14499999	0.95309	-5.26179	ENSG00000221371
chr10	14500000	14599999	0.946808	-5.83018
chr10	14700000	14799999	0.767099	-5.07828	ENSG00000201766 ENSG00000237032
chr10	14800000	14899999	0.665243	-4.36166	ENSG00000185267 ENSG00000187522 ENSG00000235177
chr10	1500000	1599999	-0.485718	-5.18629	ENSG00000205696
chr10	15100000	15199999	0.799549	-4.4343	ENSG00000176244 ENSG00000228312 ENSG00000176236 ENSG00000152464 ENSG00000241107 ENSG00000152465 ENSG00000206448
chr10	15200000	15299999	0.840672	-6.79938	ENSG00000248743 ENSG00000228181 ENSG00000232739
chr10	15300000	15399999	0.503106	-4.79278	ENSG00000148468
chr10	15700000	15799999	-0.863853	4.07347
chr10	17600000	17699999	0.662728	-4.66801	ENSG00000236582 ENSG00000165996
chr10	17700000	17799999	0.569868	-4.23536	ENSG00000136738 ENSG00000251959 ENSG00000229190
chr10	21000000	21099999	0.235933	-4.58531	ENSG00000235940
chr10	24100000	24199999	-0.970589	4.08913
chr10	24300000	24399999	-0.631444	3.7344
chr10	24400000	24499999	-0.46735	4.7294	ENSG00000223928
chr10	24500000	24599999	-0.415882	4.73359	ENSG00000238115 ENSG00000228508 ENSG00000207930
chr10	29400000	29499999	0.111623	-4.05237
chr10	35400000	35499999	1.10145	-6.52768	ENSG00000230534 ENSG00000095794 ENSG00000253054 ENSG00000233343
chr10	43400000	43499999	-0.316321	4.22968	ENSG00000229630
chr10	44100000	44199999	-0.119719	5.02891	ENSG00000232004 ENSG00000198298 ENSG00000223910 ENSG00000237389 ENSG00000238263 ENSG00000169740 ENSG00000226245 ENSG00000230565 ENSG00000228426
chr10	44200000	44299999	-0.564083	4.10483	ENSG00000224162 ENSG00000223746 ENSG00000234973 ENSG00000226790
chr10	50500000	50599999	-0.768799	4.16258	ENSG00000236208 ENSG00000177354 ENSG00000165606
chr10	50800000	50899999	-0.107616	3.77664	ENSG00000070748 ENSG00000187714
chr10	50900000	50999999	0.0630409	4.32726	ENSG00000178645 ENSG00000239647 ENSG00000197444 ENSG00000226389
chr10	53600000	53699999	0.406634	-4.95438
chr10	53800000	53899999	0.33253	-5.17105
chr10	53900000	53999999	0.265711	-4.13106
chr10	60000000	60099999	-0.139208	4.9637	ENSG00000122873 ENSG00000228527
chr10	60600000	60699999	-0.930039	4.32656	ENSG00000252076
chr10	60800000	60899999	-0.982766	4.15947	ENSG00000226888 ENSG00000226557
chr10	60900000	60999999	-0.945407	5.38294	ENSG00000165443
chr10	6100000	6199999	1.16972	-5.18141	ENSG00000214015 ENSG00000134453 ENSG00000229260 ENSG00000232547 ENSG00000201581
chr10	61000000	61099999	-1.02469	6.90716	ENSG00000148541 ENSG00000236556
chr10	61500000	61599999	0.0772301	5.53127	ENSG00000227877
chr10	61900000	61999999	0.146938	4.42039
chr10	6400000	6499999	0.932617	-5.13364
chr10	64000000	64099999	-0.428747	5.17557	ENSG00000234756
chr10	64100000	64199999	-0.5115	4.1352	ENSG00000239604 ENSG00000240940
chr10	64600000	64699999	-0.602306	4.00625	ENSG00000122877
chr10	64700000	64799999	-0.349798	5.24591
chr10	64800000	64899999	0.142767	5.44185	ENSG00000199446 ENSG00000224301
chr10	6500000	6599999	0.754951	-5.91216	ENSG00000065675
chr10	6600000	6699999	0.676231	-6.33597	ENSG00000237943 ENSG00000225948
chr10	6700000	6799999	0.788314	-8.96971	ENSG00000223784
chr10	6800000	6899999	0.671864	-7.98057	ENSG00000238266 ENSG00000227821
chr10	6900000	6999999	0.454585	-6.68622	ENSG00000234248
chr10	7000000	7099999	0.21575	-4.72092
chr10	71100000	71199999	1.36288	-4.13712	ENSG00000221774 ENSG00000075073 ENSG00000232734
chr10	72600000	72699999	0.487771	5.37636	ENSG00000166224 ENSG00000237998 ENSG00000166228 ENSG00000237047
chr10	72700000	72799999	0.029015	6.49476
chr10	72800000	72899999	-0.139043	5.95322
chr10	77200000	77299999	-0.225281	3.96605
chr10	79300000	79399999	0.910429	-4.11152	ENSG00000199592
chr10	79400000	79499999	1.16386	-5.26481	ENSG00000213514
chr10	79500000	79599999	1.2806	-4.65202	ENSG00000199664 ENSG00000213513 ENSG00000228748
chr10	80500000	80599999	-0.302776	4.02738	ENSG00000223243
chr10	80600000	80699999	0.0250937	4.44976
chr10	82600000	82699999	-0.608588	-3.75911
chr10	82700000	82799999	-0.696985	-4.41036	ENSG00000227209
chr10	82800000	82899999	-0.749922	-5.18914	ENSG00000226466
chr10	86000000	86099999	0.529765	-4.69726	ENSG00000148604 ENSG00000229404
chr10	87300000	87399999	-1.04201	3.86766	ENSG00000252730 ENSG00000234942
chr10	91100000	91199999	0.848701	-4.4271	ENSG00000224289 ENSG00000204010 ENSG00000185745 ENSG00000152778
chr10	91300000	91399999	1.00045	-5.6242	ENSG00000152782 ENSG00000198997 ENSG00000235344
chr10	91400000	91499999	0.899366	-3.77928	ENSG00000249962 ENSG00000232936 ENSG00000225836 ENSG00000235100 ENSG00000240996 ENSG00000138182
chr10	91900000	91999999	-0.427425	-5.01045	ENSG00000222451
chr10	92000000	92099999	-0.328837	-5.61228
chr10	92100000	92199999	-0.321568	-5.90046
chr10	92200000	92299999	-0.365719	-4.53254	ENSG00000236373 ENSG00000224750 ENSG00000238291
chr10	95700000	95799999	0.0661767	3.93003	ENSG00000180764
chr10	97000000	97099999	1.35437	-6.04971	ENSG00000107438 ENSG00000240407
chr10	99900000	99999999	-0.119483	4.32862	ENSG00000166024
chr11	106800000	106899999	-1.2349	4.32333
chr11	112000000	112099999	0.552806	4.04337	ENSG00000255292 ENSG00000150782 ENSG00000254638 ENSG00000150783 ENSG00000197580 ENSG00000214264 ENSG00000255231 ENSG00000243930
chr11	112300000	112399999	-0.742151	4.65786	ENSG00000213233
chr11	112400000	112499999	-0.894999	4.78879	ENSG00000255484 ENSG00000212397
chr11	112500000	112599999	-0.963998	4.5857	ENSG00000241998
chr11	112600000	112699999	-1.01032	5.39543	ENSG00000254626
chr11	112700000	112799999	-1.02528	5.59581
chr11	112800000	112899999	-1.02461	4.73094	ENSG00000247416 ENSG00000238998
chr11	113100000	113199999	-0.83592	3.98231	ENSG00000227487 ENSG00000255129
chr11	113200000	113299999	-0.491827	3.84525	ENSG00000149292 ENSG00000170209 ENSG00000256757
chr11	12300000	12399999	0.350826	4.53391	ENSG00000133808 ENSG00000254983
chr11	12400000	12499999	0.479165	4.13651	ENSG00000197702
chr11	125000000	125099999	0.417194	4.61383	ENSG00000255475 ENSG00000254880
chr11	12700000	12799999	0.67246	4.48997
chr11	127100000	127199999	-1.24701	3.92487
chr11	12800000	12899999	0.361842	3.85288	ENSG00000254688 ENSG00000255067
chr11	128600000	128699999	0.989534	-3.96891	ENSG00000151702
chr11	12900000	12999999	0.382978	4.31773	ENSG00000252329 ENSG00000203258 ENSG00000251381
chr11	129100000	129199999	0.128619	3.90177	ENSG00000242459 ENSG00000255259
chr11	129200000	129299999	-0.103659	4.11026	ENSG00000043039
chr11	13000000	13099999	0.197659	5.00904	ENSG00000254670 ENSG00000189431
chr11	130900000	130999999	0.185202	-4.13985	ENSG00000221516
chr11	13100000	13199999	0.2459	5.81292	ENSG00000255558 ENSG00000255018
chr11	131000000	131099999	0.163133	-4.0106	ENSG00000236129 ENSG00000227125
chr11	131100000	131199999	0.112863	-3.87672	ENSG00000237612 ENSG00000231698
chr11	13400000	13499999	-0.0228694	5.24078	ENSG00000148925
chr11	134300000	134399999	-0.226422	-4.40311	ENSG00000255545 ENSG00000216049
chr11	13500000	13599999	-0.377705	5.13244	ENSG00000254583 ENSG00000255401 ENSG00000152266
chr11	13600000	13699999	-0.337523	5.07891	ENSG00000228901 ENSG00000254791
chr11	13700000	13799999	-0.335253	4.9111	ENSG00000197601 ENSG00000240454 ENSG00000200685 ENSG00000255075 ENSG00000255088
chr11	15000000	15099999	-0.856017	3.8924	ENSG00000175868 ENSG00000250640
chr11	15200000	15299999	-1.24477	6.30042	ENSG00000188487
chr11	15300000	15399999	-1.2004	4.7232
chr11	17900000	17999999	0.0379962	5.93023
chr11	18300000	18399999	0.458583	4.7436	ENSG00000110756 ENSG00000110768
chr11	18600000	18699999	0.315953	6.12647	ENSG00000256282 ENSG00000247595 ENSG00000179119 ENSG00000257043
chr11	18700000	18799999	0.096157	4.59575	ENSG00000151117 ENSG00000179057 ENSG00000254966 ENSG00000110786
chr11	19200000	19299999	-0.331108	3.74764	ENSG00000129170 ENSG00000255308 ENSG00000129173 ENSG00000254544
chr11	20500000	20599999	-0.22733	4.41245	ENSG00000255291
chr11	20700000	20799999	-0.861903	4.99874
chr11	2200000	2299999	-0.18223	5.7392	ENSG00000183734
chr11	2400000	2499999	0.0170089	5.89394	ENSG00000110651 ENSG00000184281 ENSG00000230483 ENSG00000070985
chr11	2500000	2599999	0.0140323	3.90832
chr11	27800000	27899999	0.465328	-3.99139	ENSG00000255496 ENSG00000177447
chr11	32300000	32399999	-0.517555	4.16207
chr11	32400000	32499999	-0.34121	4.62066	ENSG00000184937 ENSG00000183242
chr11	43300000	43399999	0.00103094	4.07692	ENSG00000166181 ENSG00000254907 ENSG00000252652
chr11	43700000	43799999	0.596331	4.13716	ENSG00000243721 ENSG00000254512
chr11	43900000	43999999	0.606031	4.35817	ENSG00000166199 ENSG00000213693 ENSG00000244926 ENSG00000254409 ENSG00000187479 ENSG00000244953
chr11	44000000	44099999	0.54255	6.10887	ENSG00000205126 ENSG00000110455 ENSG00000255165
chr11	44100000	44199999	0.466568	4.61681	ENSG00000151348
chr11	4600000	4699999	-1.03386	4.36637	ENSG00000226288 ENSG00000232268 ENSG00000167333 ENSG00000197428 ENSG00000180785 ENSG00000180723
chr11	57700000	57799999	0.391185	3.79181	ENSG00000254749 ENSG00000254601 ENSG00000200817 ENSG00000172381
chr11	5900000	5999999	-0.563135	-6.33478	ENSG00000180974 ENSG00000255257 ENSG00000184478 ENSG00000188691
chr11	6000000	6099999	-0.318055	-6.00074	ENSG00000183313 ENSG00000254831 ENSG00000183389 ENSG00000202147 ENSG00000180934 ENSG00000255481 ENSG00000234895
chr11	60500000	60599999	-0.0587331	4.04276	ENSG00000214782 ENSG00000166961 ENSG00000172689 ENSG00000255845
chr11	60600000	60699999	0.297284	4.82812	ENSG00000255959 ENSG00000256813 ENSG00000110104 ENSG00000183134 ENSG00000149506 ENSG00000110107 ENSG00000257052 ENSG00000256944 ENSG00000110108 ENSG00000256196 ENSG00000006118
chr11	60800000	60899999	0.672311	3.86438	ENSG00000256733 ENSG00000110448
chr11	6100000	6199999	0.117262	-5.4172	ENSG00000180919 ENSG00000254444 ENSG00000180913 ENSG00000180909 ENSG00000255307
chr11	6200000	6299999	0.525428	-4.06424	ENSG00000175485 ENSG00000180878 ENSG00000051009 ENSG00000132259 ENSG00000110148
chr11	6300000	6399999	1.0009	-5.82462	ENSG00000170955 ENSG00000254443
chr11	6400000	6499999	1.22005	-5.06809	ENSG00000166311 ENSG00000166313 ENSG00000110169 ENSG00000110171 ENSG00000132254
chr11	6500000	6599999	1.09766	-6.54272	ENSG00000132286 ENSG00000254595 ENSG00000179532
chr11	6600000	6699999	1.0336	-4.58071	ENSG00000132275 ENSG00000254400 ENSG00000166333 ENSG00000166337 ENSG00000254641 ENSG00000166340 ENSG00000255680 ENSG00000166341 ENSG00000255390 ENSG00000255410
chr11	72100000	72199999	0.910522	4.21407	ENSG00000256403 ENSG00000237408
chr11	75700000	75799999	0.649184	3.90801
chr11	79300000	79399999	-0.857914	3.97909	ENSG00000255209
chr11	79400000	79499999	-0.992256	4.75196	ENSG00000221551
chr11	8200000	8299999	0.926814	-5.22849	ENSG00000166407
chr11	8300000	8399999	0.854373	-3.81932
chr11	84500000	84599999	-0.416293	-4.01267
chr11	84700000	84799999	-0.576615	-3.75118	ENSG00000255396 ENSG00000213305 ENSG00000243618
chr11	85900000	85999999	0.874052	4.08427	ENSG00000254699 ENSG00000254502 ENSG00000074266 ENSG00000254783
chr11	92700000	92799999	0.285736	-4.24837	ENSG00000134640 ENSG00000242807
chr11	93800000	93899999	-0.0497313	3.78326	ENSG00000181333 ENSG00000110218
chr11	96500000	96599999	0.182526	-5.19274	ENSG00000254587 ENSG00000255376
chr11	96600000	96699999	-0.233914	-5.35598
chr12	10300000	10399999	-0.000224326	-3.86916	ENSG00000173391 ENSG00000165685 ENSG00000255895 ENSG00000139112 ENSG00000255958 ENSG00000245856
chr12	106100000	106199999	-0.804262	3.95653	ENSG00000257859
chr12	106200000	106299999	-0.762515	4.1813
chr12	106300000	106399999	-0.600885	4.60054
chr12	106400000	106499999	-0.352814	5.53761	ENSG00000257773 ENSG00000257890 ENSG00000074590 ENSG00000257438
chr12	106500000	106599999	-0.296919	6.73264	ENSG00000257611
chr12	106700000	106799999	-0.0751142	5.85101	ENSG00000166046
chr12	106800000	106899999	-0.114422	6.3959	ENSG00000013503
chr12	107000000	107099999	0.157647	4.78431	ENSG00000111783 ENSG00000257711
chr12	107100000	107199999	0.242658	4.65369	ENSG00000257918
chr12	115300000	115399999	-0.910776	3.74388
chr12	115400000	115499999	-1.16509	4.12245
chr12	115500000	115599999	-1.22922	5.031	ENSG00000257958
chr12	116000000	116099999	-1.14543	6.22175	ENSG00000258108 ENSG00000258280 ENSG00000257407 ENSG00000241656
chr12	116100000	116199999	-1.08233	6.00828	ENSG00000240205
chr12	116600000	116699999	0.236236	4.7167	ENSG00000257979 ENSG00000258337
chr12	132900000	132999999	0.526949	5.56071	ENSG00000255916
chr12	18400000	18499999	-0.315065	-4.20645
chr12	18700000	18799999	-0.321328	-4.00961
chr12	18800000	18899999	-0.123983	-4.64024	ENSG00000139151 ENSG00000255993 ENSG00000255648 ENSG00000177938
chr12	22400000	22499999	-0.953676	6.37137
chr12	22600000	22699999	-0.512971	5.66813	ENSG00000111731 ENSG00000256973
chr12	22800000	22899999	-0.493561	6.10421	ENSG00000139163 ENSG00000241451 ENSG00000256923
chr12	2700000	2799999	1.1617	-4.61085	ENSG00000256769 ENSG00000203648 ENSG00000256271 ENSG00000246627
chr12	30200000	30299999	-0.773629	4.50793
chr12	400000	499999	0.652267	5.04019	ENSG00000073614
chr12	45600000	45699999	-0.0548346	4.12978
chr12	45800000	45899999	-0.104389	3.73173	ENSG00000257368
chr12	46100000	46199999	0.066367	4.20942
chr12	46300000	46399999	0.165439	5.08526	ENSG00000139218 ENSG00000239397
chr12	52700000	52799999	-0.00407262	3.8301	ENSG00000257829 ENSG00000170523 ENSG00000135443 ENSG00000161849 ENSG00000258253 ENSG00000161850
chr12	59500000	59599999	0.347786	-4.93922
chr12	59800000	59899999	0.280041	-5.32276	ENSG00000251931
chr12	59900000	59999999	0.171868	-5.77904	ENSG00000257230 ENSG00000202471
chr12	60000000	60099999	-0.0542201	-4.55976	ENSG00000118596
chr12	72500000	72599999	-0.238111	-3.72955
chr12	72600000	72699999	-0.127452	-4.11086	ENSG00000236333
chr12	72700000	72799999	-0.350158	-3.81162
chr12	72800000	72899999	-0.480745	-4.90136	ENSG00000257287
chr12	77700000	77799999	-0.194505	-4.29462	ENSG00000257835
chr12	77800000	77899999	-0.351957	-4.10573
chr12	78800000	78899999	-0.116109	-4.5564	ENSG00000258084 ENSG00000257879 ENSG00000257165
chr12	78900000	78999999	0.158349	-6.19226
chr12	79000000	79099999	0.431522	-7.13429
chr12	79100000	79199999	0.587694	-8.71722	ENSG00000257564
chr12	79200000	79299999	0.644761	-8.49868	ENSG00000257948
chr12	79300000	79399999	0.538477	-7.31709	ENSG00000257191
chr12	79400000	79499999	0.42708	-6.17715
chr12	81000000	81099999	-0.00498452	-4.26155
chr12	81200000	81299999	0.0377165	-5.15837	ENSG00000111052 ENSG00000207763 ENSG00000258215
chr12	81300000	81399999	-0.104888	-4.21114	ENSG00000208022
chr12	85100000	85199999	0.338213	-4.85578
chr12	86300000	86399999	0.0487669	-3.9114	ENSG00000258178
chr12	89200000	89299999	0.00740678	-4.19908	ENSG00000239760
chr12	94300000	94399999	0.344578	4.5352	ENSG00000257283
chr13	101100000	101199999	0.827066	-3.90798	ENSG00000234650 ENSG00000234354
chr13	110300000	110399999	-0.615555	4.02488	ENSG00000234854
chr13	111900000	111999999	-0.0819626	4.36676	ENSG00000153495
chr13	112100000	112199999	-0.812921	8.1751
chr13	112200000	112299999	-1.06772	6.79459	ENSG00000204398 ENSG00000215881
chr13	112600000	112699999	-1.08993	6.21382
chr13	112700000	112799999	-0.882102	6.56033	ENSG00000200072 ENSG00000182968 ENSG00000229520 ENSG00000224243
chr13	21000000	21099999	0.395967	4.81708	ENSG00000165475
chr13	21200000	21299999	0.777342	3.94466	ENSG00000032742 ENSG00000172458 ENSG00000203614
chr13	22000000	22099999	0.647807	4.40287	ENSG00000226908
chr13	22200000	22299999	-0.220295	6.02488	ENSG00000226525 ENSG00000102678
chr13	22300000	22399999	-0.832094	5.27392	ENSG00000244197
chr13	25000000	25099999	0.107156	3.73466	ENSG00000243008 ENSG00000102699
chr13	31700000	31799999	-0.0754357	4.01211	ENSG00000120694
chr13	31800000	31899999	-0.559873	4.11721	ENSG00000187676 ENSG00000229427
chr13	31900000	31999999	-0.642937	4.08481
chr13	33500000	33599999	-0.117195	3.87582	ENSG00000227604
chr13	44400000	44499999	-0.315183	3.94702	ENSG00000151773 ENSG00000179630
chr13	44500000	44599999	-0.407442	5.54285	ENSG00000179611
chr13	44600000	44699999	-0.302396	5.12464	ENSG00000233725 ENSG00000226519
chr13	44700000	44799999	-0.109386	4.39797	ENSG00000227258 ENSG00000139656 ENSG00000235285
chr13	44800000	44899999	0.0998631	3.86252	ENSG00000230731
chr13	44900000	44999999	0.267014	4.573	ENSG00000151778 ENSG00000237361
chr13	49600000	49699999	0.536612	-4.25465	ENSG00000223724 ENSG00000199788
chr13	49700000	49799999	0.754579	-5.82871	ENSG00000235957 ENSG00000231665 ENSG00000102539
chr13	49900000	49999999	0.841096	-5.08356	ENSG00000102547
chr13	50000000	50099999	0.928594	-5.4467	ENSG00000215462 ENSG00000136169 ENSG00000236577 ENSG00000136147
chr13	54800000	54899999	0.259643	-4.38431
chr13	54900000	54999999	0.326911	-3.74067
chr13	55900000	55999999	0.309276	-3.99034
chr13	56100000	56199999	0.393165	-4.2951
chr13	56300000	56399999	0.370683	-4.25567
chr13	60200000	60299999	0.255495	-5.14907
chr13	60300000	60399999	0.17439	-4.14917
chr13	60400000	60499999	0.0713671	-4.86168
chr13	60500000	60599999	0.18897	-5.43458
chr13	60600000	60699999	0.537456	-4.98606	ENSG00000227528
chr13	60700000	60799999	0.63608	-3.91061	ENSG00000223815 ENSG00000202151 ENSG00000227336
chr13	60900000	60999999	0.606012	-4.50735
chr13	61000000	61099999	0.415295	-3.88589	ENSG00000083544 ENSG00000212054
chr13	61100000	61199999	0.162818	-4.34823	ENSG00000223076
chr13	61200000	61299999	-0.136935	-4.4529	ENSG00000236608 ENSG00000225249
chr13	61300000	61399999	-0.407153	-4.18736	ENSG00000206854 ENSG00000253018
chr13	68600000	68699999	-1.09077	3.96567
chr14	101600000	101699999	-0.749273	4.36857	ENSG00000206761 ENSG00000258681
chr14	101700000	101799999	-0.765397	4.07752	ENSG00000258497 ENSG00000258460
chr14	101800000	101899999	-0.741873	4.20655	ENSG00000259023
chr14	101900000	101999999	-0.430044	4.55804	ENSG00000259082 ENSG00000259166
chr14	104600000	104699999	-0.0474706	4.09372	ENSG00000258748 ENSG00000066735
chr14	31500000	31599999	0.812865	3.93235	ENSG00000100478 ENSG00000258640
chr14	31900000	31999999	0.213539	4.5538	ENSG00000250365 ENSG00000129480 ENSG00000239323 ENSG00000214943
chr14	32200000	32299999	-0.643836	6.10274
chr14	32300000	32399999	-0.691609	7.70479	ENSG00000257472
chr14	32400000	32499999	-0.656474	7.19349	ENSG00000258474 ENSG00000258386
chr14	32600000	32699999	-0.419037	5.94259	ENSG00000201654 ENSG00000202337
chr14	32700000	32799999	-0.627839	5.61608	ENSG00000258619 ENSG00000259086
chr14	32800000	32899999	-0.685054	3.86394	ENSG00000258580
chr14	34200000	34299999	-0.609272	3.82151
chr14	34300000	34399999	-0.387845	4.18294
chr14	34500000	34599999	-0.389488	3.99229	ENSG00000258897
chr14	34600000	34699999	-0.134437	4.09519
chr14	34700000	34799999	0.332038	3.91128
chr14	38400000	38499999	0.190145	-4.86213	ENSG00000258696
chr14	38500000	38599999	0.308533	-5.71977	ENSG00000259048
chr14	38700000	38799999	0.121037	-5.56123	ENSG00000176435 ENSG00000259072
chr14	38800000	38899999	-0.167657	-4.05498
chr14	49000000	49099999	-0.393817	-3.92374
chr14	51200000	51299999	1.66764	-4.54531	ENSG00000100503 ENSG00000258843
chr14	51300000	51399999	1.3739	-4.01762	ENSG00000252945 ENSG00000258687 ENSG00000100504 ENSG00000131969 ENSG00000258398 ENSG00000258745
chr14	52100000	52199999	0.417425	4.04441	ENSG00000251756 ENSG00000207004
chr14	52800000	52899999	0.578229	-4.74407
chr14	54900000	54999999	1.38867	-3.94313	ENSG00000100528 ENSG00000258753 ENSG00000197045 ENSG00000100532
chr14	55100000	55199999	1.59364	-4.53314
chr14	58500000	58599999	0.555443	-4.52811	ENSG00000258836
chr14	59900000	59999999	-0.00103122	3.98026	ENSG00000181619 ENSG00000126790 ENSG00000258782 ENSG00000050130
chr14	60100000	60199999	-0.634847	3.74445
chr14	60200000	60299999	-0.728462	3.94594
chr14	62000000	62099999	1.55558	-4.33095	ENSG00000258989 ENSG00000258926 ENSG00000250548 ENSG00000232774
chr14	62300000	62399999	0.791138	-3.96928	ENSG00000258882
chr14	62400000	62499999	0.337556	-3.96418
chr14	78300000	78399999	0.558324	-6.31189	ENSG00000063761
chr14	78400000	78499999	0.0475725	-7.02268
chr14	78500000	78599999	-0.419776	-4.29138	ENSG00000258421
chr14	81400000	81499999	-0.635432	3.93799	ENSG00000258915 ENSG00000259167
chr14	88500000	88599999	-1.04511	3.9676	ENSG00000258867
chr14	88600000	88699999	-0.911962	3.96319	ENSG00000258975 ENSG00000258538
chr14	88700000	88799999	-0.6488	4.912	ENSG00000100433
chr14	88800000	88899999	-0.328896	4.37558	ENSG00000042317
chr14	88900000	88999999	-0.113052	4.9492	ENSG00000070778 ENSG00000258983 ENSG00000222990
chr14	89100000	89199999	-0.00200829	4.06272	ENSG00000165521
chr14	91000000	91099999	0.868816	4.83921	ENSG00000252748 ENSG00000258935
chr14	91100000	91199999	0.759113	4.07584	ENSG00000259163 ENSG00000258437 ENSG00000258716
chr14	93100000	93199999	0.488846	4.85972	ENSG00000100600
chr14	93300000	93399999	0.602676	4.74656	ENSG00000258742 ENSG00000258499 ENSG00000100604
chr14	95300000	95399999	-0.615663	5.62495
chr14	95400000	95499999	-0.504563	5.9851	ENSG00000258933
chr14	95500000	95599999	-0.195686	5.76587	ENSG00000258866 ENSG00000100697
chr14	95700000	95799999	0.000254019	4.60968	ENSG00000165959 ENSG00000258630
chr14	95800000	95899999	0.00285865	5.53402	ENSG00000229645
chr14	95900000	95999999	0.274096	4.55055	ENSG00000176438 ENSG00000258572 ENSG00000247092 ENSG00000252481
chr14	97000000	97099999	0.206595	4.4115	ENSG00000090060 ENSG00000258702
chr14	97400000	97499999	-0.743464	4.8549	ENSG00000258825 ENSG00000225163
chr14	97500000	97599999	-0.848447	4.35092	ENSG00000259026 ENSG00000258393
chr15	100800000	100899999	-1.13889	4.13669	ENSG00000189419
chr15	102100000	102199999	-0.30948	4.93831	ENSG00000184277 ENSG00000252614
chr15	28200000	28299999	-0.883173	3.96713
chr15	28400000	28499999	-0.501223	4.10719
chr15	33100000	33199999	0.710556	-4.06319	ENSG00000238342
chr15	35000000	35099999	0.750541	-4.00557	ENSG00000159248 ENSG00000250007 ENSG00000159251
chr15	35100000	35199999	0.961562	-5.07419
chr15	35300000	35399999	0.817139	-4.38604	ENSG00000255192
chr15	35400000	35499999	0.879776	-5.53984
chr15	35500000	35599999	0.707805	-6.76141
chr15	35600000	35699999	0.361514	-6.82307
chr15	35800000	35899999	-0.0865969	-4.91363
chr15	38100000	38199999	-0.732595	3.91135
chr15	38300000	38399999	-0.231532	4.38543	ENSG00000236914
chr15	38400000	38499999	-0.181846	4.88799
chr15	38500000	38599999	-0.0697733	3.92127	ENSG00000166068
chr15	40600000	40699999	1.69395	-5.60557	ENSG00000244705 ENSG00000188549 ENSG00000252714 ENSG00000233041 ENSG00000140323 ENSG00000128944
chr15	41200000	41299999	1.58284	-4.05125	ENSG00000251161 ENSG00000128917 ENSG00000128965
chr15	45400000	45499999	0.398664	4.15991	ENSG00000140274 ENSG00000140254 ENSG00000137857 ENSG00000138606
chr15	51400000	51499999	0.442033	-3.78585
chr15	54000000	54099999	-0.987019	3.83922	ENSG00000206641
chr15	55200000	55299999	-0.947325	4.63466
chr15	55300000	55399999	-0.726238	5.46289
chr15	55900000	55999999	0.0176561	7.16451	ENSG00000166450
chr15	56000000	56099999	0.00471287	6.88032	ENSG00000221218
chr15	56900000	56999999	0.362382	4.75717	ENSG00000137871 ENSG00000241300
chr15	58200000	58299999	-0.723845	7.20874
chr15	58400000	58499999	-0.393012	3.78745	ENSG00000103569 ENSG00000243765 ENSG00000240903 ENSG00000241491 ENSG00000242263 ENSG00000242422 ENSG00000240934
chr15	60900000	60999999	1.21389	-3.72581
chr15	62200000	62299999	-0.54794	3.89112
chr15	62300000	62399999	-0.233213	4.1956	ENSG00000198535
chr15	69700000	69799999	0.163015	5.99295	ENSG00000137807 ENSG00000137818 ENSG00000207119
chr15	69800000	69899999	-0.125334	4.92537	ENSG00000245750
chr15	70000000	70099999	-0.600391	5.89167	ENSG00000238870 ENSG00000215958
chr15	70100000	70199999	-0.677189	6.24272
chr15	70200000	70299999	-0.526118	5.34095
chr15	70300000	70399999	-0.270471	5.04443	ENSG00000140332 ENSG00000207965
chr15	70400000	70499999	-0.198646	5.13736	ENSG00000200216
chr15	70500000	70599999	-0.262168	4.5247
chr15	70600000	70699999	-0.232722	4.30889
chr15	80300000	80399999	0.852695	-5.38256	ENSG00000242967 ENSG00000086666
chr15	90100000	90199999	0.771609	4.22561	ENSG00000140534 ENSG00000166813
chr15	93900000	93999999	-0.432613	4.05549	ENSG00000258909 ENSG00000252567 ENSG00000258787
chr15	98000000	98099999	-1.28959	3.86378	ENSG00000251729
chr15	98400000	98499999	-1.26196	4.10842	ENSG00000140450
chr16	1100000	1199999	0.515428	6.0893	ENSG00000181791 ENSG00000162009 ENSG00000184471
chr16	11800000	11899999	1.6851	-4.05525	ENSG00000153066 ENSG00000122299
chr16	13400000	13499999	-0.0812145	-3.71429
chr16	13500000	13599999	0.0810001	-4.48524
chr16	18700000	18799999	-0.0569005	4.69479	ENSG00000134419
chr16	21100000	21199999	0.645118	-5.78227	ENSG00000011638
chr16	22900000	22999999	0.149045	-4.08038
chr16	26100000	26199999	-0.386007	-4.78301
chr16	27700000	27799999	-0.0271482	4.02086	ENSG00000201371
chr16	27800000	27899999	-0.0255507	6.23482	ENSG00000212382
chr16	27900000	27999999	0.0566775	6.0477
chr16	3300000	3399999	1.39185	-3.73246	ENSG00000006194 ENSG00000140993 ENSG00000162086
chr16	48300000	48399999	0.294908	5.61032	ENSG00000102910 ENSG00000240793
chr16	48800000	48899999	-0.570931	4.60128
chr16	48900000	48999999	-0.836013	5.53745
chr16	49000000	49099999	-0.933425	4.19773
chr16	49100000	49199999	-0.933547	3.76686
chr16	50700000	50799999	-0.303555	5.05176	ENSG00000167208 ENSG00000167207
chr16	50800000	50899999	-0.620025	5.91832	ENSG00000083799
chr16	50900000	50999999	-0.820906	5.43458	ENSG00000199771
chr16	51000000	51099999	-0.766829	5.93575
chr16	51100000	51199999	-0.612605	4.96217	ENSG00000103449
chr16	51200000	51299999	-0.596041	3.98635
chr16	51300000	51399999	-0.586584	3.85517
chr16	53000000	53099999	0.287343	4.31211
chr16	53500000	53599999	0.201193	4.51162	ENSG00000166971
chr16	53600000	53699999	-0.0169673	4.90111	ENSG00000103494
chr16	53700000	53799999	-0.132073	4.81778
chr16	54000000	54099999	-0.711385	4.34278
chr16	54200000	54299999	-0.791529	6.16183
chr16	54300000	54399999	-0.938767	6.61512	ENSG00000177508
chr16	54400000	54499999	-1.17551	6.15875
chr16	54500000	54599999	-1.32082	6.29577
chr16	54600000	54699999	-1.22839	5.64234
chr16	54700000	54799999	-1.31255	6.16268
chr16	54900000	54999999	-1.05526	4.59852	ENSG00000245694 ENSG00000176842
chr16	55000000	55099999	-1.2086	4.79247
chr16	55200000	55299999	-1.15817	4.2571
chr16	55300000	55399999	-1.05505	4.13704	ENSG00000239555 ENSG00000159387 ENSG00000240760
chr16	55400000	55499999	-0.994815	4.87901
chr16	66500000	66599999	1.11793	-4.57268	ENSG00000247270 ENSG00000166548 ENSG00000223154 ENSG00000217555 ENSG00000254788
chr16	66600000	66699999	1.32144	-3.79805	ENSG00000089505 ENSG00000140932 ENSG00000140931 ENSG00000183723
chr16	66700000	66799999	1.45486	-4.33428	ENSG00000135720 ENSG00000246777
chr16	66800000	66899999	1.45405	-4.52001	ENSG00000177461 ENSG00000249961 ENSG00000159593 ENSG00000258122 ENSG00000168748
chr16	73900000	73999999	-0.774615	5.57007	ENSG00000225178
chr16	74000000	74099999	-0.437029	4.96881
chr16	74100000	74199999	-0.0689122	4.02262
chr16	74200000	74299999	0.34797	3.79472
chr16	80400000	80499999	-1.25817	3.80238
chr16	86400000	86499999	-0.275064	3.89314
chr16	86600000	86699999	-0.2142	4.95874	ENSG00000176692 ENSG00000176678
chr16	87400000	87499999	0.79531	4.12339	ENSG00000140941 ENSG00000140948
chr16	9900000	9999999	0.0312303	-4.13273
chr17	0	99999	0.253177	9.52049	ENSG00000240468 ENSG00000187939
chr17	10400000	10499999	-0.454288	4.24469	ENSG00000125414 ENSG00000109061 ENSG00000214970
chr17	10600000	10699999	-0.364416	5.10332	ENSG00000170222 ENSG00000187824 ENSG00000240813
chr17	10700000	10799999	-0.561142	4.20188	ENSG00000205351 ENSG00000233670 ENSG00000207242 ENSG00000244753 ENSG00000252741
chr17	10800000	10899999	-0.840874	3.98222
chr17	14900000	14999999	-1.02836	5.26232	ENSG00000232058 ENSG00000227767
chr17	15000000	15099999	-0.694496	4.43145
chr17	15100000	15199999	-0.404161	3.85649	ENSG00000109099 ENSG00000238806 ENSG00000230971 ENSG00000237377
chr17	15300000	15399999	-0.0220737	4.79033	ENSG00000239888 ENSG00000234324
chr17	15900000	15999999	0.560826	4.92766	ENSG00000011295 ENSG00000227782 ENSG00000243686 ENSG00000233979
chr17	16000000	16099999	0.678361	3.97018	ENSG00000141027 ENSG00000252383 ENSG00000199674 ENSG00000239221
chr17	25600000	25699999	0.502462	4.87301	ENSG00000239223 ENSG00000213664 ENSG00000109046
chr17	25700000	25799999	0.514754	4.98269
chr17	3200000	3299999	-0.0919566	-4.77524	ENSG00000180068 ENSG00000180042
chr17	34900000	34999999	0.780295	4.68364	ENSG00000005955 ENSG00000236002 ENSG00000108272 ENSG00000129282
chr17	54400000	54499999	-1.19936	3.79752
chr17	54500000	54599999	-1.03151	4.56265
chr17	54600000	54699999	-0.734862	5.07529	ENSG00000243058 ENSG00000183691
chr17	54700000	54799999	-0.206445	4.85153
chr17	56800000	56899999	0.768771	4.41399
chr17	57000000	57099999	0.479204	7.037	ENSG00000240968 ENSG00000242833 ENSG00000216168
chr17	57300000	57399999	0.612559	5.15375	ENSG00000153982 ENSG00000207235
chr17	57400000	57499999	0.813155	4.02396	ENSG00000175155
chr17	59200000	59299999	0.157913	3.84215
chr17	60100000	60199999	0.759968	4.39101	ENSG00000200842 ENSG00000207123
chr17	6500000	6599999	0.460753	3.77456	ENSG00000198920 ENSG00000200914 ENSG00000129235 ENSG00000108590 ENSG00000212734 ENSG00000256806
chr17	70500000	70599999	-0.36302	3.7862
chr17	72000000	72099999	-0.448438	3.85477
chr17	72200000	72299999	0.200702	4.24841	ENSG00000172809 ENSG00000246731 ENSG00000141540 ENSG00000171595
chr17	72300000	72399999	0.295146	3.78443	ENSG00000252785 ENSG00000196169 ENSG00000204347 ENSG00000257008
chr17	77200000	77299999	0.101753	4.41856
chr17	77300000	77399999	-0.106747	4.50921
chr17	77400000	77499999	-0.135005	4.15877
chr17	78600000	78699999	0.674237	5.68654
chr17	78700000	78799999	0.644192	5.15076
chr17	9100000	9199999	0.37682	4.97827
chr17	9200000	9299999	0.0790407	5.20905
chr17	9300000	9399999	-0.194474	5.86372	ENSG00000225751
chr17	9500000	9599999	-0.277249	5.9042	ENSG00000166596 ENSG00000154914
chr17	9600000	9699999	-0.469661	5.55341	ENSG00000184544
chr18	1000000	1099999	0.300473	-4.56005
chr18	13200000	13299999	0.255789	5.18505
chr18	13400000	13499999	-0.0933282	4.58995
chr18	20300000	20399999	1.06631	-7.03585
chr18	20400000	20499999	1.24921	-7.51175	ENSG00000238537
chr18	20500000	20599999	1.36418	-7.85769	ENSG00000101773 ENSG00000242182
chr18	20600000	20699999	1.45848	-6.41188	ENSG00000223023
chr18	20700000	20799999	1.61209	-6.14815	ENSG00000134508 ENSG00000222999
chr18	20800000	20899999	1.54031	-5.83309
chr18	20900000	20999999	1.49538	-5.64858
chr18	21100000	21199999	1.61534	-5.71064	ENSG00000141458 ENSG00000199366 ENSG00000240442
chr18	21200000	21299999	1.5106	-4.60863	ENSG00000154065 ENSG00000239366 ENSG00000215051
chr18	21300000	21399999	1.38518	-4.83886
chr18	21400000	21499999	1.42893	-5.34464	ENSG00000221389
chr18	21500000	21599999	1.37193	-5.15913
chr18	21600000	21699999	1.28223	-3.85306	ENSG00000168234
chr18	21700000	21799999	1.22291	-3.84062	ENSG00000206863 ENSG00000154040 ENSG00000199874 ENSG00000242400 ENSG00000206766
chr18	24000000	24099999	0.743276	-3.71597
chr18	24500000	24599999	0.0781868	-4.17422
chr18	24600000	24699999	0.125382	-4.5357
chr18	24900000	24999999	0.155918	-5.44202	ENSG00000244329
chr18	25000000	25099999	0.0574478	-4.24248
chr18	31900000	31999999	-0.0423335	-3.8323
chr18	32000000	32099999	0.118372	-4.89846
chr18	34800000	34899999	-0.0848474	3.82495
chr18	38300000	38399999	-1.16244	3.98228
chr18	400000	499999	0.780408	-4.2527	ENSG00000158270
chr18	40700000	40799999	-0.852805	3.7605
chr18	4100000	4199999	0.132411	-4.14569
chr18	4200000	4299999	0.184432	-5.75653
chr18	4300000	4399999	0.355855	-6.9096
chr18	4400000	4499999	0.447671	-9.26403
chr18	45600000	45699999	0.10028	5.29037	ENSG00000206944
chr18	45700000	45799999	-0.105276	5.29839
chr18	45800000	45899999	0.00855326	5.19847
chr18	4700000	4799999	-0.244846	-5.2745
chr18	4800000	4899999	-0.520359	-4.71821
chr18	500000	599999	0.954892	-6.57755	ENSG00000177143 ENSG00000222174
chr18	56000000	56099999	1.36187	-4.52756
chr18	56100000	56199999	1.56997	-4.70086	ENSG00000207778 ENSG00000252330
chr18	58100000	58199999	-0.827267	4.57511
chr18	59700000	59799999	0.425569	-4.45685	ENSG00000197563
chr18	59800000	59899999	0.533723	-3.76418
chr18	59900000	59999999	0.795581	-3.80932	ENSG00000134444 ENSG00000199867
chr18	6000000	6099999	-0.627688	-3.92592	ENSG00000200637
chr18	60000000	60099999	1.01399	-3.93764	ENSG00000141655 ENSG00000241088
chr18	67500000	67599999	-0.292557	-4.1508	ENSG00000150637
chr18	67600000	67699999	-0.359409	-3.74439
chr18	71900000	71999999	-0.700747	4.17227	ENSG00000166347
chr18	72000000	72099999	-0.829832	5.91654	ENSG00000206043 ENSG00000235297
chr18	72100000	72199999	-0.750124	4.76355	ENSG00000187773 ENSG00000133313
chr18	73700000	73799999	-1.18754	4.74546
chr18	73800000	73899999	-1.20715	5.97122
chr18	73900000	73999999	-0.98847	7.52841
chr18	74200000	74299999	0.285976	4.3144	ENSG00000220032 ENSG00000247544
chr18	74300000	74399999	0.103249	6.23939	ENSG00000247645
chr18	74600000	74699999	0.0760986	4.39013	ENSG00000130856
chr18	76300000	76399999	-1.12539	3.83467	ENSG00000201723
chr18	76400000	76499999	-1.11291	5.26164
chr18	76900000	76999999	-0.764093	6.26123
chr18	77100000	77199999	-0.396019	5.26847
chr18	77200000	77299999	-0.395383	6.30225	ENSG00000131196
chr18	77300000	77399999	-0.430112	7.26144
chr18	77400000	77499999	-0.244491	8.35584	ENSG00000178412 ENSG00000060069
chr18	77500000	77599999	-0.072574	5.50017
chr18	77800000	77899999	0.615843	3.84698	ENSG00000101546 ENSG00000101544
chr18	900000	999999	0.623598	-6.59958	ENSG00000141433
chr19	15300000	15399999	0.851396	5.18773	ENSG00000105131 ENSG00000141867
chr19	15400000	15499999	0.864112	4.08578	ENSG00000240004 ENSG00000239601 ENSG00000105127
chr19	30200000	30299999	-0.149054	4.42468
chr19	30300000	30399999	-0.277025	5.87508	ENSG00000105173
chr19	30500000	30599999	-0.660667	5.76783
chr19	30600000	30699999	-0.82445	5.03521
chr19	30700000	30799999	-1.01356	5.28554
chr19	30800000	30899999	-1.02801	4.09121
chr19	30900000	30999999	-1.02122	4.38423	ENSG00000198597
chr19	31000000	31099999	-1.07903	4.13809
chr19	31100000	31199999	-1.01384	4.39723	ENSG00000223148
chr19	32500000	32599999	-1.20284	4.52109
chr19	32600000	32699999	-0.91168	4.16525
chr19	32700000	32799999	-0.694218	5.02887	ENSG00000200738
chr19	32800000	32899999	-0.492757	6.48339	ENSG00000168813 ENSG00000249530
chr19	33100000	33199999	0.0535806	3.85323	ENSG00000105186 ENSG00000242325 ENSG00000240614 ENSG00000242436 ENSG00000186326 ENSG00000213965
chr19	34200000	34299999	0.203638	3.77434	ENSG00000153885
chr19	48500000	48599999	1.0469	-5.92201	ENSG00000169393 ENSG00000105507 ENSG00000105499 ENSG00000221595
chr19	48600000	48699999	1.30657	-4.30119	ENSG00000105486 ENSG00000185453
chr19	57300000	57399999	-1.03643	4.07296	ENSG00000198300 ENSG00000249567
chr2	101000000	101099999	-0.623783	4.42355	ENSG00000115526 ENSG00000238029 ENSG00000204640
chr2	106700000	106799999	-0.481215	4.63041	ENSG00000115652 ENSG00000233339
chr2	108500000	108599999	-0.448337	-4.84362	ENSG00000233494 ENSG00000227270 ENSG00000237745 ENSG00000235325
chr2	129100000	129199999	0.243727	5.55475	ENSG00000252742
chr2	129200000	129299999	-0.114009	4.83129	ENSG00000238379 ENSG00000227653
chr2	154100000	154199999	-0.125691	-5.54264
chr2	154200000	154299999	-0.0578777	-4.29966	ENSG00000227708 ENSG00000214024 ENSG00000242575
chr2	154300000	154399999	-0.069793	-4.47552	ENSG00000227400 ENSG00000200377 ENSG00000177519
chr2	154400000	154499999	-0.249281	-3.94791
chr2	154500000	154599999	-0.392567	-3.87853
chr2	155100000	155199999	-0.552968	-4.95104	ENSG00000230251
chr2	156400000	156499999	-0.68714	-3.91546
chr2	156600000	156699999	-0.47567	-4.91592
chr2	156700000	156799999	-0.481825	-4.79996
chr2	156800000	156899999	-0.374502	-5.00487	ENSG00000226383 ENSG00000235548
chr2	157600000	157699999	0.0574269	-5.19621	ENSG00000238069
chr2	157700000	157799999	-0.0389456	-7.06433	ENSG00000252453
chr2	157800000	157899999	-0.282605	-5.58591
chr2	158000000	158099999	-0.249407	-4.07195	ENSG00000213194
chr2	158100000	158199999	-0.241686	-4.0143	ENSG00000136542 ENSG00000222404 ENSG00000136541
chr2	159400000	159499999	-0.0406594	5.63638	ENSG00000227331
chr2	159500000	159599999	0.273127	5.24849	ENSG00000204380 ENSG00000228586 ENSG00000231675
chr2	159800000	159899999	1.0155	4.96987	ENSG00000213189 ENSG00000202029
chr2	165100000	165199999	-0.621128	-4.11349	ENSG00000229641
chr2	166200000	166299999	0.55484	-3.76032
chr2	166400000	166499999	0.754457	-4.86795
chr2	166500000	166599999	0.689854	-4.87425
chr2	166600000	166699999	0.779061	-4.74946	ENSG00000115339 ENSG00000235192 ENSG00000229195 ENSG00000221234 ENSG00000232411
chr2	166700000	166799999	0.789127	-5.98464	ENSG00000123607 ENSG00000224490
chr2	166800000	166899999	0.544899	-6.43598	ENSG00000144285
chr2	166900000	166999999	0.343568	-6.7208	ENSG00000249194 ENSG00000238813
chr2	167800000	167899999	-0.188626	-4.77846
chr2	167900000	167999999	0.249676	-6.14064	ENSG00000254552
chr2	16800000	16899999	-0.769779	4.25214
chr2	168300000	168399999	0.274173	-6.34223
chr2	168400000	168499999	0.0999852	-4.87792	ENSG00000238357
chr2	168500000	168599999	0.114801	-5.5338	ENSG00000214211
chr2	168600000	168699999	0.28845	-4.45333
chr2	168700000	168799999	0.47159	-4.6432	ENSG00000235335 ENSG00000172318
chr2	168800000	168899999	0.661194	-6.46994
chr2	168900000	168999999	0.643042	-5.0267
chr2	169000000	169099999	0.888358	-6.49344	ENSG00000238259
chr2	17400000	17499999	-0.337214	-5.48584	ENSG00000214843
chr2	17500000	17599999	0.116171	-7.10576	ENSG00000236348
chr2	17600000	17699999	0.371929	-7.62179	ENSG00000214842
chr2	17700000	17799999	0.44907	-5.13595	ENSG00000163032
chr2	177000000	177099999	-0.0381251	4.16286	ENSG00000128652 ENSG00000258079 ENSG00000207744 ENSG00000170166 ENSG00000224189 ENSG00000226363 ENSG00000128645 ENSG00000218175
chr2	177100000	177199999	-0.200913	3.82284	ENSG00000230384 ENSG00000128654
chr2	17800000	17899999	0.58074	-4.15286
chr2	181000000	181099999	-0.389749	-4.646
chr2	184100000	184199999	0.45918	-4.1795	ENSG00000213120
chr2	184200000	184299999	0.0153005	-4.85346
chr2	184400000	184499999	-0.576711	-5.02487	ENSG00000177855
chr2	186500000	186599999	-0.687374	-3.95813	ENSG00000212581 ENSG00000226747
chr2	186900000	186999999	-0.366692	-6.36044	ENSG00000237877
chr2	189300000	189399999	0.677527	-6.67887
chr2	189400000	189499999	0.466356	-5.32005
chr2	191500000	191599999	1.02692	-4.86394	ENSG00000138386 ENSG00000228509
chr2	191600000	191699999	1.16653	-5.24919
chr2	191700000	191799999	1.14174	-3.79502	ENSG00000235852 ENSG00000115419
chr2	193100000	193199999	-0.525581	-4.08123
chr2	196100000	196199999	-0.33405	-4.62489
chr2	196200000	196299999	0.135425	-6.9786
chr2	196300000	196399999	0.432591	-4.20014	ENSG00000224099 ENSG00000202206
chr2	19900000	19999999	-0.100951	4.00901	ENSG00000235911
chr2	20000000	20099999	0.517373	4.5052	ENSG00000213403 ENSG00000228784 ENSG00000183891
chr2	200800000	200899999	1.11165	-4.1291	ENSG00000162971 ENSG00000162972
chr2	200900000	200999999	1.15599	-5.66383
chr2	201000000	201099999	1.11867	-6.53023
chr2	201100000	201199999	1.3124	-5.66628
chr2	201200000	201299999	1.327	-4.42536	ENSG00000196141 ENSG00000201649
chr2	201300000	201399999	1.19207	-3.75359	ENSG00000155729
chr2	208300000	208399999	1.40189	-4.02003
chr2	209200000	209299999	0.626987	-3.98499	ENSG00000213081
chr2	209300000	209399999	0.243721	-4.43922	ENSG00000227430 ENSG00000231896 ENSG00000232409
chr2	209400000	209499999	-0.21809	-4.50635
chr2	209800000	209899999	-0.403243	-4.27531
chr2	209900000	209999999	-0.208098	-5.64554	ENSG00000235864
chr2	218600000	218699999	0.156738	5.81364	ENSG00000231035 ENSG00000256309
chr2	218700000	218799999	0.410033	4.61939
chr2	224200000	224299999	-0.423523	-4.94649	ENSG00000233299 ENSG00000221064
chr2	224300000	224399999	-0.0153941	-4.86938	ENSG00000231189 ENSG00000235610
chr2	224400000	224499999	0.372398	-4.91339	ENSG00000171951
chr2	224500000	224599999	0.597292	-5.60441	ENSG00000226539
chr2	224600000	224699999	0.750504	-5.28975	ENSG00000152056
chr2	233700000	233799999	0.540877	3.79659	ENSG00000182600
chr2	234800000	234899999	-0.532875	5.91912	ENSG00000144481 ENSG00000237581
chr2	235100000	235199999	-0.0920824	4.96103
chr2	236100000	236199999	-0.195853	5.05488
chr2	236200000	236299999	-0.19511	5.45482	ENSG00000216002
chr2	237400000	237499999	-0.23578	5.88825	ENSG00000144476
chr2	237500000	237599999	-0.470359	5.7656
chr2	237600000	237699999	-0.631079	5.36328	ENSG00000232328
chr2	237700000	237799999	-0.580708	5.05897
chr2	239600000	239699999	-0.606111	6.25976	ENSG00000234279 ENSG00000224252 ENSG00000226992
chr2	240100000	240199999	-0.685977	4.94024
chr2	240200000	240299999	-0.666095	5.85509
chr2	241300000	241399999	-0.127015	6.31427	ENSG00000063660 ENSG00000218416 ENSG00000255735 ENSG00000207611
chr2	241500000	241599999	0.197674	4.78891	ENSG00000188542 ENSG00000142327 ENSG00000142330 ENSG00000178623
chr2	241800000	241899999	0.520882	4.77252	ENSG00000172482 ENSG00000172478 ENSG00000226321
chr2	241900000	241999999	0.642144	7.69659	ENSG00000233392 ENSG00000223991 ENSG00000162804 ENSG00000229996 ENSG00000225521
chr2	28600000	28699999	0.592652	3.82354	ENSG00000229951 ENSG00000075426 ENSG00000227938 ENSG00000242915
chr2	28900000	28999999	0.618065	4.31338	ENSG00000222232 ENSG00000226833
chr2	2900000	2999999	-1.00815	4.51157
chr2	3000000	3099999	-0.817048	4.41545	ENSG00000238722
chr2	3100000	3199999	-0.539313	4.50926	ENSG00000236760 ENSG00000226649
chr2	36200000	36299999	-0.61715	-5.32916
chr2	36300000	36399999	-0.423018	-6.23611
chr2	36400000	36499999	-0.144311	-6.6042
chr2	36500000	36599999	0.352461	-8.44521	ENSG00000233752
chr2	36700000	36799999	0.922194	-4.18829	ENSG00000217075
chr2	36800000	36899999	1.00643	-4.12479	ENSG00000171055 ENSG00000256845
chr2	37500000	37599999	1.45702	-4.25042	ENSG00000115825 ENSG00000232028 ENSG00000207364 ENSG00000115828
chr2	37600000	37699999	1.4095	-3.98282	ENSG00000253078 ENSG00000238794
chr2	49700000	49799999	-0.927732	-4.80826
chr2	55700000	55799999	1.07984	-4.54334	ENSG00000239189 ENSG00000163001 ENSG00000212175
chr2	55800000	55899999	0.759913	-3.85228	ENSG00000138041 ENSG00000239996 ENSG00000138035
chr2	5600000	5699999	-0.957343	4.01868	ENSG00000232835
chr2	58100000	58199999	-0.216128	-4.24345
chr2	58200000	58299999	-0.0125981	-5.99813	ENSG00000251738
chr2	58400000	58499999	0.252385	-3.90052	ENSG00000115392 ENSG00000233426
chr2	59000000	59099999	-0.315872	-4.56626
chr2	63200000	63299999	0.586848	-5.61885	ENSG00000231609 ENSG00000115507
chr2	63700000	63799999	0.786899	-6.99524	ENSG00000203415
chr2	63800000	63899999	1.01206	-7.26489	ENSG00000014641 ENSG00000228305 ENSG00000229920
chr2	64000000	64099999	1.4041	-5.829	ENSG00000169764
chr2	64200000	64299999	1.35033	-3.94057
chr2	68400000	68499999	0.464732	-5.28126	ENSG00000221823 ENSG00000216115 ENSG00000221619
chr2	68500000	68599999	0.471472	-4.68981	ENSG00000221443 ENSG00000119865 ENSG00000203395
chr2	71900000	71999999	0.0118881	5.79539
chr2	72000000	72099999	-0.323261	6.4143
chr2	72100000	72199999	-0.579141	6.93675
chr2	72200000	72299999	-0.558158	6.66862	ENSG00000233971
chr2	72300000	72399999	-0.249538	5.38799	ENSG00000003137
chr2	72500000	72599999	-0.339685	4.85918	ENSG00000228568
chr2	76400000	76499999	-0.403216	-4.06357	ENSG00000228209
chr2	76500000	76599999	-0.169442	-4.08571
chr2	76600000	76699999	0.106893	-5.32098	ENSG00000200488
chr2	76700000	76799999	0.172087	-5.14439
chr2	76800000	76899999	0.144832	-5.00786	ENSG00000251947
chr2	76900000	76999999	0.15955	-5.07842
chr2	77100000	77199999	0.252909	-4.8025
chr2	77200000	77299999	0.282297	-5.37607	ENSG00000234653
chr2	77500000	77599999	-0.0881866	-4.51212
chr2	82200000	82299999	-0.62117	-3.82206	ENSG00000231781
chr2	84600000	84699999	-0.562942	6.70863	ENSG00000163541
chr2	86500000	86599999	0.146512	4.08394	ENSG00000068615 ENSG00000202537 ENSG00000251974
chr2	86700000	86799999	-0.00486263	5.56302	ENSG00000249884 ENSG00000200563
chr2	86900000	86999999	-0.190999	4.64064	ENSG00000153561
chr2	8800000	8899999	0.0750641	4.83109	ENSG00000235092 ENSG00000115738
chr2	95900000	95999999	-0.181099	6.89866	ENSG00000155066
chr2	98300000	98399999	0.516437	3.81169	ENSG00000228486 ENSG00000115085
chr2	98500000	98599999	0.11615	4.36969	ENSG00000238719
chr2	98700000	98799999	-0.247176	3.95136
chr20	10300000	10399999	0.383629	-3.90997	ENSG00000237005 ENSG00000214835 ENSG00000211588 ENSG00000230750
chr20	12700000	12799999	-0.293041	-4.37657
chr20	12800000	12899999	-0.175897	-4.977	ENSG00000233048
chr20	12900000	12999999	-0.0231079	-7.05812	ENSG00000235234 ENSG00000234265
chr20	13000000	13099999	-0.000821447	-4.76235	ENSG00000172296 ENSG00000238144
chr20	19500000	19599999	-1.21678	4.58726	ENSG00000216017
chr20	19600000	19699999	-0.901604	5.54667	ENSG00000232675
chr20	19700000	19799999	-0.598081	4.53015	ENSG00000239120 ENSG00000233895
chr20	19900000	19999999	-0.267908	4.14607	ENSG00000132669
chr20	20000000	20099999	-0.39955	7.50129	ENSG00000173418 ENSG00000101343 ENSG00000241054
chr20	20100000	20199999	-0.573752	5.36773	ENSG00000225417
chr20	33300000	33399999	1.626	-4.86151	ENSG00000198646
chr20	33400000	33499999	1.66629	-4.22658	ENSG00000225336 ENSG00000131067 ENSG00000131069
chr20	33900000	33999999	1.79594	-5.02366	ENSG00000101019
chr20	41600000	41699999	-1.32007	4.09059	ENSG00000223190
chr20	41700000	41799999	-1.19437	4.43733
chr20	41800000	41899999	-0.967481	5.14519	ENSG00000233508 ENSG00000240639 ENSG00000226038
chr20	41900000	41999999	-0.535712	3.74681	ENSG00000252193
chr20	42500000	42599999	0.23471	4.34885	ENSG00000233277
chr20	4400000	4499999	0.0660575	4.63078	ENSG00000236387 ENSG00000238282
chr20	4500000	4599999	0.0973414	5.24515	ENSG00000228210
chr20	4600000	4699999	0.416882	7.10052	ENSG00000226948 ENSG00000171867
chr20	4700000	4799999	0.662319	4.16446	ENSG00000171864 ENSG00000180259 ENSG00000231071 ENSG00000101265
chr20	50000000	50099999	0.526046	3.76101	ENSG00000101096
chr20	51000000	51099999	-0.844287	4.59664	ENSG00000225785
chr20	51100000	51199999	-1.05386	4.29535	ENSG00000232465 ENSG00000234821
chr20	51200000	51299999	-1.25077	4.90905	ENSG00000240314 ENSG00000232294
chr20	51300000	51399999	-1.34628	5.6278
chr20	51400000	51499999	-1.24578	4.78821	ENSG00000232286
chr20	51500000	51599999	-1.18041	3.93129	ENSG00000230636
chr20	53300000	53399999	-1.05191	3.74312
chr20	54500000	54599999	-1.30025	4.15627	ENSG00000054803
chr20	54600000	54699999	-1.24521	6.27949
chr20	54700000	54799999	-0.999028	5.96328	ENSG00000222118
chr20	56100000	56199999	-0.0216759	3.789	ENSG00000251422 ENSG00000124253 ENSG00000227297 ENSG00000124256
chr20	56200000	56299999	-0.0817856	5.03827	ENSG00000124225
chr20	57900000	57999999	-1.03156	3.82656	ENSG00000225129 ENSG00000230352
chr20	60000000	60099999	-0.71259	3.91332
chr20	800000	899999	0.501028	4.09686	ENSG00000125898 ENSG00000101278 ENSG00000251390 ENSG00000101280
chr21	15900000	15999999	-0.257029	-3.86782	ENSG00000155307 ENSG00000243440 ENSG00000223662
chr21	16000000	16099999	-0.269262	-4.27856
chr21	36100000	36199999	-0.328828	3.78781	ENSG00000230978 ENSG00000234380
chr21	40000000	40099999	-0.682763	4.26023
chr21	47100000	47199999	0.541273	4.51626	ENSG00000231820
chr22	20100000	20199999	0.945151	4.09185	ENSG00000099899 ENSG00000099901 ENSG00000240816 ENSG00000099904 ENSG00000234409 ENSG00000249923 ENSG00000236499
chr22	24800000	24899999	1.56724	-4.46569	ENSG00000128271 ENSG00000178803 ENSG00000100024
chr22	40800000	40899999	1.66326	-5.9906	ENSG00000227413
chr22	44600000	44699999	0.269549	4.01664	ENSG00000138944
chr22	44800000	44899999	0.306238	4.34756	ENSG00000236079 ENSG00000232655 ENSG00000228807 ENSG00000188636
chr22	47000000	47099999	0.79527	4.05575	ENSG00000075240 ENSG00000249879
chr22	47600000	47699999	-0.834514	4.91828
chr3	106500000	106599999	0.0692748	-5.24091	ENSG00000239997
chr3	106600000	106699999	0.0708327	-5.37524	ENSG00000244233 ENSG00000243484 ENSG00000244028 ENSG00000241787 ENSG00000239632 ENSG00000243860 ENSG00000242214 ENSG00000242836 ENSG00000249580 ENSG00000243432 ENSG00000243658 ENSG00000240034 ENSG00000250630 ENSG00000239586 ENSG00000239747 ENSG00000239496 ENSG00000240796 ENSG00000241264
chr3	106700000	106799999	0.157239	-4.39743	ENSG00000252626
chr3	109400000	109499999	-0.498944	-5.18528	ENSG00000242029
chr3	110200000	110299999	-0.113305	-4.16017	ENSG00000240895 ENSG00000221206
chr3	111800000	111899999	1.10872	-5.59716	ENSG00000114529 ENSG00000207940 ENSG00000174500
chr3	112100000	112199999	1.19761	-6.80446	ENSG00000243081
chr3	112400000	112499999	1.13073	-3.97363	ENSG00000242308 ENSG00000240893
chr3	115400000	115499999	0.427189	-4.13711	ENSG00000221098
chr3	115500000	115599999	0.398838	-4.73618	ENSG00000243359
chr3	115600000	115699999	0.176213	-5.87464
chr3	115700000	115799999	0.127404	-6.93035
chr3	115900000	115999999	-0.335559	-3.72477
chr3	121200000	121299999	0.710203	-3.99384	ENSG00000051341 ENSG00000242445 ENSG00000186103
chr3	126700000	126799999	0.129503	4.00173	ENSG00000114554
chr3	127000000	127099999	-0.314726	4.97672	ENSG00000239620 ENSG00000244215
chr3	127100000	127199999	-0.116356	5.10819
chr3	127300000	127399999	0.248432	4.32333	ENSG00000163870 ENSG00000073111 ENSG00000114631 ENSG00000221413 ENSG00000114626
chr3	127400000	127499999	0.289115	3.76645	ENSG00000074416
chr3	127500000	127599999	0.215355	3.99158
chr3	127600000	127699999	0.188847	4.99115	ENSG00000187715 ENSG00000201210
chr3	127900000	127999999	0.758105	4.61391
chr3	131400000	131499999	-0.443845	-4.21967
chr3	133300000	133399999	0.29341	3.8766	ENSG00000091527 ENSG00000163781 ENSG00000252641
chr3	133400000	133499999	0.177056	4.94274	ENSG00000242337 ENSG00000201394 ENSG00000091513 ENSG00000244062
chr3	133500000	133599999	0.337868	5.45543	ENSG00000144867 ENSG00000154917
chr3	133600000	133699999	0.529716	4.3948	ENSG00000221972
chr3	146200000	146299999	0.0374315	-4.08003	ENSG00000188313 ENSG00000199812
chr3	146300000	146399999	-0.182227	-5.72817	ENSG00000231213 ENSG00000241457
chr3	146400000	146499999	-0.338329	-5.61925
chr3	146500000	146599999	-0.512431	-4.8398
chr3	146800000	146899999	-0.458546	-4.28608
chr3	148700000	148799999	1.09559	-6.36412	ENSG00000241627 ENSG00000163754 ENSG00000071794
chr3	148800000	148899999	1.15011	-6.25203	ENSG00000239718 ENSG00000201031 ENSG00000240511 ENSG00000163755
chr3	149100000	149199999	1.22782	-4.73173	ENSG00000243885 ENSG00000240246 ENSG00000241929 ENSG00000239408
chr3	149200000	149299999	1.34399	-3.84067	ENSG00000169903 ENSG00000244503 ENSG00000252581
chr3	149600000	149699999	1.00067	-4.50867	ENSG00000082996 ENSG00000252172 ENSG00000239351 ENSG00000242791
chr3	149700000	149799999	1.00289	-5.17108	ENSG00000070087 ENSG00000224831 ENSG00000182000 ENSG00000241947 ENSG00000240477 ENSG00000243321 ENSG00000238968
chr3	149900000	149999999	1.14913	-4.35996	ENSG00000241048 ENSG00000244541 ENSG00000243550
chr3	150900000	150999999	0.191713	-4.10045	ENSG00000199994 ENSG00000174946 ENSG00000174944 ENSG00000239570
chr3	152300000	152399999	-0.060042	-3.7635	ENSG00000244545
chr3	152400000	152499999	-0.108567	-4.76859
chr3	152600000	152699999	-0.352192	-4.11132	ENSG00000243084 ENSG00000242331
chr3	154900000	154999999	0.33812	-4.3254	ENSG00000241336
chr3	155000000	155099999	0.475257	-5.04353	ENSG00000240045 ENSG00000242790 ENSG00000239443 ENSG00000248772
chr3	155100000	155199999	0.524784	-4.3562	ENSG00000243518 ENSG00000242152 ENSG00000243835 ENSG00000239508
chr3	155200000	155299999	0.572025	-3.86205	ENSG00000242925
chr3	156500000	156599999	0.0344759	3.74522	ENSG00000230457
chr3	15900000	15999999	0.672861	4.49307	ENSG00000207815 ENSG00000224728
chr3	159900000	159999999	-0.0999917	4.04262	ENSG00000180044 ENSG00000244078
chr3	160300000	160399999	0.0134514	5.99872	ENSG00000242285 ENSG00000179674
chr3	160400000	160499999	-0.266777	6.47925	ENSG00000207084 ENSG00000243644
chr3	160500000	160599999	-0.592494	5.26514
chr3	160700000	160799999	-0.735162	4.02158
chr3	16400000	16499999	0.81505	-4.28247	ENSG00000131378
chr3	16500000	16599999	0.992745	-4.61462	ENSG00000233570
chr3	167100000	167199999	-0.543189	-4.95609	ENSG00000241669 ENSG00000114204
chr3	168000000	168099999	-0.093978	-4.71868	ENSG00000241882
chr3	168100000	168199999	-0.0357251	-5.89819	ENSG00000222357
chr3	168200000	168299999	-0.0549416	-6.43673	ENSG00000207717
chr3	16900000	16999999	0.531136	-3.93568
chr3	17000000	17099999	0.357555	-3.94801	ENSG00000226441
chr3	170400000	170499999	0.868261	-4.91457	ENSG00000239739
chr3	170600000	170699999	0.694316	-5.12677	ENSG00000163577 ENSG00000240704
chr3	172700000	172799999	-0.0129116	-5.58269
chr3	172800000	172899999	-0.131207	-5.56522
chr3	172900000	172999999	-0.139981	-5.81829	ENSG00000237473
chr3	173000000	173099999	-0.151578	-5.21647
chr3	173300000	173399999	-0.326001	-3.72903	ENSG00000237645
chr3	173500000	173599999	-0.335795	-3.80118
chr3	173700000	173799999	-0.177324	-4.18596	ENSG00000252982
chr3	173800000	173899999	-0.0255378	-5.8238
chr3	173900000	173999999	0.0750058	-6.53785
chr3	174100000	174199999	0.0157919	-4.39683
chr3	175800000	175899999	-0.167151	-5.93792	ENSG00000238026
chr3	175900000	175999999	-0.0375638	-4.99227
chr3	17600000	17699999	0.247069	-5.49795
chr3	176000000	176099999	-0.0686187	-4.5645
chr3	176100000	176199999	-0.057014	-4.73489
chr3	176200000	176299999	-0.117006	-4.10684
chr3	17800000	17899999	0.550094	-6.52554
chr3	178900000	178999999	0.444897	4.99778	ENSG00000121879 ENSG00000171121 ENSG00000240429
chr3	17900000	17999999	0.212876	-4.62095	ENSG00000213383 ENSG00000214286
chr3	179800000	179899999	-0.493776	-3.95315	ENSG00000201822
chr3	18000000	18099999	0.0586464	-4.21108	ENSG00000226238
chr3	18100000	18199999	0.0826384	-5.46351
chr3	18200000	18299999	-0.0896624	-3.89827
chr3	183100000	183199999	0.922382	-4.99502	ENSG00000240024 ENSG00000201229 ENSG00000253092 ENSG00000199363 ENSG00000251730
chr3	18600000	18699999	-0.414708	-4.68987
chr3	18700000	18799999	-0.589746	-5.7691
chr3	187100000	187199999	0.623381	-4.01099	ENSG00000239093 ENSG00000228952
chr3	18800000	18899999	-0.690468	-5.12018
chr3	18900000	18999999	-0.53955	-4.43027	ENSG00000251761
chr3	190700000	190799999	-0.493566	-4.60613
chr3	190800000	190899999	-0.213224	-6.10419
chr3	190900000	190999999	-0.0471143	-6.61642	ENSG00000188729 ENSG00000233308
chr3	191100000	191199999	-0.0796121	-5.59414	ENSG00000253548
chr3	191200000	191299999	-0.187846	-5.09356	ENSG00000223812
chr3	191300000	191399999	-0.160559	-5.21099	ENSG00000201860 ENSG00000200270
chr3	191500000	191599999	-0.112259	-5.34435
chr3	191600000	191699999	-0.206431	-5.37667	ENSG00000237653 ENSG00000216020
chr3	191700000	191799999	-0.179276	-4.17404	ENSG00000232353
chr3	191800000	191899999	-0.197028	-4.15946	ENSG00000222583
chr3	191900000	191999999	-0.377807	-4.13363	ENSG00000231383
chr3	192000000	192099999	-0.439549	-4.78649
chr3	193200000	193299999	-0.188283	4.34647	ENSG00000127249 ENSG00000225473
chr3	193400000	193499999	0.479043	4.73662	ENSG00000243991 ENSG00000223986
chr3	193500000	193599999	0.633363	5.8814	ENSG00000229155
chr3	193600000	193699999	0.544759	5.02708	ENSG00000214146
chr3	193700000	193799999	0.558143	4.51771	ENSG00000238043 ENSG00000224403 ENSG00000230102
chr3	193800000	193899999	0.618028	4.57249	ENSG00000229964 ENSG00000232874 ENSG00000114315 ENSG00000242201 ENSG00000240226
chr3	193900000	193999999	0.667409	4.17904	ENSG00000225742 ENSG00000238097 ENSG00000228271
chr3	194100000	194199999	0.961819	4.72942	ENSG00000178732 ENSG00000133657
chr3	194300000	194399999	0.812176	4.829	ENSG00000231770 ENSG00000145014 ENSG00000229334 ENSG00000041802 ENSG00000221718
chr3	194400000	194499999	0.388352	7.23151	ENSG00000185112 ENSG00000233987 ENSG00000237222 ENSG00000234805 ENSG00000230401 ENSG00000244576
chr3	194500000	194599999	0.165682	6.59078	ENSG00000240295 ENSG00000238031
chr3	194600000	194699999	0.233167	5.35337
chr3	194700000	194799999	0.470512	4.01386
chr3	23200000	23299999	0.599544	-4.76052	ENSG00000233153
chr3	23400000	23499999	0.682704	-8.87486	ENSG00000228171 ENSG00000221506
chr3	23500000	23599999	0.871746	-6.85266
chr3	23600000	23699999	1.2339	-6.209	ENSG00000252562 ENSG00000212269
chr3	23700000	23799999	1.33041	-5.48107
chr3	24200000	24299999	0.104942	-3.78753
chr3	27300000	27399999	0.374703	-3.87617	ENSG00000207251
chr3	31500000	31599999	-0.267236	4.13511
chr3	38500000	38599999	0.38221	4.58674	ENSG00000114739 ENSG00000157036 ENSG00000207512 ENSG00000230683 ENSG00000232439
chr3	38600000	38699999	0.223492	4.2995	ENSG00000183873
chr3	41200000	41299999	0.0174727	6.8576	ENSG00000233919 ENSG00000168036
chr3	60500000	60599999	-0.115782	-5.53894
chr3	60600000	60699999	-0.0322272	-5.11135	ENSG00000240097 ENSG00000232407
chr3	60700000	60799999	-0.0823023	-4.07878	ENSG00000225673 ENSG00000244183
chr3	60800000	60899999	-0.10051	-4.3374	ENSG00000212211
chr3	61100000	61199999	0.118555	-4.26434
chr3	61200000	61299999	0.456909	-4.4921
chr3	62500000	62599999	0.659427	-3.87173
chr3	62600000	62699999	0.50662	-4.16045
chr3	62700000	62799999	0.459544	-4.93317	ENSG00000225662 ENSG00000244632
chr3	62800000	62899999	0.380915	-4.50155	ENSG00000252449
chr3	62900000	62999999	0.270516	-4.49303	ENSG00000226082
chr3	63000000	63099999	0.243576	-4.5137	ENSG00000244342 ENSG00000242841
chr3	63900000	63999999	0.881657	-3.87327	ENSG00000163635 ENSG00000239653 ENSG00000243410
chr3	69400000	69499999	-0.300347	4.41789
chr3	69500000	69599999	-0.566036	4.93072	ENSG00000239263 ENSG00000240265
chr3	69600000	69699999	-0.674688	6.06189	ENSG00000240842 ENSG00000241667
chr3	69700000	69799999	-0.416988	4.4582
chr3	72200000	72299999	0.202513	5.35137	ENSG00000243083 ENSG00000242618
chr3	72300000	72399999	0.363368	6.1773	ENSG00000212070
chr3	72500000	72599999	0.328305	6.25494	ENSG00000244345
chr3	72700000	72799999	0.526077	4.35809	ENSG00000222838
chr3	75900000	75999999	-0.146816	-4.62363
chr3	76000000	76099999	-0.146412	-4.82719	ENSG00000222883
chr3	76100000	76199999	-0.167514	-5.36281
chr3	76300000	76399999	-0.112176	-4.28028
chr3	76400000	76499999	-0.166643	-4.83412	ENSG00000212104 ENSG00000240809
chr3	78200000	78299999	-0.418737	-5.48912	ENSG00000222574
chr3	78300000	78399999	-0.245914	-4.57545	ENSG00000240241
chr3	90000000	90099999	-0.50384	-4.10076	ENSG00000212598
chr3	97900000	97999999	-0.0366058	-4.42112	ENSG00000249321 ENSG00000249975 ENSG00000248507 ENSG00000187900 ENSG00000230301
chr4	100500000	100599999	-0.673524	7.54132	ENSG00000138823 ENSG00000248676 ENSG00000248713
chr4	100700000	100799999	-0.604873	7.12259	ENSG00000070190
chr4	100800000	100899999	-0.254514	4.68767	ENSG00000109270 ENSG00000164031 ENSG00000164032
chr4	100900000	100999999	-0.649285	6.0867	ENSG00000250403 ENSG00000248820
chr4	101000000	101099999	-0.725824	4.27635	ENSG00000222196
chr4	10400000	10499999	-0.54967	4.45305	ENSG00000250613 ENSG00000178163 ENSG00000248419
chr4	105000000	105099999	-0.618531	-3.81123
chr4	106800000	106899999	-0.334016	3.7325	ENSG00000168743 ENSG00000250740
chr4	110100000	110199999	0.104726	-4.01775
chr4	114300000	114399999	0.9998	-4.81743	ENSG00000239279 ENSG00000206820
chr4	115100000	115199999	-0.00615282	-4.68493
chr4	1200000	1299999	0.585878	4.76942	ENSG00000246629 ENSG00000159692 ENSG00000196810 ENSG00000249548
chr4	126400000	126499999	0.136278	-3.84246
chr4	126500000	126599999	0.17082	-5.71744
chr4	126600000	126699999	0.202816	-6.40832	ENSG00000250149 ENSG00000251436 ENSG00000249555
chr4	128700000	128799999	0.920723	-3.77546	ENSG00000164070 ENSG00000244021
chr4	1300000	1399999	0.476155	4.01757	ENSG00000090316 ENSG00000163945 ENSG00000254094 ENSG00000253399 ENSG00000179979 ENSG00000235608
chr4	133400000	133499999	-0.703276	-3.78597
chr4	13400000	13499999	0.321689	-4.71072	ENSG00000157869
chr4	13500000	13599999	0.431879	-3.77534	ENSG00000249512 ENSG00000109705 ENSG00000246095 ENSG00000038219
chr4	13600000	13699999	0.314191	-4.42279	ENSG00000249148 ENSG00000242209 ENSG00000252092
chr4	13700000	13799999	-0.299894	-3.80022	ENSG00000250497
chr4	144300000	144399999	-0.0801201	4.00129	ENSG00000109458 ENSG00000243175
chr4	145900000	145999999	-0.179104	3.77119	ENSG00000164162 ENSG00000222594
chr4	147300000	147399999	-0.640345	3.74864
chr4	147400000	147499999	-0.733275	5.00585
chr4	147700000	147799999	-0.720034	4.52696
chr4	147800000	147899999	-0.623453	4.75996	ENSG00000248764 ENSG00000248346
chr4	147900000	147999999	-0.579812	5.50005
chr4	148000000	148099999	-0.461657	3.8655
chr4	164500000	164599999	-0.624174	-3.93925
chr4	164600000	164699999	-0.632793	-4.19616
chr4	165200000	165299999	-0.624728	-4.86074
chr4	16600000	16699999	0.589542	-4.32927
chr4	16700000	16799999	0.794308	-4.57646
chr4	167500000	167599999	-0.606263	-3.78977
chr4	16800000	16899999	0.760821	-4.62118
chr4	16900000	16999999	0.753828	-5.09053
chr4	17000000	17099999	0.855558	-6.56784	ENSG00000249998 ENSG00000251212
chr4	17100000	17199999	0.744679	-6.78094	ENSG00000250819
chr4	17200000	17299999	0.541494	-6.4389
chr4	17300000	17399999	0.317768	-4.1319	ENSG00000206780
chr4	175000000	175099999	-0.409026	-4.68922	ENSG00000248174 ENSG00000250957 ENSG00000251213
chr4	175100000	175199999	-0.1836	-3.78611	ENSG00000164117
chr4	175200000	175299999	0.0469915	-4.91706	ENSG00000164118 ENSG00000249875
chr4	182600000	182699999	0.0470144	-4.36778
chr4	182700000	182799999	0.3655	-5.91736	ENSG00000251336 ENSG00000251742
chr4	182800000	182899999	0.690205	-6.75946	ENSG00000251433
chr4	182900000	182999999	0.711311	-5.19409
chr4	183000000	183099999	0.698721	-4.78112	ENSG00000248266 ENSG00000221227
chr4	183100000	183199999	0.726662	-4.6559
chr4	183200000	183299999	0.508047	-4.91357
chr4	183400000	183499999	0.313951	-4.28956	ENSG00000252343
chr4	189400000	189499999	-0.422384	-3.74253
chr4	189500000	189599999	-0.531934	-3.93729	ENSG00000250523
chr4	190700000	190799999	-1.02298	4.56111	ENSG00000245685
chr4	190800000	190899999	-0.65501	3.98648	ENSG00000250666 ENSG00000240387 ENSG00000109536 ENSG00000249462
chr4	23700000	23799999	-0.160076	-4.18762	ENSG00000251292 ENSG00000249453
chr4	23900000	23999999	-0.0732984	-3.71994
chr4	24200000	24299999	0.135165	-4.34206
chr4	24300000	24399999	0.286069	-4.57836
chr4	24400000	24499999	0.552702	-3.85226	ENSG00000222262
chr4	24600000	24699999	0.832822	-4.84368	ENSG00000249256
chr4	24700000	24799999	0.842759	-5.87643	ENSG00000251638 ENSG00000248444 ENSG00000109610
chr4	24900000	24999999	0.67803	-4.52053
chr4	27100000	27199999	-0.128834	-4.41541	ENSG00000251080
chr4	27200000	27299999	-0.432883	-4.22251	ENSG00000205830 ENSG00000249699 ENSG00000222206 ENSG00000251325
chr4	27400000	27499999	-0.684516	-3.74656
chr4	36600000	36699999	-0.582643	-3.90165
chr4	38200000	38299999	0.21714	4.86324	ENSG00000221495 ENSG00000243573 ENSG00000242346 ENSG00000239860 ENSG00000251642
chr4	38300000	38399999	-0.0780961	5.61818	ENSG00000248227
chr4	38500000	38599999	-0.159574	5.16331	ENSG00000249667 ENSG00000251635
chr4	38600000	38699999	0.113289	4.13565	ENSG00000231160 ENSG00000196355 ENSG00000109787
chr4	47000000	47099999	-0.403099	-4.32458
chr4	48900000	48999999	0.949143	3.88069	ENSG00000252913 ENSG00000251334
chr4	52700000	52799999	-0.557596	8.20712	ENSG00000109184 ENSG00000250473
chr4	52900000	52999999	-0.537969	6.69033	ENSG00000251040 ENSG00000163071
chr4	54600000	54699999	-0.245398	3.95642
chr4	54700000	54799999	-0.136301	4.24246	ENSG00000249706 ENSG00000250815
chr4	55000000	55099999	-0.0834474	3.75568	ENSG00000239534 ENSG00000242670
chr4	55200000	55299999	-0.852887	5.7831	ENSG00000248184 ENSG00000248518
chr4	62800000	62899999	0.253854	-4.40347
chr4	62900000	62999999	0.265884	-5.88485	ENSG00000248692 ENSG00000225405
chr4	63000000	63099999	-0.00247423	-5.53303
chr4	63100000	63199999	-0.310788	-4.63589	ENSG00000241344 ENSG00000250249
chr4	67800000	67899999	-0.859873	-3.84718
chr4	69300000	69399999	0.440247	-4.32046	ENSG00000087128 ENSG00000250566
chr4	7000000	7099999	0.783022	4.90006	ENSG00000245748 ENSG00000173013 ENSG00000173011 ENSG00000109519
chr4	7300000	7399999	-0.161327	5.27428
chr4	78800000	78899999	0.626042	-3.90002	ENSG00000169288 ENSG00000248926 ENSG00000248956
chr4	79100000	79199999	0.299316	-3.92749	ENSG00000249565 ENSG00000221183
chr4	79500000	79599999	1.13223	-4.10773	ENSG00000138772 ENSG00000200998 ENSG00000238816 ENSG00000251442 ENSG00000251019
chr4	80300000	80399999	-0.286533	-4.42186	ENSG00000196475
chr4	80500000	80599999	-0.222568	-4.3039	ENSG00000249646 ENSG00000251399
chr4	84600000	84699999	0.146211	-3.76705	ENSG00000249171
chr4	84700000	84799999	0.126973	-4.53842
chr4	84800000	84899999	0.159857	-4.68805
chr4	89600000	89699999	0.70253	-6.00435	ENSG00000207524 ENSG00000177432 ENSG00000248019
chr4	89700000	89799999	0.519341	-7.42356
chr4	89800000	89899999	0.15448	-8.83888
chr4	90100000	90199999	-0.198241	-4.01823	ENSG00000185477
chr4	90600000	90699999	0.0923417	-3.87279
chr4	90700000	90799999	0.0083509	-5.85019	ENSG00000145335 ENSG00000247775
chr4	91300000	91399999	-0.383343	-4.26916
chr4	91600000	91699999	-0.536208	-4.24235	ENSG00000251401
chr4	91800000	91899999	-0.333246	-4.811
chr4	91900000	91999999	-0.374751	-4.05548
chr4	92400000	92499999	-0.228467	-4.3444
chr4	93000000	93099999	0.443375	-4.79035
chr4	93200000	93299999	0.242599	-4.03057	ENSG00000248511
chr4	93300000	93399999	0.278531	-3.94716
chr4	93500000	93599999	0.321417	-4.04579
chr4	93600000	93699999	0.258081	-3.83304	ENSG00000241944 ENSG00000251449
chr4	93800000	93899999	0.10687	-4.21487	ENSG00000248750
chr4	94100000	94199999	-0.0196404	-4.44809
chr4	94200000	94299999	0.0280116	-4.32923	ENSG00000250908
chr4	94300000	94399999	0.0182067	-4.90579
chr4	94400000	94499999	-0.109656	-4.3896
chr5	1000000	1099999	0.250111	4.29113	ENSG00000221244 ENSG00000249622 ENSG00000145506 ENSG00000113504
chr5	102300000	102399999	0.0877962	-3.87456	ENSG00000175749
chr5	106300000	106399999	0.281439	-4.61155
chr5	106400000	106499999	0.397164	-4.98045
chr5	106500000	106599999	0.511388	-4.31189	ENSG00000250273
chr5	106800000	106899999	0.84349	-3.96112
chr5	106900000	106999999	0.853454	-4.12726
chr5	109600000	109699999	-0.0687127	-5.17233
chr5	109700000	109799999	0.0276715	-4.54898
chr5	1100000	1199999	0.230523	4.35179	ENSG00000249201
chr5	111600000	111699999	-0.360127	5.49864	ENSG00000248350
chr5	111800000	111899999	0.0264924	5.4373	ENSG00000257082 ENSG00000251014
chr5	112100000	112199999	0.750435	4.33492	ENSG00000134982 ENSG00000250045 ENSG00000212370 ENSG00000258864
chr5	116200000	116299999	0.815468	-4.28373
chr5	116300000	116399999	0.716885	-5.1805	ENSG00000250650 ENSG00000250949
chr5	116400000	116499999	0.673187	-5.98455
chr5	116500000	116599999	0.430338	-5.82414
chr5	116600000	116699999	0.131336	-4.12584	ENSG00000243758
chr5	117200000	117299999	-1.09437	4.17612
chr5	120000000	120099999	-0.161846	-4.91172	ENSG00000222609
chr5	12200000	12299999	-0.0736163	-4.68351	ENSG00000212305
chr5	12300000	12399999	-0.00593489	-4.72047
chr5	12600000	12699999	-0.0245508	-4.66458
chr5	12700000	12799999	-0.129829	-5.49544	ENSG00000251112 ENSG00000249053
chr5	130500000	130599999	0.436942	8.17652	ENSG00000169567 ENSG00000186687
chr5	130800000	130899999	-0.0841921	5.08896
chr5	131300000	131399999	-0.24083	4.78859	ENSG00000223548 ENSG00000231585 ENSG00000164399
chr5	131400000	131499999	-0.0624326	3.83946	ENSG00000164400 ENSG00000253067 ENSG00000227616 ENSG00000235775
chr5	134600000	134699999	-0.0203178	4.05841
chr5	134700000	134799999	-0.123723	4.71355	ENSG00000113648 ENSG00000251380 ENSG00000255833 ENSG00000249639
chr5	134800000	134899999	-0.314286	5.66635	ENSG00000181965
chr5	134900000	134999999	-0.620167	6.0885	ENSG00000250167 ENSG00000145824 ENSG00000251045
chr5	135200000	135299999	-0.586497	6.06617	ENSG00000145839 ENSG00000254239 ENSG00000253927 ENSG00000145826 ENSG00000164616
chr5	140300000	140399999	0.557522	-5.06431	ENSG00000204963 ENSG00000204962 ENSG00000204961 ENSG00000250120 ENSG00000249158 ENSG00000251664 ENSG00000239389 ENSG00000248383 ENSG00000243232
chr5	140400000	140499999	0.59073	-5.8439	ENSG00000171815 ENSG00000112852 ENSG00000113205
chr5	142300000	142399999	1.27316	-4.19539
chr5	145000000	145099999	-0.363557	-3.96436
chr5	146200000	146299999	0.373575	-3.83697	ENSG00000249553
chr5	146300000	146399999	0.375268	-4.38575
chr5	146700000	146799999	0.852709	-4.69888
chr5	146800000	146899999	1.09931	-5.16623	ENSG00000113657
chr5	146900000	146999999	0.996865	-5.13084	ENSG00000248255
chr5	147000000	147099999	0.91548	-4.38108	ENSG00000176049
chr5	147100000	147199999	0.9204	-4.97672
chr5	147200000	147299999	0.946512	-6.38541	ENSG00000164266 ENSG00000249518 ENSG00000164265 ENSG00000178776 ENSG00000248362 ENSG00000251320
chr5	147300000	147399999	0.754763	-5.65986	ENSG00000250346
chr5	147400000	147499999	0.603412	-5.34178	ENSG00000133710
chr5	150600000	150699999	0.600736	3.93961	ENSG00000196743 ENSG00000186334
chr5	153500000	153599999	0.709152	3.92223	ENSG00000037749
chr5	15500000	15599999	0.132973	-4.04662
chr5	156000000	156099999	0.233688	-4.96005
chr5	156100000	156199999	0.301081	-4.90867	ENSG00000254163
chr5	156200000	156299999	0.282407	-5.1028	ENSG00000199468 ENSG00000231989
chr5	156300000	156399999	0.264039	-4.5992	ENSG00000145850
chr5	15900000	15999999	-0.221852	-4.24789	ENSG00000216077
chr5	16000000	16099999	-0.438089	-4.08549	ENSG00000222312
chr5	166600000	166699999	-0.150419	-3.8725
chr5	166700000	166799999	0.028206	-4.36673	ENSG00000254365 ENSG00000254297 ENSG00000253527
chr5	166800000	166899999	0.0357703	-4.96396
chr5	166900000	166999999	0.0261317	-4.41596
chr5	167000000	167099999	-0.0177946	-4.7156	ENSG00000254187
chr5	168200000	168299999	-0.343069	4.44908	ENSG00000202345
chr5	168300000	168399999	-0.568699	4.45818
chr5	168400000	168499999	-0.731059	5.54293	ENSG00000248965 ENSG00000248222
chr5	168600000	168699999	-0.87548	5.41673	ENSG00000241842 ENSG00000207619
chr5	168700000	168799999	-0.837314	4.81787
chr5	168800000	168899999	-0.836904	4.02458
chr5	169700000	169799999	0.458219	-4.0106	ENSG00000250274 ENSG00000235172
chr5	172600000	172699999	0.653267	5.05492	ENSG00000243470 ENSG00000254200 ENSG00000183072 ENSG00000201277
chr5	172800000	172899999	0.537426	-4.56441	ENSG00000253968
chr5	173500000	173599999	-0.18707	4.81127	ENSG00000170091 ENSG00000253447
chr5	174000000	174099999	-0.500879	3.95213	ENSG00000250256 ENSG00000248929
chr5	174100000	174199999	-0.451012	5.87135	ENSG00000120149
chr5	18300000	18399999	0.263057	-4.50762
chr5	18400000	18499999	0.418093	-5.85197
chr5	18500000	18599999	0.389142	-4.69944	ENSG00000241552
chr5	18600000	18699999	0.405239	-5.46286
chr5	18700000	18799999	0.394835	-5.26575	ENSG00000248693
chr5	18800000	18899999	0.273083	-4.75855	ENSG00000238674 ENSG00000249191 ENSG00000249927
chr5	19700000	19799999	-0.446978	-3.86989
chr5	20700000	20799999	0.0688203	-7.65812
chr5	21300000	21399999	0.0244588	-4.57049	ENSG00000249359
chr5	21900000	21999999	-0.0225906	-5.87663
chr5	25400000	25499999	0.0713989	-4.84071	ENSG00000248605
chr5	25500000	25599999	0.0164533	-4.27839
chr5	35000000	35099999	0.890292	-4.55135	ENSG00000113492 ENSG00000212082 ENSG00000250886
chr5	35100000	35199999	0.424787	-4.56183	ENSG00000113494
chr5	37900000	37999999	-0.747042	3.82387	ENSG00000248539 ENSG00000250032 ENSG00000251518 ENSG00000248533
chr5	38100000	38199999	-0.875378	5.00941	ENSG00000250003 ENSG00000248461
chr5	38200000	38299999	-0.810883	4.66328	ENSG00000248730
chr5	38300000	38399999	-0.734471	4.19344	ENSG00000249071
chr5	38400000	38499999	-0.332057	4.66481	ENSG00000248572 ENSG00000249491 ENSG00000248234 ENSG00000251257
chr5	38500000	38599999	-0.369199	6.05759	ENSG00000113594
chr5	38700000	38799999	-0.253864	4.48741	ENSG00000249911 ENSG00000249740 ENSG00000248577 ENSG00000250629
chr5	38800000	38899999	-0.157933	3.8218	ENSG00000205783 ENSG00000205785 ENSG00000145623
chr5	53700000	53799999	0.083122	4.73232	ENSG00000169271
chr5	53800000	53899999	-0.135092	5.24114	ENSG00000178996
chr5	55400000	55499999	0.149829	4.25491	ENSG00000164512 ENSG00000253032 ENSG00000243592 ENSG00000223003 ENSG00000251435
chr5	55700000	55799999	-0.561891	4.12229	ENSG00000248727
chr5	56100000	56199999	-0.146069	3.9565	ENSG00000095015 ENSG00000237705 ENSG00000238717
chr5	60500000	60599999	0.220027	3.88128	ENSG00000249279
chr5	6400000	6499999	-0.540652	4.54598	ENSG00000215218
chr5	7100000	7199999	0.42519	-4.43776
chr5	71800000	71899999	0.306494	3.73396
chr5	71900000	71999999	0.114902	5.2432	ENSG00000248371
chr5	7200000	7299999	0.476549	-4.75704	ENSG00000248775 ENSG00000247732
chr5	72000000	72099999	0.254116	5.11076	ENSG00000251613 ENSG00000226544 ENSG00000223497 ENSG00000206770
chr5	7300000	7399999	0.468664	-5.09175	ENSG00000205976 ENSG00000251250 ENSG00000251678 ENSG00000250668 ENSG00000249638 ENSG00000249865 ENSG00000223597
chr5	73100000	73199999	0.169373	4.41277	ENSG00000238913
chr5	73200000	73299999	-0.0861995	5.69745
chr5	73300000	73399999	-0.152069	4.8481	ENSG00000248474
chr5	73400000	73499999	-0.148668	4.85901	ENSG00000250336 ENSG00000241963
chr5	73500000	73599999	-0.00635402	4.93751	ENSG00000222551
chr5	73600000	73699999	0.22493	4.41903	ENSG00000248942 ENSG00000244326 ENSG00000251041 ENSG00000249343 ENSG00000250446
chr5	73700000	73799999	0.581188	3.90363	ENSG00000248673
chr5	7600000	7699999	0.33954	-5.01817
chr5	7700000	7799999	0.189778	-5.10016	ENSG00000250761
chr5	7800000	7899999	0.232325	-3.71727	ENSG00000215217 ENSG00000124275 ENSG00000124279
chr5	78200000	78299999	1.09299	-3.96821	ENSG00000214890
chr5	78300000	78399999	0.988067	-4.00152	ENSG00000132840
chr5	78400000	78499999	0.981992	-3.87045	ENSG00000145692 ENSG00000201955 ENSG00000249829
chr5	78500000	78599999	0.99053	-4.90381	ENSG00000206592 ENSG00000240551 ENSG00000250330 ENSG00000152409 ENSG00000213757
chr5	78700000	78799999	0.930441	-5.45322	ENSG00000152413
chr5	78800000	78899999	0.97235	-5.37089	ENSG00000213755 ENSG00000243160 ENSG00000207391
chr5	78900000	78999999	0.807608	-4.66271	ENSG00000164329
chr5	79000000	79099999	0.735838	-4.07681	ENSG00000164309 ENSG00000250258
chr5	79100000	79199999	0.890797	-5.40057	ENSG00000238254
chr5	79200000	79299999	1.13774	-5.76049	ENSG00000250888 ENSG00000177034
chr5	79300000	79399999	1.1178	-3.99491	ENSG00000113296 ENSG00000251050 ENSG00000249778 ENSG00000249825
chr5	80000000	80099999	0.890492	-4.33217	ENSG00000248967
chr5	80200000	80299999	0.904375	-4.83944	ENSG00000251450 ENSG00000251001
chr5	80400000	80499999	0.982185	-5.46439	ENSG00000249772
chr5	80700000	80799999	0.777999	-4.48788
chr5	80800000	80899999	0.701717	-4.62241
chr5	81300000	81399999	0.78235	-4.54723	ENSG00000251495 ENSG00000248192
chr5	81400000	81499999	0.742299	-4.61719
chr5	81500000	81599999	0.740035	-4.10388	ENSG00000251374 ENSG00000186468
chr5	81600000	81699999	0.80646	-4.50804	ENSG00000205464
chr5	81700000	81799999	0.405312	-4.05869
chr5	82400000	82499999	0.615103	-4.77012	ENSG00000243385
chr5	82500000	82599999	0.594652	-4.42801	ENSG00000251552
chr5	82600000	82699999	0.773227	-5.03222
chr5	82800000	82899999	0.636107	-3.88393	ENSG00000038427 ENSG00000249835
chr5	83000000	83099999	-0.0293162	-5.20418	ENSG00000242858 ENSG00000202157
chr5	83100000	83199999	-0.2603	-4.61206	ENSG00000250013
chr5	86100000	86199999	-0.177086	-4.0981	ENSG00000242477
chr5	86300000	86399999	-0.14838	-4.24747	ENSG00000249061 ENSG00000251951
chr5	86400000	86499999	0.14152	-4.20042
chr5	86500000	86599999	0.129934	-3.79692	ENSG00000233828 ENSG00000241243 ENSG00000207452
chr5	87000000	87099999	-0.255175	-3.72123	ENSG00000248708
chr5	87300000	87399999	0.0636471	-4.62874
chr5	87400000	87499999	0.167638	-5.04217
chr5	87500000	87599999	0.280221	-7.33455	ENSG00000164180 ENSG00000197071 ENSG00000207129
chr5	87600000	87699999	0.136385	-5.87194	ENSG00000247828 ENSG00000240083 ENSG00000206958 ENSG00000250306
chr5	87700000	87799999	0.229056	-6.32051	ENSG00000250156
chr5	87800000	87899999	0.363829	-6.47961	ENSG00000245526 ENSG00000250705
chr5	87900000	87999999	0.452087	-4.11372	ENSG00000207570 ENSG00000245864 ENSG00000250555 ENSG00000250377
chr5	88000000	88099999	0.594437	-5.82764
chr5	88100000	88199999	0.476264	-8.74254	ENSG00000081189
chr5	88200000	88299999	0.147535	-7.92009
chr5	88300000	88399999	-0.197907	-4.36946
chr5	89300000	89399999	-0.223725	-4.70064
chr5	89400000	89499999	0.225344	-6.43107
chr5	89500000	89599999	0.650094	-4.54567	ENSG00000248555
chr5	90300000	90399999	0.46736	-4.17339	ENSG00000249514
chr5	90400000	90499999	0.848546	-6.10041
chr5	90500000	90599999	0.833623	-4.91739	ENSG00000212930 ENSG00000251093 ENSG00000199643 ENSG00000234292 ENSG00000239770
chr5	90700000	90799999	0.564175	-4.30011	ENSG00000251356
chr5	90800000	90899999	0.167422	-3.95456
chr5	90900000	90999999	-0.134411	-4.09886
chr5	93300000	93399999	0.315599	-6.61313
chr5	93500000	93599999	0.579084	-6.17269
chr5	93600000	93699999	0.581771	-6.16041
chr5	93700000	93799999	0.538448	-5.06105
chr5	93800000	93899999	0.587711	-4.82796
chr5	93900000	93999999	0.647881	-5.93495	ENSG00000251544 ENSG00000254132 ENSG00000241988 ENSG00000251340 ENSG00000240623 ENSG00000240650 ENSG00000211498 ENSG00000232578
chr5	94200000	94299999	0.365942	-4.45958
chr5	94300000	94399999	0.393602	-4.46612	ENSG00000249545
chr5	98600000	98699999	-0.528255	-3.99558
chr6	100600000	100699999	0.321667	-5.26251	ENSG00000216378
chr6	100800000	100899999	0.471294	-5.17515	ENSG00000112246 ENSG00000228082
chr6	100900000	100999999	0.561041	-6.2111	ENSG00000220695
chr6	101000000	101099999	0.248068	-7.58599
chr6	101400000	101499999	-0.145758	-4.7654	ENSG00000238999
chr6	102000000	102099999	-0.399553	-4.32958
chr6	114200000	114299999	0.801442	-4.15376	ENSG00000175967 ENSG00000196591 ENSG00000226099
chr6	114300000	114399999	0.684344	-6.16811	ENSG00000216723
chr6	114400000	114499999	0.621179	-4.96248	ENSG00000216471
chr6	114500000	114599999	0.523457	-3.97936	ENSG00000212333 ENSG00000221599
chr6	114600000	114699999	0.467981	-3.73375	ENSG00000218089
chr6	114700000	114799999	0.421049	-5.31586
chr6	114800000	114899999	0.404426	-5.5985	ENSG00000232395 ENSG00000226079
chr6	114900000	114999999	0.212756	-5.02333
chr6	119000000	119099999	0.659909	-4.1869	ENSG00000225549
chr6	119100000	119199999	0.544837	-3.8543	ENSG00000111877
chr6	119300000	119399999	0.038598	-5.00163	ENSG00000253194 ENSG00000111879 ENSG00000222649 ENSG00000207982
chr6	119500000	119599999	-0.12271	-5.71882	ENSG00000111885 ENSG00000216316
chr6	119600000	119699999	-0.265679	-3.81966	ENSG00000200732
chr6	123000000	123099999	0.269471	-4.31156	ENSG00000240606
chr6	127700000	127799999	0.0519221	-4.93406	ENSG00000220522 ENSG00000220694 ENSG00000255330 ENSG00000189367
chr6	129100000	129199999	0.299946	-3.9049
chr6	129200000	129299999	0.108167	-4.66435	ENSG00000220884
chr6	129400000	129499999	-0.0893966	-5.0895	ENSG00000219642
chr6	129500000	129599999	-0.113735	-5.08744
chr6	129800000	129899999	0.418021	-4.06502	ENSG00000233351 ENSG00000226149
chr6	133000000	133099999	-0.315769	4.70026	ENSG00000112299 ENSG00000218991 ENSG00000093134 ENSG00000112303 ENSG00000234484
chr6	143000000	143099999	0.702843	-4.09808	ENSG00000233138
chr6	143800000	143899999	1.03078	-4.48339	ENSG00000241847 ENSG00000001036 ENSG00000229036 ENSG00000235740
chr6	143900000	143999999	0.901637	-4.52138
chr6	146000000	146099999	-0.5364	4.62365
chr6	146100000	146199999	-0.546481	4.82627	ENSG00000118496 ENSG00000235652
chr6	148900000	148999999	0.962582	-5.40243	ENSG00000231368
chr6	149000000	149099999	0.868907	-4.29632
chr6	149100000	149199999	0.729483	-4.14504
chr6	153000000	153099999	-0.876126	3.87984	ENSG00000120279 ENSG00000218792 ENSG00000146469
chr6	153100000	153199999	-0.907812	4.4576	ENSG00000224893
chr6	153200000	153299999	-0.770289	4.57914	ENSG00000217372 ENSG00000220745 ENSG00000112029
chr6	160100000	160199999	0.156425	4.71404	ENSG00000112096 ENSG00000220305 ENSG00000251988 ENSG00000146457 ENSG00000120437
chr6	160300000	160399999	0.236529	4.14458	ENSG00000236823 ENSG00000130368
chr6	160400000	160499999	0.270102	4.69314	ENSG00000197081
chr6	160800000	160899999	-0.422724	5.47483	ENSG00000146477 ENSG00000256731
chr6	161600000	161699999	-0.314973	6.31832	ENSG00000026652
chr6	161700000	161799999	-0.345233	6.59878
chr6	161800000	161899999	-0.648383	7.03921
chr6	161900000	161999999	-1.07436	6.99056
chr6	162000000	162099999	-1.19429	4.35994	ENSG00000221021
chr6	163200000	163299999	-1.1021	4.20355	ENSG00000239904
chr6	163300000	163399999	-1.07523	4.53676	ENSG00000217557
chr6	163500000	163599999	-1.11118	5.36202	ENSG00000225683
chr6	163600000	163699999	-1.02635	6.46502	ENSG00000239136
chr6	163700000	163799999	-0.771489	6.27438	ENSG00000217514
chr6	163900000	163999999	-0.51243	3.72809	ENSG00000112531
chr6	164000000	164099999	-0.828712	4.75766	ENSG00000228692
chr6	164100000	164199999	-0.884985	4.33902	ENSG00000235538
chr6	164200000	164299999	-0.845618	3.97887
chr6	166300000	166399999	-0.648069	4.77128	ENSG00000256391 ENSG00000223414 ENSG00000252196
chr6	168200000	168299999	-0.0238991	6.34839	ENSG00000198221
chr6	168300000	168399999	-0.303823	6.31017	ENSG00000130396 ENSG00000235994 ENSG00000229921
chr6	168800000	168899999	-1.1566	8.65278
chr6	169600000	169699999	-0.836399	8.12426	ENSG00000226445 ENSG00000186340 ENSG00000233085 ENSG00000224999
chr6	170000000	170099999	-0.462349	13.9887
chr6	170800000	170899999	-0.373426	9.64588	ENSG00000008018 ENSG00000112592 ENSG00000071994
chr6	18600000	18699999	-0.534575	5.30556
chr6	18700000	18799999	-0.85078	3.80623
chr6	18900000	18999999	-1.11896	3.85794
chr6	19500000	19599999	-0.827131	3.91465	ENSG00000226786
chr6	19700000	19799999	-0.52611	3.81061	ENSG00000237404 ENSG00000227116
chr6	19800000	19899999	-0.60265	5.64772	ENSG00000228412 ENSG00000172201
chr6	19900000	19999999	-0.716282	7.50734
chr6	23500000	23599999	-1.10169	4.01535
chr6	25000000	25099999	1.12334	-3.7894	ENSG00000220517 ENSG00000244618 ENSG00000229313 ENSG00000223623 ENSG00000230372
chr6	2600000	2699999	1.08665	-4.71797	ENSG00000164385 ENSG00000228718
chr6	2700000	2799999	1.4696	-5.0655	ENSG00000145949 ENSG00000251499 ENSG00000124535
chr6	46500000	46599999	-0.77536	6.31214	ENSG00000146233 ENSG00000228402
chr6	46600000	46699999	-0.687111	6.77132	ENSG00000153291 ENSG00000242973 ENSG00000180113 ENSG00000146070
chr6	46700000	46799999	-0.578387	5.65321	ENSG00000230062 ENSG00000236164 ENSG00000112818
chr6	51800000	51899999	-0.272313	-4.04896	ENSG00000240641
chr6	52800000	52899999	0.524249	4.37696	ENSG00000220504 ENSG00000243236 ENSG00000170899 ENSG00000252106 ENSG00000202198 ENSG00000112144
chr6	52900000	52999999	0.615869	4.64354	ENSG00000112146 ENSG00000252253 ENSG00000242865
chr6	55700000	55799999	-0.789228	3.93749
chr6	57300000	57399999	-0.32325	4.32999
chr6	6700000	6799999	-0.0107782	5.23243	ENSG00000226281 ENSG00000247225 ENSG00000224532 ENSG00000219986
chr6	6800000	6899999	-0.10632	4.61856
chr6	6900000	6999999	0.00403786	4.7756	ENSG00000223342 ENSG00000240936 ENSG00000203498
chr6	7000000	7099999	0.207337	4.65905	ENSG00000251762
chr6	7100000	7199999	0.563722	3.8228	ENSG00000124782 ENSG00000225092 ENSG00000201483
chr6	71800000	71899999	-0.481093	-4.20715	ENSG00000221345 ENSG00000218350 ENSG00000207180
chr6	73700000	73799999	0.0499908	-5.63235	ENSG00000220515
chr6	73800000	73899999	0.59399	-6.66544	ENSG00000229154 ENSG00000234025
chr6	75800000	75899999	0.627304	-4.6402	ENSG00000111799
chr6	76000000	76099999	1.09158	-6.54099	ENSG00000225793 ENSG00000203489 ENSG00000237174
chr6	76100000	76199999	1.1571	-6.7081	ENSG00000118407 ENSG00000221332 ENSG00000238156 ENSG00000217680 ENSG00000201291
chr6	76200000	76299999	1.13503	-5.75393	ENSG00000219722 ENSG00000220730
chr6	76300000	76399999	1.06663	-4.42695	ENSG00000252137 ENSG00000112701 ENSG00000217488 ENSG00000252498 ENSG00000200091
chr6	77100000	77199999	-0.484493	-4.52573	ENSG00000238697
chr6	78000000	78099999	-0.570908	-4.3058
chr6	7900000	7999999	-0.177729	4.19959	ENSG00000239264 ENSG00000259040 ENSG00000217746 ENSG00000219294
chr6	94300000	94399999	-0.00464401	-3.80309
chr6	94400000	94499999	0.194501	-4.3961
chr6	94500000	94599999	0.256219	-4.06523	ENSG00000252249 ENSG00000229600
chr6	94600000	94699999	0.249089	-4.5116
chr6	94700000	94799999	0.155711	-4.55886
chr6	94900000	94999999	-0.164106	-4.41111
chr6	97900000	97999999	0.0394968	-6.28186
chr6	98000000	98099999	0.230464	-5.00064
chr6	98100000	98199999	0.32584	-4.21989	ENSG00000224849 ENSG00000242486 ENSG00000226207
chr6	98200000	98299999	0.308493	-4.64217
chr6	98300000	98399999	0.310897	-4.61986
chr6	98500000	98599999	0.063268	-4.73972
chr6	98600000	98699999	-0.0955615	-5.72452	ENSG00000220505 ENSG00000236920
chr6	99000000	99099999	-0.0393295	-4.85602	ENSG00000235504
chr7	101400000	101499999	1.06104	3.73624
chr7	103000000	103099999	-0.287839	4.12376	ENSG00000170615 ENSG00000251852 ENSG00000252047
chr7	103100000	103199999	-0.584968	4.04525	ENSG00000234715 ENSG00000222386
chr7	105200000	105299999	1.38184	-5.02457	ENSG00000185055 ENSG00000231167
chr7	105300000	105399999	1.455	-4.37701
chr7	105400000	105499999	1.50241	-4.27725	ENSG00000226624
chr7	105700000	105799999	1.25975	-5.18837	ENSG00000008282 ENSG00000242562
chr7	105800000	105899999	0.888352	-4.18883	ENSG00000201796
chr7	110200000	110299999	-0.265661	-4.47959
chr7	112200000	112299999	0.382824	-6.60974
chr7	119900000	119999999	-0.384047	-3.96121
chr7	120000000	120099999	-0.30176	-4.05253
chr7	120100000	120199999	-0.274007	-4.41679
chr7	120200000	120299999	-0.100756	-6.08852
chr7	120300000	120399999	0.114221	-5.97782	ENSG00000252023 ENSG00000231295
chr7	120400000	120499999	0.247199	-4.00109	ENSG00000106025
chr7	121300000	121399999	0.463434	-4.69258	ENSG00000252704
chr7	121400000	121499999	0.534481	-3.92882	ENSG00000233272
chr7	121600000	121699999	0.724144	-3.9796	ENSG00000106278
chr7	122200000	122299999	0.536693	-7.04192
chr7	122300000	122399999	0.331907	-7.40222	ENSG00000225795 ENSG00000235459 ENSG00000188050 ENSG00000235631
chr7	122400000	122499999	0.0478028	-6.20148	ENSG00000227573
chr7	123200000	123299999	0.282636	-3.77243	ENSG00000146809 ENSG00000230442
chr7	123400000	123499999	0.282242	-5.11645	ENSG00000201104 ENSG00000228211 ENSG00000106302
chr7	123600000	123699999	-0.281996	-5.14754	ENSG00000241345 ENSG00000234224
chr7	124400000	124499999	-0.382005	-3.77574
chr7	124800000	124899999	-0.144813	-4.42161	ENSG00000205898 ENSG00000219445
chr7	124900000	124999999	-0.174851	-4.41366	ENSG00000213291 ENSG00000234071 ENSG00000227847
chr7	125000000	125099999	-0.147777	-4.03838	ENSG00000227869
chr7	126500000	126599999	-0.752684	-3.80005	ENSG00000224981
chr7	13300000	13399999	-0.580384	-5.12042	ENSG00000237713
chr7	133600000	133699999	-0.217641	4.42415
chr7	133700000	133799999	0.0355422	4.00644
chr7	13400000	13499999	-0.688032	-6.82817
chr7	134000000	134099999	0.383258	4.57556	ENSG00000229177 ENSG00000221513
chr7	13700000	13799999	-0.247176	-6.34585
chr7	13800000	13899999	0.0501535	-5.43055	ENSG00000224330
chr7	139500000	139599999	0.619534	5.38456
chr7	139800000	139899999	0.876253	4.69218	ENSG00000006459
chr7	14000000	14099999	-0.318209	-4.19982	ENSG00000252374
chr7	141100000	141199999	0.472968	-3.83391	ENSG00000204990
chr7	141200000	141299999	0.557317	-4.45916
chr7	141300000	141399999	0.62082	-4.28601	ENSG00000006530 ENSG00000244701 ENSG00000257093
chr7	141400000	141499999	0.53839	-4.76617	ENSG00000228775 ENSG00000214102 ENSG00000212153 ENSG00000106028 ENSG00000127362 ENSG00000127364 ENSG00000127366
chr7	141600000	141699999	-0.167823	-4.02885	ENSG00000244292 ENSG00000258083 ENSG00000258227 ENSG00000257138
chr7	141800000	141899999	-0.797963	-5.08844	ENSG00000257743
chr7	142700000	142799999	-0.35585	-4.49558	ENSG00000179468 ENSG00000239293 ENSG00000225781 ENSG00000179420
chr7	142900000	142999999	0.518643	-5.39392	ENSG00000221937 ENSG00000197448 ENSG00000231840 ENSG00000178826 ENSG00000106144 ENSG00000239419 ENSG00000240322
chr7	143600000	143699999	-0.397865	-3.85425	ENSG00000221910 ENSG00000243583 ENSG00000213215 ENSG00000237958 ENSG00000242280
chr7	143700000	143799999	-0.291555	-4.53474	ENSG00000221813 ENSG00000221836 ENSG00000221933 ENSG00000239967 ENSG00000221858
chr7	150600000	150699999	0.664748	4.05425	ENSG00000055118 ENSG00000164867
chr7	154500000	154599999	-0.924589	4.18002
chr7	154800000	154899999	-0.739882	3.77286	ENSG00000220575 ENSG00000157219 ENSG00000228806
chr7	18300000	18399999	0.167914	-4.64678	ENSG00000223030
chr7	18400000	18499999	0.398705	-6.80854	ENSG00000225000
chr7	18600000	18699999	0.0823561	-3.78289
chr7	1900000	1999999	0.408123	4.62679
chr7	2000000	2099999	0.573103	4.10451
chr7	20100000	20199999	0.516362	-7.06885	ENSG00000228598
chr7	20200000	20299999	1.00084	-8.31234	ENSG00000183742 ENSG00000233834
chr7	20300000	20399999	1.00182	-7.22758	ENSG00000226097
chr7	20600000	20699999	0.466742	-4.3276	ENSG00000179460 ENSG00000231525 ENSG00000223866
chr7	24200000	24299999	0.630949	-4.98813	ENSG00000228944
chr7	24500000	24599999	0.979428	-5.08179	ENSG00000206877
chr7	24600000	24699999	1.04005	-5.97955	ENSG00000105926
chr7	24700000	24799999	1.08846	-5.1237	ENSG00000105928
chr7	26400000	26499999	0.0463265	5.21232	ENSG00000225792 ENSG00000214870
chr7	26500000	26599999	-0.164468	5.13513	ENSG00000122548 ENSG00000233760
chr7	26600000	26699999	-0.22357	6.38339	ENSG00000222004
chr7	26700000	26799999	-0.0737943	6.56941
chr7	26800000	26899999	0.0541736	7.63674
chr7	27100000	27199999	0.702616	3.74941	ENSG00000105991 ENSG00000233429 ENSG00000105996 ENSG00000105997 ENSG00000253552 ENSG00000197576 ENSG00000254369 ENSG00000106004 ENSG00000106006 ENSG00000122592
chr7	28300000	28399999	1.19184	-4.06181	ENSG00000174495
chr7	28400000	28499999	1.20779	-3.9305
chr7	31500000	31599999	0.239689	-3.70977
chr7	31600000	31699999	0.285569	-4.06464	ENSG00000180347
chr7	31700000	31799999	0.305536	-4.10892	ENSG00000106341
chr7	31800000	31899999	0.180151	-5.96948	ENSG00000223070
chr7	31900000	31999999	0.0019193	-5.81471	ENSG00000236460
chr7	3200000	3299999	0.326506	-4.21644	ENSG00000231892
chr7	35700000	35799999	0.772582	-3.93479	ENSG00000122557 ENSG00000227544
chr7	36100000	36199999	0.503677	-6.79406	ENSG00000205745 ENSG00000228815
chr7	36200000	36299999	0.669103	-5.47535	ENSG00000122547 ENSG00000228770 ENSG00000229679
chr7	39300000	39399999	0.178952	-5.13126	ENSG00000206947
chr7	39400000	39499999	0.671662	-5.37682	ENSG00000224122
chr7	4100000	4199999	-0.838208	4.74612
chr7	4200000	4299999	-0.848045	6.47407
chr7	43200000	43299999	0.625364	-4.80678	ENSG00000252983 ENSG00000223258 ENSG00000228680
chr7	43500000	43599999	0.963551	-4.84283	ENSG00000231638
chr7	47400000	47499999	0.087804	4.08824
chr7	4800000	4899999	-0.11318	8.40655	ENSG00000242802 ENSG00000157927 ENSG00000206895 ENSG00000218823
chr7	4900000	4999999	0.137878	6.19445	ENSG00000213935 ENSG00000136297
chr7	49100000	49199999	-0.511078	-4.07724
chr7	500000	599999	0.493933	4.4731	ENSG00000234471 ENSG00000197461 ENSG00000223855 ENSG00000252986
chr7	50500000	50599999	-0.435864	6.33856	ENSG00000200815 ENSG00000132436 ENSG00000132437
chr7	55500000	55599999	0.384245	-6.40566	ENSG00000154978
chr7	56000000	56099999	-0.062196	8.81152	ENSG00000146729 ENSG00000239789 ENSG00000146733
chr7	600000	699999	0.644099	4.6297	ENSG00000188191 ENSG00000229380 ENSG00000237181
chr7	67200000	67299999	-1.00524	4.64029	ENSG00000223948
chr7	7500000	7599999	0.564003	-3.95252
chr7	7700000	7799999	0.770918	-5.9005	ENSG00000106399 ENSG00000234718 ENSG00000239411
chr7	7800000	7899999	0.784657	-4.86882
chr7	78000000	78099999	0.143974	-3.84334
chr7	78200000	78299999	0.161518	-6.28801
chr7	78300000	78399999	0.326699	-5.77628	ENSG00000243427
chr7	78400000	78499999	0.318139	-4.94827
chr7	78500000	78599999	0.112162	-4.31907	ENSG00000235751 ENSG00000251276
chr7	8100000	8199999	0.82008	-4.34405	ENSG00000227719
chr7	81700000	81799999	-0.299994	-4.16561
chr7	81800000	81899999	-0.176413	-4.37172
chr7	81900000	81999999	0.206226	-4.99328	ENSG00000221262
chr7	8200000	8299999	0.740295	-4.43531	ENSG00000003147
chr7	82500000	82599999	-0.0377191	-5.29839
chr7	82600000	82699999	0.0589618	-4.94222	ENSG00000202281
chr7	82700000	82799999	0.229958	-5.49867
chr7	82800000	82899999	0.364717	-4.4675
chr7	82900000	82999999	0.42168	-3.81636	ENSG00000235503
chr7	8300000	8399999	0.529064	-4.33899	ENSG00000244239 ENSG00000229970
chr7	83800000	83899999	0.690813	-4.66922
chr7	83900000	83999999	0.633268	-4.48105
chr7	8400000	8499999	0.159591	-4.23363
chr7	84000000	84099999	0.353996	-4.12355
chr7	86500000	86599999	-0.29756	-4.568	ENSG00000164659
chr7	86600000	86699999	-0.088739	-4.32168
chr7	91700000	91799999	0.844654	-3.71673	ENSG00000001630 ENSG00000240720 ENSG00000188693
chr7	92300000	92399999	1.19903	-4.37957	ENSG00000206763
chr7	93500000	93599999	0.0461968	-4.67098	ENSG00000105825 ENSG00000234695 ENSG00000127920 ENSG00000241247
chr7	93600000	93699999	0.0747547	-4.02034	ENSG00000105829 ENSG00000236861 ENSG00000236453
chr7	94500000	94599999	-0.507253	4.06253
chr7	94900000	94999999	-0.602438	4.33935	ENSG00000238384 ENSG00000005421 ENSG00000237160 ENSG00000228751
chr7	95000000	95099999	-0.458045	4.16608	ENSG00000105852 ENSG00000105854
chr7	95100000	95199999	-0.443985	4.32366	ENSG00000233942 ENSG00000005981 ENSG00000203505
chr7	95200000	95299999	-0.649676	3.75511	ENSG00000004799 ENSG00000231170
chr7	99600000	99699999	1.41597	-3.81696	ENSG00000106261 ENSG00000166529 ENSG00000166526 ENSG00000168090 ENSG00000166508 ENSG00000207547 ENSG00000207757 ENSG00000208036
chr8	10000000	10099999	-0.374865	6.19084
chr8	10100000	10199999	-0.419912	5.32018	ENSG00000249848
chr8	103200000	103299999	1.31456	-4.39986	ENSG00000048392 ENSG00000246263 ENSG00000253328
chr8	103700000	103799999	1.635	-4.06835	ENSG00000250684
chr8	115200000	115299999	-0.217524	-4.91631
chr8	124500000	124599999	0.49671	4.75786	ENSG00000156804 ENSG00000254113 ENSG00000242184
chr8	124600000	124699999	0.0638177	4.64917	ENSG00000251840 ENSG00000253286 ENSG00000175946
chr8	124700000	124799999	-0.122093	4.26647	ENSG00000104537
chr8	125000000	125099999	-0.543784	3.72722	ENSG00000181171 ENSG00000254249
chr8	125500000	125599999	0.0954915	3.94074	ENSG00000147687 ENSG00000253106 ENSG00000147684
chr8	125600000	125699999	0.17958	4.58545	ENSG00000170873
chr8	125700000	125799999	0.140192	6.05791
chr8	125800000	125899999	0.338354	4.90779	ENSG00000255491 ENSG00000255080
chr8	126000000	126099999	0.70975	3.84187	ENSG00000253513 ENSG00000104549 ENSG00000164961 ENSG00000253167
chr8	127700000	127799999	-0.0540409	-3.86533	ENSG00000253573
chr8	17500000	17599999	0.245846	3.86089	ENSG00000129422 ENSG00000253168
chr8	20200000	20299999	0.477738	-5.88405	ENSG00000253164
chr8	20300000	20399999	0.118465	-4.41392
chr8	21400000	21499999	-1.01095	4.14335	ENSG00000242932
chr8	21500000	21599999	-0.606912	4.50137
chr8	21600000	21699999	-0.223431	5.18942	ENSG00000168546
chr8	21700000	21799999	0.434941	5.12315	ENSG00000147443
chr8	24800000	24899999	-0.205258	4.02418	ENSG00000104725 ENSG00000253832
chr8	25400000	25499999	-0.418864	5.94624
chr8	35000000	35099999	0.0657364	-5.89665
chr8	35100000	35199999	-0.0890735	-5.27279
chr8	35200000	35299999	-0.28928	-4.22633
chr8	35300000	35399999	-0.408066	-4.45108	ENSG00000232024
chr8	35700000	35799999	-0.250603	-4.18864	ENSG00000253452
chr8	36900000	36999999	-0.8765	5.03477	ENSG00000254038 ENSG00000253650
chr8	59300000	59399999	-0.056555	-4.21116	ENSG00000215114 ENSG00000250031
chr8	59400000	59499999	0.24655	-5.66105	ENSG00000167910 ENSG00000254103 ENSG00000137575
chr8	59500000	59599999	0.356317	-4.36744	ENSG00000035681 ENSG00000242970 ENSG00000238433
chr8	59700000	59799999	0.294233	-7.92409	ENSG00000201231
chr8	59800000	59899999	0.0608101	-5.64521
chr8	59900000	59999999	-0.0485474	-4.09942	ENSG00000254048
chr8	60000000	60099999	-0.263575	-4.71219	ENSG00000167912 ENSG00000206853
chr8	68200000	68299999	0.833201	-3.8402
chr8	68300000	68399999	0.814303	-4.18709	ENSG00000245424 ENSG00000241961
chr8	68400000	68499999	0.733579	-4.73208	ENSG00000254253 ENSG00000243713 ENSG00000242965 ENSG00000244546 ENSG00000240157 ENSG00000241581 ENSG00000241065
chr8	72400000	72499999	0.507085	-3.90522	ENSG00000253379
chr8	72500000	72599999	0.490215	-4.36101
chr8	72600000	72699999	0.532713	-4.16251	ENSG00000254277 ENSG00000253287
chr8	72900000	72999999	0.31229	-5.21304	ENSG00000104321
chr8	73000000	73099999	0.0212668	-6.48603
chr8	73500000	73599999	-0.189097	-4.88863	ENSG00000253226
chr8	73600000	73699999	-0.0228394	-3.95975	ENSG00000253726
chr8	74300000	74399999	0.957492	-3.76026	ENSG00000253302
chr8	74400000	74499999	0.892788	-4.54443	ENSG00000254273
chr8	74500000	74599999	0.943627	-4.32809	ENSG00000253383 ENSG00000254105
chr8	81700000	81799999	-0.392099	4.16415	ENSG00000253516
chr8	81800000	81899999	-0.182987	4.44539	ENSG00000244833
chr8	8600000	8699999	1.13169	-4.87033	ENSG00000254367 ENSG00000147324
chr8	86300000	86399999	-0.923609	4.26019	ENSG00000164879 ENSG00000253549 ENSG00000104267
chr8	86400000	86499999	-0.932111	5.46654	ENSG00000254380
chr8	86900000	86999999	-0.989534	5.93857	ENSG00000253154
chr8	8700000	8799999	1.21064	-5.03176	ENSG00000200713
chr8	8800000	8899999	1.19393	-4.13103	ENSG00000233609 ENSG00000207244
chr8	8900000	8999999	1.18989	-4.50735	ENSG00000104626 ENSG00000252543 ENSG00000239078
chr8	90800000	90899999	0.718686	-7.50944	ENSG00000253349
chr8	91000000	91099999	0.260703	-6.23535	ENSG00000104325 ENSG00000104327
chr8	91100000	91199999	-0.0868346	-4.53516	ENSG00000239583
chr8	91200000	91299999	-0.140754	-5.04082
chr8	91300000	91399999	-0.0987128	-4.19886
chr8	92200000	92299999	0.0305426	-4.03661
chr8	92300000	92399999	-0.3187	-3.88355	ENSG00000147606
chr8	94500000	94599999	-0.317924	-3.87951
chr8	94600000	94699999	0.181033	-3.79916	ENSG00000253781
chr8	94700000	94799999	0.802148	-5.26759	ENSG00000188343 ENSG00000253854 ENSG00000183808 ENSG00000253722 ENSG00000212998 ENSG00000253848 ENSG00000164953
chr8	9800000	9899999	-0.266811	7.41359
chr8	9900000	9999999	-0.303385	7.27365	ENSG00000244409 ENSG00000221320
chr9	108600000	108699999	-0.442939	4.06615	ENSG00000228948
chr9	109600000	109699999	-0.0569361	4.27047	ENSG00000212276 ENSG00000242631
chr9	109700000	109799999	0.0303395	4.53433	ENSG00000148143 ENSG00000231562
chr9	111300000	111399999	-1.06851	8.00474	ENSG00000169253
chr9	111400000	111499999	-0.906892	8.53611	ENSG00000231678
chr9	111800000	111899999	0.644384	3.73859	ENSG00000106771 ENSG00000199331 ENSG00000207698
chr9	112100000	112199999	0.344062	6.34057	ENSG00000244202 ENSG00000070159
chr9	112200000	112299999	0.224654	6.68647	ENSG00000230494 ENSG00000213539
chr9	112400000	112499999	-0.00603903	5.6326
chr9	112600000	112699999	0.167592	4.17724
chr9	112700000	112799999	0.184856	4.42282	ENSG00000228053
chr9	112800000	112899999	0.225259	4.06468
chr9	119700000	119799999	-0.496176	-3.76392
chr9	119800000	119899999	-0.624521	-3.86499
chr9	123100000	123199999	0.316324	-4.86959	ENSG00000240783
chr9	123300000	123399999	0.885291	-3.99665
chr9	123400000	123499999	0.984299	-4.7907	ENSG00000106780 ENSG00000238181
chr9	132700000	132799999	1.20753	3.75259	ENSG00000187239
chr9	136600000	136699999	0.539175	4.99947	ENSG00000256225
chr9	136900000	136999999	0.75945	3.75892	ENSG00000169925 ENSG00000235138
chr9	137200000	137299999	0.156284	5.49691	ENSG00000186350
chr9	137300000	137399999	-0.0971795	5.82794
chr9	137600000	137699999	-0.464982	4.61685
chr9	137900000	137999999	-0.611364	7.35058	ENSG00000130558
chr9	138500000	138599999	0.111036	5.70205	ENSG00000236543 ENSG00000204007 ENSG00000148386 ENSG00000165643
chr9	138600000	138699999	0.458488	4.23625	ENSG00000107147
chr9	1800000	1899999	-0.00885284	-4.15762
chr9	1900000	1999999	0.437531	-4.44582	ENSG00000224092
chr9	2000000	2099999	0.683306	-4.46442	ENSG00000236199
chr9	20600000	20699999	0.872804	-3.77688	ENSG00000227071
chr9	20700000	20799999	0.650312	-4.6901	ENSG00000207609 ENSG00000202189
chr9	33000000	33099999	0.648294	3.99664	ENSG00000225693 ENSG00000086061 ENSG00000122692 ENSG00000222169
chr9	5800000	5899999	0.28909	5.11069	ENSG00000223621 ENSG00000238654
chr9	7100000	7199999	0.337183	-4.02964
chr9	7400000	7499999	-0.58283	-4.41705	ENSG00000230207
chr9	74100000	74199999	0.351687	-4.03734
chr9	74800000	74899999	0.148776	-4.08598	ENSG00000119125 ENSG00000235523 ENSG00000233933
chr9	74900000	74999999	0.35018	-4.19646	ENSG00000252428 ENSG00000225434 ENSG00000107372
chr9	75200000	75299999	0.175412	-3.99455	ENSG00000236862
chr9	76500000	76599999	-0.0591081	-4.49089
chr9	76600000	76699999	-0.0643728	-4.5665
chr9	76700000	76799999	-0.0528385	-5.03888
chr9	76800000	76899999	-0.150821	-4.9664
chr9	76900000	76999999	-0.3379	-4.47465	ENSG00000227809
chr9	77000000	77099999	-0.465262	-4.8766
chr9	81100000	81199999	0.125754	-3.92896
chr9	81200000	81299999	-0.10275	-3.90614
chr9	82100000	82199999	-0.840523	4.44882	ENSG00000233086
chr9	82200000	82299999	-0.748484	3.98881	ENSG00000106829
chr9	82300000	82399999	-0.927023	4.85285	ENSG00000240979
chr9	82400000	82499999	-0.946282	4.46838	ENSG00000238002 ENSG00000232494
chr9	82500000	82599999	-1.03561	3.82081
chr9	84300000	84399999	-0.30664	-5.53917	ENSG00000233926 ENSG00000207206
chr9	86800000	86899999	-0.572882	10.5603	ENSG00000252940 ENSG00000233262
chr9	89300000	89399999	-0.723611	4.8702
chr9	92200000	92299999	0.6075	3.73253	ENSG00000130222
chr9	94000000	94099999	-0.29126	3.77294	ENSG00000148090
chr9	94100000	94199999	-0.194909	4.41111	ENSG00000165030 ENSG00000233081
chr9	94500000	94599999	0.1004	4.88603
chr9	97700000	97799999	0.366235	3.73302
chr9	98800000	98899999	0.43676	3.75161	ENSG00000237212 ENSG00000201938

## Sheet: MOUSE DIVERGENT 100KB REGIONS
Chr	Start	End	Mean Normalised Chromatin Structure Value	SAM divergence score	Genes
chr1	10200000	10299999	-0.0128924	-3.8402
chr1	10300000	10399999	-0.32682	-4.18709
chr1	10400000	10499999	-0.574084	-4.73208
chr1	107400000	107499999	-0.502276	-4.45685	ENSMUSG00000056536 ENSMUSG00000076999
chr1	107500000	107599999	-0.352318	-3.76418
chr1	107600000	107699999	0.0740499	-3.80932	ENSMUSG00000026319 ENSMUSG00000067015
chr1	107700000	107799999	0.24479	-3.93764	ENSMUSG00000026321
chr1	135900000	135999999	1.51771	4.72954	ENSMUSG00000041559 ENSMUSG00000020423
chr1	142600000	142699999	-0.920775	-4.07068
chr1	142800000	142899999	-0.956717	-5.2206
chr1	142900000	142999999	-0.918302	-4.91295	ENSMUSG00000093252
chr1	143000000	143099999	-1.02275	-4.35243
chr1	14400000	14499999	-0.558982	-3.90522
chr1	14500000	14599999	-0.601118	-4.36101
chr1	145000000	145099999	-1.22405	-4.03042
chr1	145900000	145999999	-0.893559	-4.09989
chr1	14600000	14699999	-0.501441	-4.16251
chr1	14800000	14899999	-0.68406	-5.21304	ENSMUSG00000081201 ENSMUSG00000082193 ENSMUSG00000032769
chr1	14900000	14999999	-0.994865	-6.48603
chr1	15300000	15399999	-1.0596	-4.88863
chr1	153100000	153199999	0.763813	4.02379	ENSMUSG00000088498 ENSMUSG00000089221 ENSMUSG00000063886
chr1	153300000	153399999	0.965683	4.17491	ENSMUSG00000026484
chr1	153500000	153599999	0.978859	3.79547
chr1	15400000	15499999	-0.94479	-3.95975
chr1	155500000	155599999	1.36748	3.92622	ENSMUSG00000042671 ENSMUSG00000026475
chr1	158300000	158399999	0.823497	6.025	ENSMUSG00000026601 ENSMUSG00000026600
chr1	158400000	158499999	1.15301	5.33593	ENSMUSG00000057808
chr1	158500000	158599999	1.14791	4.83873	ENSMUSG00000026596 ENSMUSG00000060519
chr1	158600000	158699999	1.1828	4.8061	ENSMUSG00000033557
chr1	158700000	158799999	1.15447	3.90969	ENSMUSG00000046057 ENSMUSG00000033544
chr1	158800000	158899999	1.18579	4.60578	ENSMUSG00000026594
chr1	16200000	16299999	0.104815	-3.76026	ENSMUSG00000089982
chr1	16300000	16399999	-0.107537	-4.54443
chr1	16400000	16499999	0.156342	-4.32809
chr1	167200000	167299999	0.489011	-4.89745	ENSMUSG00000040836
chr1	167300000	167399999	0.404792	-3.87413	ENSMUSG00000026571 ENSMUSG00000089299
chr1	167400000	167499999	0.644139	-4.55594	ENSMUSG00000026568 ENSMUSG00000026567 ENSMUSG00000087886
chr1	168900000	168999999	0.0929636	4.41965	ENSMUSG00000086622 ENSMUSG00000060568
chr1	169500000	169599999	0.329263	4.32446	ENSMUSG00000015843
chr1	173500000	173599999	-0.316383	-4.83442	ENSMUSG00000004709 ENSMUSG00000004707 ENSMUSG00000038179
chr1	173600000	173699999	-0.279407	-4.78446	ENSMUSG00000015355 ENSMUSG00000059058 ENSMUSG00000088291 ENSMUSG00000065390
chr1	177200000	177299999	-1.12595	-5.2435
chr1	177400000	177499999	-1.12401	-5.77649
chr1	179700000	179799999	0.0663711	-3.75259	ENSMUSG00000015961 ENSMUSG00000089657
chr1	181100000	181199999	0.251458	4.15292
chr1	181200000	181299999	0.421628	3.82506
chr1	182300000	182399999	1.47542	4.05859	ENSMUSG00000038855 ENSMUSG00000053963
chr1	184400000	184499999	1.22239	4.7796	ENSMUSG00000026509 ENSMUSG00000087419
chr1	184600000	184699999	0.644918	3.861	ENSMUSG00000043429
chr1	186500000	186599999	0.459669	4.51174	ENSMUSG00000092578 ENSMUSG00000039377
chr1	186600000	186699999	0.756107	5.02292	ENSMUSG00000026621 ENSMUSG00000073481 ENSMUSG00000088559 ENSMUSG00000088562
chr1	188500000	188599999	0.0585077	4.6585	ENSMUSG00000089045 ENSMUSG00000001305 ENSMUSG00000090488
chr1	188600000	188699999	-0.346623	3.8533
chr1	188800000	188899999	-0.519888	4.19581	ENSMUSG00000089831
chr1	190100000	190199999	-1.10704	-3.77791
chr1	190200000	190299999	-1.20914	-6.17223
chr1	190300000	190399999	-0.980594	-4.99771	ENSMUSG00000077884
chr1	193600000	193699999	1.04243	3.87137	ENSMUSG00000026622
chr1	20400000	20499999	-1.0032	-4.04896	ENSMUSG00000090142 ENSMUSG00000070175
chr1	21400000	21499999	-0.583675	-6.66544
chr1	21500000	21599999	-0.921628	-5.63235	ENSMUSG00000082935
chr1	23500000	23599999	-1.27832	-4.20715
chr1	33600000	33699999	0.738187	4.32999
chr1	35900000	35999999	0.92477	4.83129
chr1	36000000	36099999	1.21093	5.55475
chr1	36800000	36899999	1.23466	3.81169	ENSMUSG00000026117
chr1	36900000	36999999	1.28954	4.36969	ENSMUSG00000026116
chr1	37100000	37199999	0.908411	3.95136	ENSMUSG00000050122
chr1	38900000	38999999	0.248782	4.42355	ENSMUSG00000026080
chr1	43800000	43899999	0.420941	4.63041	ENSMUSG00000057363 ENSMUSG00000090243
chr1	44700000	44799999	-0.907267	-6.67887	ENSMUSG00000089877
chr1	44800000	44899999	-0.689982	-5.32005
chr1	47000000	47099999	-0.418521	-4.20014
chr1	47200000	47299999	-0.837916	-6.9786
chr1	47300000	47399999	-0.892241	-4.62489
chr1	50800000	50899999	-1.04284	-4.08123
chr1	52200000	52299999	0.477929	-3.79502	ENSMUSG00000026103
chr1	52300000	52399999	0.239731	-5.24919
chr1	52500000	52599999	-0.0676332	-4.86394	ENSMUSG00000065192 ENSMUSG00000002881
chr1	57400000	57499999	0.203712	-4.1291	ENSMUSG00000084958 ENSMUSG00000038323 ENSMUSG00000048495 ENSMUSG00000025971 ENSMUSG00000077776
chr1	57500000	57599999	0.0352471	-5.66383	ENSMUSG00000088353
chr1	57600000	57699999	-0.0850031	-6.53023
chr1	57800000	57899999	0.135471	-5.66628
chr1	57900000	57999999	0.307228	-4.42536	ENSMUSG00000038305 ENSMUSG00000089176 ENSMUSG00000091283
chr1	58000000	58099999	0.505021	-3.75359	ENSMUSG00000054770 ENSMUSG00000026039
chr1	64500000	64599999	0.82383	-4.02003
chr1	65300000	65399999	-0.109428	-3.98499	ENSMUSG00000025946
chr1	65400000	65499999	-0.534203	-4.43922
chr1	65500000	65599999	-0.782736	-4.50635	ENSMUSG00000082565 ENSMUSG00000082774
chr1	65800000	65899999	-0.86429	-4.27531
chr1	65900000	65999999	-0.931077	-5.64554	ENSMUSG00000025945
chr1	73900000	73999999	1.16326	5.81364
chr1	74000000	74099999	1.16189	4.61939
chr1	79100000	79199999	-1.1905	-4.94649
chr1	79300000	79399999	-0.658853	-4.86938
chr1	79400000	79499999	-0.599832	-4.91339	ENSMUSG00000050711
chr1	79500000	79599999	-0.441787	-5.60441	ENSMUSG00000077782
chr1	79600000	79699999	-0.0549805	-5.28975	ENSMUSG00000054702
chr1	89300000	89399999	1.20241	3.79659	ENSMUSG00000089613 ENSMUSG00000026258
chr1	90200000	90299999	0.650804	5.91912	ENSMUSG00000036251 ENSMUSG00000085420
chr1	90400000	90499999	1.10988	4.96103	ENSMUSG00000062310
chr1	91100000	91199999	0.781599	5.05488
chr1	91200000	91299999	0.822435	5.45482
chr1	92000000	92099999	0.891594	5.88825
chr1	92100000	92199999	0.852781	5.7656	ENSMUSG00000044337
chr1	92200000	92299999	0.722988	5.36328
chr1	92300000	92399999	0.812832	5.05897
chr1	93600000	93699999	0.712901	6.25976
chr1	93900000	93999999	0.585852	4.94024
chr1	94000000	94099999	0.918231	5.85509
chr1	94700000	94799999	0.936891	6.31427	ENSMUSG00000034220 ENSMUSG00000065470 ENSMUSG00000034212
chr1	94800000	94899999	1.09079	4.78891	ENSMUSG00000047067 ENSMUSG00000091828 ENSMUSG00000026269 ENSMUSG00000026270 ENSMUSG00000026271
chr1	95000000	95099999	1.1728	4.77252	ENSMUSG00000090847 ENSMUSG00000026272 ENSMUSG00000034159
chr1	95100000	95199999	1.57623	7.69659	ENSMUSG00000084989 ENSMUSG00000047793 ENSMUSG00000026273
chr1	96300000	96399999	-1.04267	-3.99558
chr1	99700000	99799999	-0.602475	-3.87456
chr10	101800000	101899999	-0.816799	-3.9114
chr10	103000000	103099999	-0.782588	-4.85578
chr10	106600000	106699999	-0.822848	-4.21114
chr10	106800000	106899999	-0.968188	-5.15837
chr10	106900000	106999999	-0.933241	-4.26155	ENSMUSG00000000435 ENSMUSG00000035923
chr10	108200000	108299999	-0.959885	-6.17715
chr10	108300000	108399999	-0.950619	-7.31709
chr10	108400000	108499999	-1.0548	-8.49868
chr10	108500000	108599999	-1.19088	-8.71722	ENSMUSG00000088554
chr10	108600000	108699999	-1.07106	-7.13429
chr10	108700000	108799999	-1.05949	-6.19226
chr10	108800000	108899999	-1.02373	-4.5564	ENSMUSG00000065802
chr10	10900000	10999999	0.310539	4.82627	ENSMUSG00000090112 ENSMUSG00000090070 ENSMUSG00000085480
chr10	109700000	109799999	-1.18439	-4.10573
chr10	109800000	109899999	-0.992978	-4.29462
chr10	11000000	11099999	0.312309	4.62365	ENSMUSG00000047648 ENSMUSG00000087802
chr10	114000000	114099999	-1.2109	-4.90136
chr10	114100000	114199999	-1.05926	-3.81162
chr10	114200000	114299999	-0.964811	-4.11086	ENSMUSG00000089934 ENSMUSG00000084865
chr10	114300000	114399999	-1.08532	-3.72955	ENSMUSG00000084501
chr10	124700000	124799999	-1.11658	-4.55976	ENSMUSG00000020102
chr10	124800000	124899999	-1.03409	-5.77904
chr10	124900000	124999999	-0.860343	-5.32276
chr10	125100000	125199999	-0.791455	-4.93922
chr10	13000000	13099999	-0.218184	-4.52138
chr10	13200000	13299999	0.0811148	-4.48339	ENSMUSG00000019810 ENSMUSG00000019809 ENSMUSG00000019808
chr10	13800000	13899999	-0.356615	-4.09808
chr10	23500000	23599999	0.42329	4.70026	ENSMUSG00000061983 ENSMUSG00000070063 ENSMUSG00000080486 ENSMUSG00000077440 ENSMUSG00000037455 ENSMUSG00000020010
chr10	26600000	26699999	-0.391335	-4.06502
chr10	27000000	27099999	-0.945171	-5.08744
chr10	27100000	27199999	-0.96603	-5.0895	ENSMUSG00000089050
chr10	27200000	27299999	-0.918929	-4.66435
chr10	27300000	27399999	-0.741353	-3.9049
chr10	28900000	28999999	-0.657887	-4.93406	ENSMUSG00000004360
chr10	35800000	35899999	-0.886558	-5.02333
chr10	35900000	35999999	-0.968138	-5.5985
chr10	36100000	36199999	-0.988425	-5.31586
chr10	36200000	36299999	-0.614715	-3.73375
chr10	36300000	36399999	-0.747249	-3.97936
chr10	36400000	36499999	-0.824153	-4.96248	ENSMUSG00000088423
chr10	36500000	36599999	-0.729968	-6.16811
chr10	36700000	36799999	-0.201121	-4.15376	ENSMUSG00000019777
chr10	4500000	4599999	-0.161466	4.57914	ENSMUSG00000019774 ENSMUSG00000019773
chr10	4600000	4699999	-0.236593	4.4576
chr10	4700000	4799999	-0.268574	3.87984	ENSMUSG00000019772 ENSMUSG00000046916
chr10	49300000	49399999	-1.0921	-4.32958
chr10	50100000	50199999	-1.02962	-4.7654
chr10	50400000	50499999	-0.96622	-7.58599
chr10	50500000	50599999	-0.593722	-6.2111	ENSMUSG00000084635
chr10	50600000	50699999	-0.517253	-5.17515	ENSMUSG00000019913
chr10	50900000	50999999	-0.759115	-5.26251	ENSMUSG00000084449
chr10	53100000	53199999	-0.0621802	-4.1869	ENSMUSG00000056219
chr10	53200000	53299999	-0.115642	-3.8543
chr10	53400000	53499999	-0.772937	-5.00163	ENSMUSG00000019856
chr10	53600000	53699999	-1.01611	-5.71882
chr10	53700000	53799999	-1.06648	-3.81966	ENSMUSG00000003746 ENSMUSG00000084765
chr10	57400000	57499999	-0.622146	-4.31156	ENSMUSG00000019876
chr10	60300000	60399999	1.05731	5.95322	ENSMUSG00000037247
chr10	60400000	60499999	1.24681	6.49476	ENSMUSG00000080526
chr10	60500000	60599999	1.40524	5.37636	ENSMUSG00000020098 ENSMUSG00000020097
chr10	61700000	61799999	0.878073	-4.13712	ENSMUSG00000020081 ENSMUSG00000037012
chr10	66700000	66799999	1.02514	5.44185	ENSMUSG00000075000
chr10	66800000	66899999	0.608833	5.24591
chr10	66900000	66999999	0.338461	4.00625
chr10	67300000	67399999	0.577151	4.1352	ENSMUSG00000037855
chr10	67400000	67499999	0.867916	5.17557	ENSMUSG00000037846 ENSMUSG00000086838
chr10	69300000	69399999	0.85778	4.42039
chr10	69600000	69699999	1.04383	5.53127	ENSMUSG00000048701 ENSMUSG00000019933
chr10	69900000	69999999	0.592592	6.90716	ENSMUSG00000043259 ENSMUSG00000087774
chr10	70000000	70099999	0.304148	5.38294	ENSMUSG00000037747
chr10	70100000	70199999	0.221013	4.15947
chr10	70300000	70399999	0.168577	4.32656	ENSMUSG00000047692 ENSMUSG00000065292
chr10	70700000	70799999	0.828477	4.9637	ENSMUSG00000019927
chr10	74800000	74899999	0.982201	-4.46569	ENSMUSG00000033416 ENSMUSG00000033427
chr10	76300000	76399999	1.3747	4.51626
chr10	8100000	8199999	-0.216693	-4.14504
chr10	8200000	8299999	0.00464502	-4.29632
chr10	8300000	8399999	-0.0779772	-5.40243	ENSMUSG00000077582
chr10	83500000	83599999	0.380078	3.95653
chr10	83600000	83699999	0.424653	4.1813
chr10	83700000	83799999	0.60773	4.60054
chr10	83800000	83899999	0.989653	5.53761	ENSMUSG00000020032
chr10	83900000	83999999	1.18528	6.73264	ENSMUSG00000020033 ENSMUSG00000046841
chr10	84000000	84099999	1.25847	5.85101	ENSMUSG00000085671 ENSMUSG00000020034 ENSMUSG00000089096 ENSMUSG00000090905
chr10	84100000	84199999	1.33521	6.3959	ENSMUSG00000034453
chr10	84200000	84299999	1.31461	4.78431	ENSMUSG00000020037 ENSMUSG00000063986 ENSMUSG00000089451
chr10	84300000	84399999	1.41349	4.65369
chr10	94500000	94599999	1.2263	4.5352
chr10	99200000	99299999	-0.926448	-4.19908	ENSMUSG00000046934
chr11	10100000	10199999	-1.07015	-4.07724	ENSMUSG00000082312
chr11	113000000	113099999	0.532837	3.7862	ENSMUSG00000085421
chr11	114300000	114399999	0.72193	3.85477
chr11	114500000	114599999	1.11815	4.24841	ENSMUSG00000083769 ENSMUSG00000057322 ENSMUSG00000034714
chr11	114600000	114699999	1.15726	3.78443	ENSMUSG00000034706 ENSMUSG00000010021 ENSMUSG00000000202 ENSMUSG00000034677
chr11	11700000	11799999	1.00971	6.33856	ENSMUSG00000020182 ENSMUSG00000086391
chr11	118400000	118499999	0.853372	4.41856
chr11	118500000	118599999	0.607553	4.50921
chr11	118600000	118699999	0.628746	4.15877	ENSMUSG00000085059
chr11	119500000	119599999	1.63076	5.68654	ENSMUSG00000083870
chr11	119600000	119699999	1.50668	5.15076	ENSMUSG00000088670 ENSMUSG00000085081
chr11	16900000	16999999	-0.418493	-4.68981	ENSMUSG00000020120 ENSMUSG00000083752 ENSMUSG00000044629 ENSMUSG00000082099
chr11	17000000	17099999	-0.547118	-5.28126	ENSMUSG00000033953
chr11	21100000	21199999	0.685821	-3.94057	ENSMUSG00000084259 ENSMUSG00000082898 ENSMUSG00000020128 ENSMUSG00000089155 ENSMUSG00000081868 ENSMUSG00000084048
chr11	21200000	21299999	0.426384	-5.829	ENSMUSG00000001891 ENSMUSG00000089555 ENSMUSG00000087253
chr11	21400000	21499999	-0.203781	-7.26489	ENSMUSG00000078962 ENSMUSG00000020321 ENSMUSG00000093168
chr11	21500000	21599999	-0.433822	-6.99524	ENSMUSG00000083761
chr11	21900000	21999999	-0.120729	-5.61885
chr11	25600000	25699999	-1.05088	-4.56626
chr11	26300000	26399999	-0.525517	-3.90052	ENSMUSG00000004018 ENSMUSG00000081811
chr11	26500000	26599999	-0.919669	-5.99813
chr11	26600000	26699999	-0.841584	-4.24345	ENSMUSG00000082038 ENSMUSG00000069939
chr11	29000000	29099999	0.10832	-3.85228	ENSMUSG00000020464 ENSMUSG00000086725 ENSMUSG00000020463
chr11	29100000	29199999	0.348635	-4.54334	ENSMUSG00000020462
chr11	31300000	31399999	-0.42964	-4.56441
chr11	31900000	31999999	0.842432	4.81127	ENSMUSG00000020297 ENSMUSG00000086386
chr11	33900000	33999999	-0.449519	-4.0106	ENSMUSG00000085684 ENSMUSG00000002699
chr11	34800000	34899999	0.286659	4.02458
chr11	34900000	34999999	0.479791	4.81787
chr11	35000000	35099999	0.489343	5.41673	ENSMUSG00000088125
chr11	35100000	35199999	0.688296	5.54293	ENSMUSG00000082309 ENSMUSG00000086311
chr11	35200000	35299999	0.769038	4.45818
chr11	35300000	35399999	0.847073	4.44908
chr11	36400000	36499999	-1.03592	-4.7156
chr11	36500000	36599999	-0.953222	-4.41596	ENSMUSG00000065173
chr11	36600000	36699999	-1.0935	-4.96396
chr11	36700000	36799999	-0.878109	-4.36673
chr11	36800000	36899999	-0.906417	-3.8725
chr11	46600000	46699999	-0.799382	-4.5992	ENSMUSG00000055546 ENSMUSG00000082818
chr11	46700000	46799999	-0.958297	-5.1028
chr11	46800000	46899999	-0.898565	-4.90867
chr11	46900000	46999999	-0.905813	-4.96005
chr11	54000000	54099999	0.835094	3.83946	ENSMUSG00000086209 ENSMUSG00000060068 ENSMUSG00000018916 ENSMUSG00000085585 ENSMUSG00000018914
chr11	54100000	54199999	0.732669	4.78859	ENSMUSG00000020333 ENSMUSG00000085888
chr11	54400000	54499999	1.03348	5.08896	ENSMUSG00000037533
chr11	54600000	54699999	1.56046	8.17652	ENSMUSG00000086789 ENSMUSG00000020268 ENSMUSG00000088231 ENSMUSG00000020267
chr11	54900000	54999999	1.3331	3.93961	ENSMUSG00000000594 ENSMUSG00000044751 ENSMUSG00000080738 ENSMUSG00000049491 ENSMUSG00000085531 ENSMUSG00000020264
chr11	57400000	57499999	1.30765	3.92223	ENSMUSG00000085719 ENSMUSG00000086933
chr11	59000000	59099999	1.27024	6.00234	ENSMUSG00000020444 ENSMUSG00000085882 ENSMUSG00000036860 ENSMUSG00000072898 ENSMUSG00000020441 ENSMUSG00000048076 ENSMUSG00000009900
chr11	59200000	59299999	1.3455	8.3471	ENSMUSG00000009894 ENSMUSG00000036819 ENSMUSG00000054519 ENSMUSG00000084145 ENSMUSG00000083234
chr11	62100000	62199999	1.50817	4.92766	ENSMUSG00000042298 ENSMUSG00000081340 ENSMUSG00000081944
chr11	62200000	62299999	1.39095	3.97018	ENSMUSG00000018501
chr11	62700000	62799999	1.0687	4.79033	ENSMUSG00000014177 ENSMUSG00000086677 ENSMUSG00000087039 ENSMUSG00000042200
chr11	62900000	62999999	0.611277	3.85649	ENSMUSG00000018217 ENSMUSG00000085532
chr11	63000000	63099999	0.278022	4.43145	ENSMUSG00000083052
chr11	63100000	63199999	0.0870325	5.26232	ENSMUSG00000081600
chr11	66600000	66699999	0.225289	3.98222
chr11	66700000	66799999	0.617224	4.20188	ENSMUSG00000072834 ENSMUSG00000048070 ENSMUSG00000085683
chr11	66800000	66899999	0.86562	5.10332	ENSMUSG00000085926 ENSMUSG00000050270 ENSMUSG00000020910 ENSMUSG00000069844
chr11	66900000	66999999	0.607888	4.24469	ENSMUSG00000020908 ENSMUSG00000087410 ENSMUSG00000033196
chr11	67600000	67699999	0.53117	5.55341	ENSMUSG00000033044
chr11	67700000	67799999	0.773879	5.9042	ENSMUSG00000020905 ENSMUSG00000055134 ENSMUSG00000020904
chr11	67800000	67899999	0.873007	5.86372	ENSMUSG00000082266 ENSMUSG00000089599
chr11	67900000	67999999	0.994376	5.20905	ENSMUSG00000083924
chr11	68000000	68099999	1.14056	4.97827	ENSMUSG00000087242 ENSMUSG00000092434 ENSMUSG00000084993
chr11	72000000	72099999	1.10157	3.77456	ENSMUSG00000020803 ENSMUSG00000020801 ENSMUSG00000053574 ENSMUSG00000020805 ENSMUSG00000086951 ENSMUSG00000084599
chr11	73800000	73899999	-0.936998	-4.77524	ENSMUSG00000049041 ENSMUSG00000047444 ENSMUSG00000085313 ENSMUSG00000043692 ENSMUSG00000069476 ENSMUSG00000081932
chr11	75600000	75699999	1.42427	9.52049	ENSMUSG00000087059 ENSMUSG00000020847 ENSMUSG00000087322
chr11	78900000	78999999	1.39571	4.98269
chr11	79000000	79099999	1.38854	4.87301	ENSMUSG00000081000 ENSMUSG00000017677
chr11	8400000	8499999	1.09631	4.08824
chr11	84600000	84699999	1.40685	4.68364	ENSMUSG00000018405 ENSMUSG00000034449 ENSMUSG00000086799 ENSMUSG00000020530 ENSMUSG00000045140
chr11	85400000	85499999	1.05272	3.84215
chr11	86100000	86199999	1.47162	4.39101	ENSMUSG00000034297 ENSMUSG00000088309 ENSMUSG00000088230
chr11	86700000	86799999	1.35171	4.02396	ENSMUSG00000018427
chr11	86800000	86899999	1.42352	5.15375	ENSMUSG00000088816 ENSMUSG00000061666 ENSMUSG00000085991 ENSMUSG00000020495 ENSMUSG00000082507
chr11	87000000	87099999	1.49162	7.037
chr11	87100000	87199999	1.49631	4.41399	ENSMUSG00000046442 ENSMUSG00000080976 ENSMUSG00000088001 ENSMUSG00000092772
chr11	89000000	89099999	0.961333	4.85153
chr11	89100000	89199999	0.58358	5.07529	ENSMUSG00000048616 ENSMUSG00000085798
chr11	89200000	89299999	0.12505	4.56265	ENSMUSG00000047490
chr11	89300000	89399999	-0.259991	3.79752
chr12	100000000	100099999	0.762772	4.06272	ENSMUSG00000051166 ENSMUSG00000021012
chr12	101500000	101599999	1.53059	4.83921
chr12	101600000	101699999	1.39895	4.07584
chr12	103600000	103699999	1.49101	4.85972	ENSMUSG00000021190
chr12	103700000	103799999	1.46641	4.74656	ENSMUSG00000021192 ENSMUSG00000021194
chr12	105700000	105799999	0.606949	5.62495	ENSMUSG00000021095 ENSMUSG00000056606
chr12	105800000	105899999	0.617568	5.9851
chr12	105900000	105999999	1.04892	5.76587	ENSMUSG00000041415
chr12	106000000	106099999	1.07329	4.60968	ENSMUSG00000021097
chr12	106100000	106199999	1.08235	5.53402	ENSMUSG00000021101
chr12	106200000	106299999	1.20668	4.55055	ENSMUSG00000054150 ENSMUSG00000088789 ENSMUSG00000021102
chr12	107000000	107099999	1.20636	4.4115	ENSMUSG00000021111
chr12	107300000	107399999	0.505395	4.8549
chr12	107400000	107499999	0.181271	4.35092	ENSMUSG00000077640
chr12	111100000	111199999	0.253023	4.36857
chr12	111200000	111299999	0.180446	4.07752
chr12	111300000	111399999	0.321357	4.20655
chr12	111400000	111499999	0.678591	4.55804
chr12	11300000	11399999	-0.166129	-4.15286	ENSMUSG00000054459
chr12	113400000	113499999	0.666451	4.09372	ENSMUSG00000021294
chr12	11400000	11499999	-0.510638	-5.13595	ENSMUSG00000087092 ENSMUSG00000086022
chr12	11500000	11599999	-0.865931	-7.62179
chr12	11600000	11699999	-1.0628	-7.10576	ENSMUSG00000088565
chr12	11700000	11799999	-1.13587	-5.48584
chr12	120200000	120299999	-0.617302	-4.3276
chr12	120500000	120599999	-0.786763	-7.22758	ENSMUSG00000021908
chr12	120600000	120699999	-0.821691	-8.31234	ENSMUSG00000041886
chr12	120700000	120799999	-0.935723	-7.06885
chr12	12200000	12299999	0.203119	4.25214
chr12	25700000	25799999	0.959016	4.83109	ENSMUSG00000036333 ENSMUSG00000020644
chr12	28100000	28199999	-0.169099	4.01868
chr12	29500000	29599999	0.435682	4.50926
chr12	29600000	29699999	0.165828	4.41545
chr12	29700000	29799999	0.092851	4.51157	ENSMUSG00000089583
chr12	33500000	33599999	0.0240173	-4.18883	ENSMUSG00000020572 ENSMUSG00000059937
chr12	33600000	33699999	0.392183	-5.18837	ENSMUSG00000086543 ENSMUSG00000020570 ENSMUSG00000089136
chr12	33800000	33899999	0.636242	-4.27725	ENSMUSG00000052125 ENSMUSG00000084979 ENSMUSG00000079143
chr12	33900000	33999999	0.487517	-4.37701
chr12	34000000	34099999	0.492394	-5.02457	ENSMUSG00000085664 ENSMUSG00000020562
chr12	35100000	35199999	-0.563096	-3.78289
chr12	35200000	35299999	-0.868636	-6.80854
chr12	35300000	35399999	-0.673039	-4.64678
chr12	39400000	39499999	-1.00062	-4.19982
chr12	39700000	39799999	-0.901786	-5.43055
chr12	39800000	39899999	-1.06613	-6.34585
chr12	40000000	40099999	-1.24811	-6.82817
chr12	40100000	40199999	-1.06427	-5.12042	ENSMUSG00000077700
chr12	43100000	43199999	-0.859081	-4.47959
chr12	52800000	52899999	1.2427	3.93235	ENSMUSG00000020955 ENSMUSG00000089346 ENSMUSG00000035247
chr12	53100000	53199999	1.05981	4.5538	ENSMUSG00000035148
chr12	53300000	53399999	0.581531	6.10274
chr12	53400000	53499999	0.82744	7.70479
chr12	53500000	53599999	0.811497	7.19349
chr12	53600000	53699999	0.875609	5.94259	ENSMUSG00000035133
chr12	53700000	53799999	0.538832	5.61608	ENSMUSG00000064663 ENSMUSG00000064489
chr12	53800000	53899999	0.417581	3.86394
chr12	55100000	55199999	0.413245	3.82151
chr12	55200000	55299999	0.628969	4.18294	ENSMUSG00000035105
chr12	55400000	55499999	0.579103	3.99229
chr12	55500000	55599999	0.843302	4.09519	ENSMUSG00000071329
chr12	55600000	55699999	1.20497	3.91128
chr12	59000000	59099999	-1.06219	-4.86213
chr12	59100000	59199999	-1.14389	-5.71977
chr12	59300000	59399999	-1.19737	-5.56123	ENSMUSG00000035431 ENSMUSG00000045930
chr12	59400000	59499999	-0.979612	-4.05498
chr12	69100000	69199999	-1.05111	-3.92374
chr12	71100000	71199999	0.913274	-4.54531	ENSMUSG00000021068
chr12	71200000	71299999	0.635033	-4.01762	ENSMUSG00000090121
chr12	71900000	71999999	1.22388	4.04441	ENSMUSG00000048285
chr12	73100000	73199999	0.839457	3.98026	ENSMUSG00000043398 ENSMUSG00000019718 ENSMUSG00000005078
chr12	73300000	73399999	0.238773	3.74445
chr12	73400000	73499999	0.311026	3.94594	ENSMUSG00000021087
chr12	74900000	74999999	0.502945	-4.33095
chr12	75100000	75199999	0.0370697	-3.96928
chr12	75200000	75299999	-0.459635	-3.96418
chr12	89600000	89699999	-0.76366	-6.31189	ENSMUSG00000021044
chr12	89700000	89799999	-1.07176	-7.02268
chr12	89800000	89899999	-0.96082	-4.29138	ENSMUSG00000092733
chr12	9000000	9099999	1.10897	4.5052	ENSMUSG00000066643 ENSMUSG00000066637
chr12	9100000	9199999	0.696963	4.00901
chr12	92600000	92699999	0.217977	3.93799
chr12	99500000	99599999	-0.284656	3.9676	ENSMUSG00000021886
chr12	99600000	99699999	-0.335267	3.96319
chr12	99700000	99799999	0.038721	4.912	ENSMUSG00000033854
chr12	99800000	99899999	0.361447	4.37558	ENSMUSG00000089351 ENSMUSG00000021007
chr12	99900000	99999999	0.786381	4.9492	ENSMUSG00000021009
chr13	108700000	108799999	1.04006	3.88128
chr13	112500000	112599999	0.783053	3.9565	ENSMUSG00000084217 ENSMUSG00000086480 ENSMUSG00000021754
chr13	112900000	112999999	0.548098	4.12229
chr13	113100000	113199999	1.19785	4.25491	ENSMUSG00000049985
chr13	114300000	114399999	1.30609	5.24114	ENSMUSG00000042364
chr13	114400000	114499999	1.20088	4.73232	ENSMUSG00000051456
chr13	13700000	13799999	-0.0574392	-4.07312	ENSMUSG00000019726
chr13	14200000	14299999	0.00949171	-6.39002	ENSMUSG00000039219 ENSMUSG00000077802
chr13	14300000	14399999	-0.154257	-4.84283
chr13	14500000	14599999	-0.443878	-4.80678
chr13	18200000	18299999	-0.443141	-5.37682
chr13	18300000	18399999	-0.767052	-5.13126
chr13	24500000	24599999	0.311772	-3.7894	ENSMUSG00000083165 ENSMUSG00000089413
chr13	25900000	25999999	-0.588435	4.01535
chr13	32700000	32799999	-0.291995	-4.71797
chr13	32800000	32899999	0.013727	-5.0655	ENSMUSG00000044951 ENSMUSG00000042874
chr13	37500000	37599999	1.08255	5.23243
chr13	37600000	37699999	0.86717	4.61856
chr13	37700000	37799999	1.03114	4.7756
chr13	37800000	37899999	1.14173	4.65905
chr13	37900000	37999999	1.2278	3.8228	ENSMUSG00000039087
chr13	38600000	38699999	0.569777	4.19959	ENSMUSG00000038991
chr13	47400000	47499999	0.506649	5.30556
chr13	47500000	47599999	-0.207861	3.80623
chr13	47700000	47799999	-0.431298	3.85794
chr13	48100000	48199999	-0.0599636	3.91465
chr13	48200000	48299999	0.26541	3.81061
chr13	48300000	48399999	0.408872	5.64772	ENSMUSG00000021379 ENSMUSG00000087671
chr13	48400000	48499999	0.465943	7.50734
chr13	51900000	51999999	1.29414	3.73253	ENSMUSG00000021453
chr13	52900000	52999999	0.676022	3.77294	ENSMUSG00000021460
chr13	53000000	53099999	0.819672	4.41111	ENSMUSG00000065771 ENSMUSG00000056749
chr13	53200000	53299999	0.985402	4.88603	ENSMUSG00000021464
chr13	53500000	53599999	0.799803	5.87135	ENSMUSG00000021469
chr13	53600000	53699999	0.448456	3.95213	ENSMUSG00000063166
chr13	56100000	56199999	0.963077	4.05841	ENSMUSG00000091213
chr13	56200000	56299999	0.97755	4.71355	ENSMUSG00000015937 ENSMUSG00000077799 ENSMUSG00000049625
chr13	56300000	56399999	0.859358	5.66635	ENSMUSG00000087493 ENSMUSG00000048904 ENSMUSG00000021508
chr13	56400000	56499999	0.737572	6.0885	ENSMUSG00000088149 ENSMUSG00000074885
chr13	56600000	56699999	0.836422	6.06617	ENSMUSG00000035509 ENSMUSG00000021539
chr13	58600000	58699999	0.91115	10.5603	ENSMUSG00000021553
chr13	60100000	60199999	0.471658	4.8702
chr13	63300000	63399999	1.06516	3.73302	ENSMUSG00000086950
chr13	64000000	64099999	1.20277	3.75161
chr13	68700000	68799999	-0.547465	-3.71727	ENSMUSG00000034617 ENSMUSG00000021532 ENSMUSG00000021534
chr13	68800000	68899999	-0.986513	-5.10016
chr13	68900000	68999999	-0.914661	-5.01817
chr13	69100000	69199999	-0.966891	-5.09175
chr13	69200000	69299999	-0.765929	-4.75704
chr13	69300000	69399999	-0.724162	-4.43776
chr13	69800000	69899999	0.290057	4.54598	ENSMUSG00000052981
chr13	73800000	73899999	1.00364	4.35179	ENSMUSG00000021612 ENSMUSG00000021565 ENSMUSG00000021566
chr13	73900000	73999999	0.998433	4.29113	ENSMUSG00000017756 ENSMUSG00000021567 ENSMUSG00000066714
chr13	76700000	76799999	-0.732459	-4.46612	ENSMUSG00000077695
chr13	76800000	76899999	-0.770637	-4.45958	ENSMUSG00000090027
chr13	77200000	77299999	-0.71479	-5.93495	ENSMUSG00000021597
chr13	77300000	77399999	-0.666507	-4.82796
chr13	77400000	77499999	-0.848422	-5.06105
chr13	77500000	77599999	-0.983772	-6.16041
chr13	77600000	77699999	-1.02663	-6.17269
chr13	77900000	77999999	-0.927216	-6.61313
chr13	80700000	80799999	-0.91106	-4.09886
chr13	80800000	80899999	-0.723031	-3.95456
chr13	80900000	80999999	-0.544069	-4.30011
chr13	81100000	81199999	-0.353784	-4.91739	ENSMUSG00000085266
chr13	81200000	81299999	-0.367865	-6.10041	ENSMUSG00000043889 ENSMUSG00000092650
chr13	81300000	81399999	-0.533994	-4.17339
chr13	82000000	82099999	-0.53567	-4.54567
chr13	82200000	82299999	-0.961777	-6.43107
chr13	82300000	82399999	-0.85477	-4.70064
chr13	83400000	83499999	-0.91453	-4.36946
chr13	83500000	83599999	-0.951803	-7.92009
chr13	83600000	83699999	-0.858582	-8.74254
chr13	83700000	83799999	-0.491322	-5.82764	ENSMUSG00000005583
chr13	83800000	83899999	-0.544423	-4.11372	ENSMUSG00000050334 ENSMUSG00000091547 ENSMUSG00000065424
chr13	8400000	8499999	-1.18531	-5.18629
chr13	84000000	84099999	-0.920636	-6.47961
chr13	84100000	84199999	-0.973609	-6.32051
chr13	84200000	84299999	-0.881052	-5.87194
chr13	84300000	84399999	-0.993314	-7.33455	ENSMUSG00000092840 ENSMUSG00000092067 ENSMUSG00000035762
chr13	84400000	84499999	-0.817536	-5.04217
chr13	84500000	84599999	-0.85947	-4.62874	ENSMUSG00000091767
chr13	84900000	84999999	-0.86898	-3.72123
chr13	8500000	8599999	-0.825088	-5.2399
chr13	85400000	85499999	-0.727987	-3.79692
chr13	85500000	85599999	-0.901904	-4.20042
chr13	85600000	85699999	-0.964786	-4.24747
chr13	85900000	85999999	-0.963246	-4.0981
chr13	89500000	89599999	-0.970117	-4.61206
chr13	89600000	89699999	-0.933916	-5.20418	ENSMUSG00000093349
chr13	89800000	89899999	-0.41165	-3.88393	ENSMUSG00000021614 ENSMUSG00000089972
chr13	89900000	89999999	-0.241669	-5.03222	ENSMUSG00000089940
chr13	90000000	90099999	-0.301026	-4.42801	ENSMUSG00000089070
chr13	90100000	90199999	-0.362345	-4.77012
chr13	90800000	90899999	-0.5089	-4.05869
chr13	90900000	90999999	-0.250342	-4.50804
chr13	91000000	91099999	0.0337148	-4.10388	ENSMUSG00000078958 ENSMUSG00000049517
chr13	91100000	91199999	-0.151675	-4.61719
chr13	91200000	91299999	-0.282511	-4.54723
chr13	91700000	91799999	-0.383962	-4.62241
chr13	91800000	91899999	-0.347129	-4.48788	ENSMUSG00000074782 ENSMUSG00000077278 ENSMUSG00000084452
chr13	92000000	92099999	-0.417242	-5.46439	ENSMUSG00000021622 ENSMUSG00000082488
chr13	92900000	92999999	-0.265014	-4.83944
chr13	93000000	93099999	-0.114579	-4.33217	ENSMUSG00000014850
chr13	93500000	93599999	0.0311711	-3.99491	ENSMUSG00000021702
chr13	93600000	93699999	-0.321838	-5.76049	ENSMUSG00000021704
chr13	93700000	93799999	-0.248688	-5.40057
chr13	93800000	93899999	-0.121639	-4.07681	ENSMUSG00000047419
chr13	93900000	93999999	0.0109508	-4.66271	ENSMUSG00000042167
chr13	94000000	94099999	-0.0119134	-5.37089
chr13	94100000	94199999	-0.0337085	-5.45322	ENSMUSG00000007617
chr13	94200000	94299999	0.121162	-4.90381	ENSMUSG00000021690 ENSMUSG00000070428
chr13	94300000	94399999	0.134114	-3.87045	ENSMUSG00000074768 ENSMUSG00000085834
chr13	94400000	94499999	0.0427398	-4.00152	ENSMUSG00000042118 ENSMUSG00000042102 ENSMUSG00000087334 ENSMUSG00000085202
chr13	94500000	94599999	0.0340969	-3.96821
chr13	98100000	98199999	1.41721	3.90363
chr13	98200000	98299999	1.34446	4.41903	ENSMUSG00000078952
chr13	98300000	98399999	1.31897	4.93751
chr13	98400000	98499999	1.30802	4.85901
chr13	98500000	98599999	1.19585	4.8481	ENSMUSG00000054944 ENSMUSG00000079172 ENSMUSG00000057657
chr13	98600000	98699999	1.25596	5.69745
chr13	98700000	98799999	1.02495	4.41277
chr13	99700000	99799999	1.26346	5.11076	ENSMUSG00000045022
chr13	99800000	99899999	1.07938	5.2432	ENSMUSG00000089488 ENSMUSG00000074744
chr13	99900000	99999999	1.14764	3.73396	ENSMUSG00000050919
chr14	11200000	11299999	-1.08621	-5.53894	ENSMUSG00000077948
chr14	11400000	11499999	-0.966429	-5.11135
chr14	11500000	11599999	-0.899463	-4.07878	ENSMUSG00000089833
chr14	11600000	11699999	-0.774509	-4.3374
chr14	11900000	11999999	-0.764635	-4.26434
chr14	12000000	12099999	-0.464198	-4.4921	ENSMUSG00000089785 ENSMUSG00000072714
chr14	123200000	123299999	-0.0268811	-3.90798	ENSMUSG00000041625
chr14	13300000	13399999	-0.416444	-3.87173
chr14	13400000	13499999	-0.602745	-4.16045
chr14	13500000	13599999	-0.840927	-4.93317
chr14	13600000	13699999	-0.751703	-4.50155
chr14	13700000	13799999	-0.864045	-4.49303	ENSMUSG00000021741
chr14	13800000	13899999	-0.85551	-4.5137
chr14	14800000	14899999	-0.232072	-3.87327	ENSMUSG00000021738
chr14	15600000	15699999	-0.465705	-3.87617
chr14	18700000	18799999	-0.613161	-3.78753	ENSMUSG00000084722
chr14	19200000	19299999	0.281351	-5.48107	ENSMUSG00000065858
chr14	19300000	19399999	0.0502336	-6.209	ENSMUSG00000092756 ENSMUSG00000035129
chr14	19400000	19499999	-0.359377	-6.85266
chr14	19500000	19599999	-0.703227	-8.87486
chr14	19700000	19799999	-0.50742	-4.76052
chr14	22800000	22899999	0.546655	3.96605	ENSMUSG00000039081
chr14	24700000	24799999	-0.0653914	-4.11152
chr14	24800000	24899999	0.265549	-5.26481	ENSMUSG00000090381
chr14	24900000	24999999	0.569844	-4.65202
chr14	26000000	26099999	0.802733	4.02738
chr14	26100000	26199999	1.05825	4.44976	ENSMUSG00000091164
chr14	32600000	32699999	1.36465	4.49307	ENSMUSG00000093191
chr14	33100000	33199999	1.03747	4.32726	ENSMUSG00000090459 ENSMUSG00000021913 ENSMUSG00000072473
chr14	33200000	33299999	0.664301	3.77664	ENSMUSG00000021919 ENSMUSG00000090669
chr14	33400000	33499999	0.303621	4.16258	ENSMUSG00000041730 ENSMUSG00000071540
chr14	36400000	36499999	-0.51516	3.86766	ENSMUSG00000089368
chr14	37800000	37899999	-0.316079	-4.69726	ENSMUSG00000021804 ENSMUSG00000041044 ENSMUSG00000043418
chr14	41100000	41199999	-1.26127	-5.18914	ENSMUSG00000088714
chr14	41200000	41299999	-1.16551	-4.41036	ENSMUSG00000092818 ENSMUSG00000075785
chr14	41300000	41399999	-1.08172	-3.75911
chr14	45600000	45699999	-0.336231	-4.74407	ENSMUSG00000090709 ENSMUSG00000037759
chr14	47400000	47499999	0.813739	-3.94313	ENSMUSG00000015759 ENSMUSG00000062014 ENSMUSG00000061510 ENSMUSG00000055128
chr14	47600000	47699999	0.918122	-4.53314
chr14	50300000	50399999	-0.377321	-4.52811	ENSMUSG00000036242 ENSMUSG00000082967
chr14	57200000	57299999	0.940327	3.73466	ENSMUSG00000054509 ENSMUSG00000090038
chr14	57900000	57999999	1.2047	4.81708	ENSMUSG00000021947 ENSMUSG00000077497
chr14	58100000	58199999	1.44247	3.94466	ENSMUSG00000086486 ENSMUSG00000050222 ENSMUSG00000021951 ENSMUSG00000091883
chr14	58500000	58599999	1.23177	4.40287	ENSMUSG00000021973
chr14	58600000	58699999	0.823941	6.02488	ENSMUSG00000091596
chr14	58800000	58899999	-0.0251255	5.27392
chr14	60000000	60099999	-0.0110651	-5.4467	ENSMUSG00000091144 ENSMUSG00000071350 ENSMUSG00000089643
chr14	60100000	60199999	0.0767208	-5.08356	ENSMUSG00000021981 ENSMUSG00000021982
chr14	64800000	64899999	0.55371	5.32018
chr14	64900000	64999999	0.89806	6.19084
chr14	65000000	65099999	1.09092	7.27365
chr14	65100000	65199999	1.12043	7.41359
chr14	68200000	68299999	0.718779	5.94624
chr14	68600000	68699999	0.608447	4.02418
chr14	71100000	71199999	1.06779	5.12315	ENSMUSG00000022100 ENSMUSG00000022102
chr14	71200000	71299999	0.684178	5.18942
chr14	71300000	71399999	0.319553	4.50137	ENSMUSG00000022103
chr14	71400000	71499999	-0.221431	4.14335
chr14	72600000	72699999	-0.896944	-4.41392
chr14	72700000	72799999	-0.783073	-5.88405
chr14	72900000	72999999	-0.264992	-5.82871	ENSMUSG00000090216
chr14	73000000	73099999	-0.353245	-4.25465	ENSMUSG00000033487
chr14	76900000	76999999	1.17992	4.573	ENSMUSG00000085974 ENSMUSG00000052584
chr14	77000000	77099999	1.05711	3.86252
chr14	77100000	77199999	0.998181	4.39797
chr14	77200000	77299999	0.890718	5.12464
chr14	77300000	77399999	0.798253	5.54285
chr14	77400000	77499999	0.537023	3.94702	ENSMUSG00000044350 ENSMUSG00000034795
chr14	81700000	81799999	-0.907409	-4.38431
chr14	81800000	81899999	-0.689897	-3.74067
chr14	82800000	82899999	-0.663415	-3.99034	ENSMUSG00000088757
chr14	83100000	83199999	-0.718552	-4.2951
chr14	83200000	83299999	-0.728016	-4.25567
chr14	87000000	87099999	-0.798996	-5.14907
chr14	87100000	87199999	-0.867247	-4.14917
chr14	87200000	87299999	-0.980896	-4.86168
chr14	87300000	87399999	-0.87418	-5.43458
chr14	87400000	87499999	-0.602736	-4.98606
chr14	87500000	87599999	-0.16712	-3.91061
chr14	87700000	87799999	-0.390339	-4.50735	ENSMUSG00000088536
chr14	87800000	87899999	-0.427414	-3.88589	ENSMUSG00000022019
chr14	87900000	87999999	-0.707359	-4.34823
chr14	88000000	88099999	-0.975222	-4.4529
chr14	88100000	88199999	-1.05664	-4.18736
chr14	95100000	95199999	-0.552118	3.96567
chr15	10100000	10199999	-0.482091	-4.56183
chr15	101300000	101399999	0.768187	3.8301	ENSMUSG00000067614 ENSMUSG00000067613 ENSMUSG00000044294 ENSMUSG00000049548 ENSMUSG00000048699 ENSMUSG00000022986
chr15	10200000	10299999	-0.213058	-4.55135	ENSMUSG00000005268
chr15	17800000	17899999	-0.81559	-4.27839	ENSMUSG00000088133
chr15	17900000	17999999	-0.915104	-4.84071	ENSMUSG00000088946
chr15	21300000	21399999	-0.927587	-5.87663
chr15	21800000	21899999	-0.75271	-4.57049
chr15	22300000	22399999	-0.986446	-7.65812
chr15	23100000	23199999	-1.07865	-3.86989
chr15	23900000	23999999	-0.761733	-4.75855
chr15	24000000	24099999	-0.761654	-5.26575
chr15	24100000	24199999	-0.824623	-5.46286
chr15	24200000	24299999	-0.728834	-4.69944
chr15	24300000	24399999	-0.883458	-5.85197
chr15	24400000	24499999	-0.704452	-4.50762
chr15	26300000	26399999	-1.01279	-4.08549
chr15	26400000	26499999	-0.937615	-4.24789
chr15	26700000	26799999	-1.06341	-4.04662
chr15	29200000	29299999	-1.0847	-5.49544
chr15	29300000	29399999	-0.885448	-4.66458
chr15	29500000	29599999	-0.840202	-4.72047
chr15	29600000	29699999	-0.828475	-4.68351	ENSMUSG00000092639
chr15	37800000	37899999	0.764616	-4.39986	ENSMUSG00000022292 ENSMUSG00000085442
chr15	38300000	38399999	1.21905	-4.06835	ENSMUSG00000090879
chr15	49300000	49399999	-1.06978	-4.91631	ENSMUSG00000065760
chr15	58000000	58099999	1.37967	4.75786	ENSMUSG00000022358
chr15	58100000	58199999	1.19462	4.64917	ENSMUSG00000086801 ENSMUSG00000022357 ENSMUSG00000055114
chr15	58200000	58299999	1.05159	4.26647	ENSMUSG00000037119
chr15	58400000	58499999	0.514873	3.72722
chr15	58700000	58799999	1.11638	3.94074	ENSMUSG00000037085 ENSMUSG00000037075 ENSMUSG00000050891 ENSMUSG00000022354
chr15	58800000	58899999	1.36607	4.58545	ENSMUSG00000022353
chr15	58900000	58999999	1.43085	6.05791
chr15	59000000	59099999	1.3113	4.90779	ENSMUSG00000025922
chr15	59100000	59199999	1.25949	3.84187	ENSMUSG00000022351 ENSMUSG00000022350
chr15	60800000	60899999	-0.768339	-3.86533
chr15	6800000	6899999	0.853734	3.8218
chr15	6900000	6999999	0.927391	4.48741
chr15	7000000	7099999	1.1564	6.05759
chr15	7100000	7199999	0.958147	4.66481	ENSMUSG00000054263
chr15	7200000	7299999	0.360844	4.19344	ENSMUSG00000042961 ENSMUSG00000089966
chr15	7300000	7399999	0.126042	4.66328	ENSMUSG00000090199
chr15	7400000	7499999	0.069889	5.00941
chr15	7600000	7699999	-0.0576353	3.82387
chr15	80800000	80899999	1.03173	-5.9906	ENSMUSG00000042303 ENSMUSG00000064587
chr15	84200000	84299999	0.976672	4.01664	ENSMUSG00000062760
chr15	84300000	84399999	1.15409	4.34756	ENSMUSG00000055745
chr15	85900000	85999999	1.46965	4.05575	ENSMUSG00000035900 ENSMUSG00000089680 ENSMUSG00000035891 ENSMUSG00000088357
chr15	86300000	86399999	0.000645592	4.91828
chr15	95600000	95699999	0.844051	4.12978	ENSMUSG00000043329 ENSMUSG00000078648
chr15	95800000	95899999	0.802195	3.73173	ENSMUSG00000078925
chr15	96100000	96199999	1.09016	4.20942	ENSMUSG00000033237
chr15	96200000	96299999	1.10238	5.08526	ENSMUSG00000033228
chr16	11100000	11199999	1.29649	-4.05525	ENSMUSG00000022498 ENSMUSG00000037965 ENSMUSG00000076258 ENSMUSG00000064565 ENSMUSG00000085780 ENSMUSG00000080790 ENSMUSG00000081052 ENSMUSG00000005846
chr16	12400000	12499999	-0.841145	-3.71429
chr16	12500000	12599999	-0.929553	-4.48524
chr16	18200000	18299999	1.48295	4.09185	ENSMUSG00000090777 ENSMUSG00000060166 ENSMUSG00000005732 ENSMUSG00000080364 ENSMUSG00000022721 ENSMUSG00000022718 ENSMUSG00000080452 ENSMUSG00000093246
chr16	19800000	19899999	-0.215239	-4.99502	ENSMUSG00000075330
chr16	23600000	23699999	-0.291152	-4.01099	ENSMUSG00000033355
chr16	27100000	27199999	-1.16107	-4.60613
chr16	27200000	27299999	-1.06705	-6.10419
chr16	27300000	27399999	-0.936024	-6.61642	ENSMUSG00000052276 ENSMUSG00000089705 ENSMUSG00000056423
chr16	27400000	27499999	-0.826857	-5.59414	ENSMUSG00000038127
chr16	27500000	27599999	-0.918875	-5.09356
chr16	27600000	27699999	-0.899832	-5.21099
chr16	27800000	27899999	-0.899996	-5.34435
chr16	27900000	27999999	-1.08871	-5.37667
chr16	28000000	28099999	-0.85977	-4.17404
chr16	28100000	28199999	-0.818135	-4.15946
chr16	28200000	28299999	-0.994009	-4.13363
chr16	28300000	28399999	-1.0874	-4.78649
chr16	29500000	29599999	0.908007	4.34647
chr16	29600000	29699999	1.26833	4.73662	ENSMUSG00000038084
chr16	29700000	29799999	1.50989	5.8814
chr16	29800000	29899999	1.46191	5.02708	ENSMUSG00000090506
chr16	29900000	29999999	1.4031	4.51771	ENSMUSG00000084810 ENSMUSG00000075286
chr16	30000000	30099999	1.45327	4.57249	ENSMUSG00000086897 ENSMUSG00000022528
chr16	30100000	30199999	1.41151	4.17904	ENSMUSG00000084444
chr16	30300000	30399999	1.50588	4.72942	ENSMUSG00000047953 ENSMUSG00000022533
chr16	30500000	30599999	1.45299	4.829	ENSMUSG00000022537 ENSMUSG00000022538
chr16	30600000	30699999	1.61217	7.23151	ENSMUSG00000046546
chr16	30700000	30799999	1.37599	6.59078
chr16	30800000	30899999	1.15636	5.35337	ENSMUSG00000064754 ENSMUSG00000088782
chr16	30900000	30999999	1.08322	4.01386	ENSMUSG00000087605
chr16	3700000	3799999	0.503719	-3.73246	ENSMUSG00000022534 ENSMUSG00000022529
chr16	37000000	37099999	-0.116859	-3.99384	ENSMUSG00000034206
chr16	41700000	41799999	-1.04242	-3.72477
chr16	41900000	41999999	-1.07544	-6.93035
chr16	42000000	42099999	-0.84635	-5.87464
chr16	42100000	42199999	-0.475948	-4.73618
chr16	42200000	42299999	-0.371025	-4.13711	ENSMUSG00000047261
chr16	45000000	45099999	0.00298876	-3.97363
chr16	45300000	45399999	-0.391874	-6.80446	ENSMUSG00000022661
chr16	45600000	45699999	-0.179607	-5.59716	ENSMUSG00000022659 ENSMUSG00000033187 ENSMUSG00000033177
chr16	46900000	46999999	-0.943817	-4.16017
chr16	47800000	47899999	-1.1062	-5.18528
chr16	50800000	50899999	-0.776175	-4.39743
chr16	50900000	50999999	-0.889888	-5.37524	ENSMUSG00000065032
chr16	51000000	51099999	-0.877292	-5.24091
chr16	59000000	59099999	-0.856155	-4.42112	ENSMUSG00000047960 ENSMUSG00000043357 ENSMUSG00000064006 ENSMUSG00000057533 ENSMUSG00000059041
chr16	63100000	63199999	-1.03142	-4.10076
chr16	73200000	73299999	-0.82194	-4.57545
chr16	73300000	73399999	-1.10729	-5.48912
chr16	75000000	75099999	-1.01622	-4.83412
chr16	75100000	75199999	-0.865001	-4.28028
chr16	75200000	75299999	-1.07107	-5.36281
chr16	75300000	75399999	-0.949906	-4.82719
chr16	75400000	75499999	-0.967303	-4.62363
chr16	75900000	75999999	-1.0712	-3.86782	ENSMUSG00000022876
chr16	76000000	76099999	-1.16023	-4.27856	ENSMUSG00000087214
chr16	92500000	92599999	0.837039	3.78781	ENSMUSG00000022949
chr16	95800000	95899999	0.371835	4.26023
chr16	9600000	9699999	-0.845829	-4.13273
chr17	10100000	10199999	0.10612	3.97887
chr17	10200000	10299999	0.257308	4.33902
chr17	10300000	10399999	0.441909	4.75766
chr17	10400000	10499999	0.699808	3.72809	ENSMUSG00000062078
chr17	10500000	10599999	0.825932	6.27438	ENSMUSG00000044407
chr17	10600000	10699999	0.610005	6.46502	ENSMUSG00000089633
chr17	10700000	10799999	0.286197	5.36202	ENSMUSG00000089941
chr17	10800000	10899999	0.00762098	4.53676
chr17	10900000	10999999	-0.147209	4.20355
chr17	11900000	11999999	-0.269638	4.35994
chr17	12000000	12099999	0.155991	6.99056
chr17	12100000	12199999	0.538826	7.03921
chr17	12200000	12299999	0.828314	6.59878
chr17	12300000	12399999	0.951558	6.31832	ENSMUSG00000023827 ENSMUSG00000063911
chr17	12600000	12699999	0.429258	5.47483	ENSMUSG00000023828
chr17	12900000	12999999	1.22364	4.69314	ENSMUSG00000023830 ENSMUSG00000078247 ENSMUSG00000089525
chr17	13000000	13099999	1.05239	4.14458	ENSMUSG00000089769 ENSMUSG00000089817 ENSMUSG00000091640 ENSMUSG00000068037 ENSMUSG00000092913 ENSMUSG00000059408 ENSMUSG00000073460
chr17	13100000	13199999	1.0947	4.71404	ENSMUSG00000057388 ENSMUSG00000068039 ENSMUSG00000065105 ENSMUSG00000064637 ENSMUSG00000062480 ENSMUSG00000023832 ENSMUSG00000089695 ENSMUSG00000060475
chr17	13900000	13999999	0.847157	6.34839	ENSMUSG00000068036 ENSMUSG00000089883
chr17	14000000	14099999	0.703231	6.31017	ENSMUSG00000067941
chr17	14400000	14499999	0.753295	8.65278	ENSMUSG00000023886
chr17	14800000	14899999	0.813605	8.12426	ENSMUSG00000023885 ENSMUSG00000079311
chr17	15000000	15099999	1.28119	13.9887	ENSMUSG00000046991 ENSMUSG00000092577 ENSMUSG00000050088
chr17	15600000	15699999	1.13492	9.64588	ENSMUSG00000014769 ENSMUSG00000014767 ENSMUSG00000014771 ENSMUSG00000091229 ENSMUSG00000051977
chr17	25600000	25699999	1.27082	6.0893	ENSMUSG00000024175 ENSMUSG00000050824
chr17	26900000	26999999	1.36913	5.05492	ENSMUSG00000024191 ENSMUSG00000015579
chr17	32300000	32399999	1.5314	5.18773	ENSMUSG00000037577 ENSMUSG00000024002
chr17	32400000	32499999	1.453	4.08578	ENSMUSG00000091543 ENSMUSG00000024045 ENSMUSG00000002625
chr17	43600000	43699999	0.334569	5.65321	ENSMUSG00000023914
chr17	43700000	43799999	0.425124	6.77132	ENSMUSG00000023913 ENSMUSG00000090307 ENSMUSG00000040140 ENSMUSG00000023912
chr17	43800000	43899999	0.169288	6.31214	ENSMUSG00000023963 ENSMUSG00000084474
chr17	50200000	50299999	-0.324413	-4.28247	ENSMUSG00000039316
chr17	50300000	50399999	-0.219653	-4.61462	ENSMUSG00000067103
chr17	50600000	50699999	-0.472913	-3.93568
chr17	50700000	50799999	-0.624247	-3.94801	ENSMUSG00000038910
chr17	51200000	51299999	-0.723293	-5.49795
chr17	51300000	51399999	-0.775265	-6.52554
chr17	51400000	51499999	-0.771418	-4.62095
chr17	51500000	51599999	-0.802382	-4.21108
chr17	51600000	51699999	-0.902247	-5.46351
chr17	51700000	51799999	-0.775105	-3.89827
chr17	52100000	52199999	-1.13216	-4.68987
chr17	52200000	52299999	-1.23596	-5.7691
chr17	52300000	52399999	-1.24794	-5.12018
chr17	52500000	52599999	-1.12368	-4.43027	ENSMUSG00000078067
chr17	54400000	54499999	-1.06558	-4.84362	ENSMUSG00000023945
chr17	62500000	62599999	-0.682843	-4.61155
chr17	62600000	62699999	-0.693273	-4.98045
chr17	62700000	62799999	-0.605065	-4.31189
chr17	63000000	63099999	-0.314946	-3.96112
chr17	63100000	63199999	-0.137051	-4.12726
chr17	65400000	65499999	-1.10313	-5.17233
chr17	65500000	65599999	-0.916384	-4.54898
chr17	69000000	69099999	-1.09933	-3.92592
chr17	70000000	70099999	-1.10739	-4.71821
chr17	70100000	70199999	-1.09166	-5.2745
chr17	70300000	70399999	-1.19189	-9.26403
chr17	70400000	70499999	-0.981494	-6.9096
chr17	70500000	70599999	-0.97314	-5.75653
chr17	70600000	70699999	-0.744235	-4.14569
chr17	78200000	78299999	-1.19611	-5.32916
chr17	78300000	78399999	-1.18963	-6.23611
chr17	78400000	78499999	-1.06376	-6.6042
chr17	78500000	78599999	-0.916804	-8.44521	ENSMUSG00000037064
chr17	78700000	78799999	-0.24584	-4.18829	ENSMUSG00000092979 ENSMUSG00000056121
chr17	78800000	78899999	0.0333283	-4.12479	ENSMUSG00000061062
chr17	79400000	79499999	0.794519	-4.25042	ENSMUSG00000024084
chr17	79500000	79599999	0.491178	-3.98282
chr17	8700000	8799999	0.457583	4.77128	ENSMUSG00000084390 ENSMUSG00000091612
chr17	89900000	89999999	-1.29877	-4.80826
chr17	93600000	93699999	-0.87378	-6.59958	ENSMUSG00000024256 ENSMUSG00000075764
chr17	93700000	93799999	-0.672573	-4.56005
chr18	11600000	11699999	-0.241373	-7.03585
chr18	11700000	11799999	-0.0668401	-7.51175
chr18	11800000	11899999	0.0299845	-7.85769	ENSMUSG00000041238
chr18	11900000	11999999	0.414743	-6.41188	ENSMUSG00000087420 ENSMUSG00000084565
chr18	12000000	12099999	0.680431	-6.14815	ENSMUSG00000040957
chr18	12100000	12199999	0.742715	-5.83309
chr18	12200000	12299999	0.84762	-5.64858	ENSMUSG00000049411
chr18	12300000	12399999	0.857842	-5.71064	ENSMUSG00000024404 ENSMUSG00000084748 ENSMUSG00000024410 ENSMUSG00000024413 ENSMUSG00000086935
chr18	12400000	12499999	0.747435	-4.60863	ENSMUSG00000057766 ENSMUSG00000082051
chr18	12500000	12599999	0.561029	-4.83886
chr18	12600000	12699999	0.526404	-5.34464	ENSMUSG00000090309
chr18	12700000	12799999	0.549236	-5.15913	ENSMUSG00000088342
chr18	12800000	12899999	0.666995	-3.85306	ENSMUSG00000024424 ENSMUSG00000087950
chr18	12900000	12999999	0.571222	-3.84062	ENSMUSG00000024430 ENSMUSG00000083332
chr18	15100000	15199999	0.0139259	-3.71597	ENSMUSG00000071867
chr18	15600000	15699999	-1.00266	-4.17422
chr18	15700000	15799999	-0.945167	-4.5357
chr18	16000000	16099999	-1.09043	-5.44202	ENSMUSG00000089454
chr18	16200000	16299999	-0.953939	-4.24248
chr18	23300000	23399999	-0.83881	-3.8323	ENSMUSG00000077680
chr18	23400000	23499999	-0.945345	-4.89846
chr18	25600000	25699999	0.687643	3.82495
chr18	29200000	29299999	-0.71884	3.98228
chr18	31500000	31599999	-0.0889628	3.7605	ENSMUSG00000076996
chr18	3300000	3399999	-0.279351	-6.52768	ENSMUSG00000063889 ENSMUSG00000091488
chr18	34000000	34099999	0.965437	5.49864
chr18	34200000	34299999	1.39821	5.4373	ENSMUSG00000077263
chr18	34400000	34499999	1.57032	4.33492	ENSMUSG00000005871 ENSMUSG00000014504
chr18	37300000	37399999	-0.653139	-5.06431	ENSMUSG00000073593
chr18	37400000	37499999	-0.744352	-5.8439	ENSMUSG00000051663 ENSMUSG00000051599 ENSMUSG00000045498 ENSMUSG00000045689 ENSMUSG00000063687 ENSMUSG00000051678
chr18	39300000	39399999	0.311304	-4.19539
chr18	4000000	4099999	-0.741379	-4.05237
chr18	41900000	41999999	-1.01507	-3.96436
chr18	43000000	43099999	-0.707428	-3.83697	ENSMUSG00000084959
chr18	43100000	43199999	-0.820654	-4.38575
chr18	43400000	43499999	-0.428487	-4.69888	ENSMUSG00000039954
chr18	43500000	43599999	-0.205826	-5.16623	ENSMUSG00000024501
chr18	43600000	43699999	-0.392488	-5.13084	ENSMUSG00000043424
chr18	43700000	43799999	-0.466721	-4.38108	ENSMUSG00000024502
chr18	43800000	43899999	-0.611272	-4.97672	ENSMUSG00000024503
chr18	43900000	43999999	-0.747553	-6.38541	ENSMUSG00000088732 ENSMUSG00000038791 ENSMUSG00000071858
chr18	44000000	44099999	-0.71305	-5.65986
chr18	44100000	44199999	-0.724953	-5.34178	ENSMUSG00000055561 ENSMUSG00000051050
chr18	47800000	47899999	-0.536504	-4.28373
chr18	47900000	47999999	-0.710227	-5.1805
chr18	48000000	48099999	-0.891536	-5.98455
chr18	48100000	48199999	-1.08968	-5.82414
chr18	48200000	48299999	-0.782175	-4.12584	ENSMUSG00000059040
chr18	48800000	48899999	-0.609239	4.17612
chr18	51400000	51499999	-0.956916	-4.91172	ENSMUSG00000064820
chr18	65300000	65399999	0.703349	-4.52756
chr18	65400000	65499999	0.943313	-4.70086	ENSMUSG00000065402 ENSMUSG00000032845 ENSMUSG00000073546
chr18	67100000	67199999	0.0571216	4.57511
chr18	68100000	68199999	1.26728	5.18505
chr18	68200000	68299999	1.01867	4.58995
chr18	76000000	76099999	1.104	5.19847
chr18	76100000	76199999	0.878788	5.29839
chr18	76200000	76299999	1.03702	5.29037
chr18	80300000	80399999	1.26397	3.84698	ENSMUSG00000053950 ENSMUSG00000024570
chr18	80500000	80599999	1.07269	5.50017	ENSMUSG00000087218
chr18	80600000	80699999	1.14348	8.35584	ENSMUSG00000033323
chr18	80700000	80799999	0.890836	7.26144
chr18	80800000	80899999	0.819447	6.30225	ENSMUSG00000033016
chr18	80900000	80999999	0.648778	5.26847
chr18	81000000	81099999	0.432695	6.26123	ENSMUSG00000024566
chr18	81300000	81399999	-0.0598665	5.26164
chr18	81400000	81499999	-0.256714	3.83467
chr18	82700000	82799999	0.836638	4.39013
chr18	82900000	82999999	1.05804	6.23939
chr18	83000000	83099999	1.13578	4.3144	ENSMUSG00000085190
chr18	83200000	83299999	0.297798	7.52841
chr18	83300000	83399999	-0.259761	5.97122
chr18	83400000	83499999	-0.564872	4.74546
chr18	84800000	84899999	0.274346	4.76355	ENSMUSG00000092056 ENSMUSG00000024644 ENSMUSG00000089760 ENSMUSG00000047992
chr18	84900000	84999999	0.290364	5.91654	ENSMUSG00000089410 ENSMUSG00000065746 ENSMUSG00000092153 ENSMUSG00000088070
chr18	85000000	85099999	0.303328	4.17227	ENSMUSG00000024646 ENSMUSG00000089744
chr18	89300000	89399999	-1.07122	-3.74439
chr18	89400000	89499999	-1.16849	-4.1508	ENSMUSG00000034028 ENSMUSG00000043498
chr18	9600000	9699999	-0.149292	-6.57755	ENSMUSG00000088996 ENSMUSG00000050996
chr18	9700000	9799999	-0.131193	-4.2527	ENSMUSG00000036103 ENSMUSG00000091285 ENSMUSG00000089054
chr19	10800000	10899999	1.5003	3.86438	ENSMUSG00000024669 ENSMUSG00000067577 ENSMUSG00000024670
chr19	10900000	10999999	1.28691	4.82812	ENSMUSG00000024737 ENSMUSG00000024736 ENSMUSG00000034659 ENSMUSG00000024735 ENSMUSG00000024734
chr19	11000000	11099999	0.972881	4.04276	ENSMUSG00000034117 ENSMUSG00000024732 ENSMUSG00000024731 ENSMUSG00000067571
chr19	14300000	14399999	-0.210031	3.82081
chr19	14400000	14499999	0.151088	4.46838
chr19	14500000	14599999	0.48737	4.85285	ENSMUSG00000024642
chr19	14600000	14699999	0.678554	3.98881
chr19	14700000	14799999	0.483542	4.44882	ENSMUSG00000084675
chr19	15600000	15699999	-0.867482	-3.90614
chr19	15700000	15799999	-0.697364	-3.92896	ENSMUSG00000065323
chr19	19200000	19299999	-1.17805	-4.8766
chr19	19300000	19399999	-1.01926	-4.47465	ENSMUSG00000088907
chr19	19400000	19499999	-1.00933	-4.9664
chr19	19500000	19599999	-1.05747	-5.03888
chr19	19600000	19699999	-0.967978	-4.5665
chr19	19700000	19799999	-0.983965	-4.49089
chr19	21000000	21099999	-0.625809	-3.99455
chr19	21300000	21399999	-0.492772	-4.19646	ENSMUSG00000024750
chr19	21400000	21499999	-0.643101	-4.08598
chr19	22100000	22199999	-0.616886	-4.03734
chr19	26500000	26599999	-0.802852	-4.15762
chr19	26600000	26699999	-0.654091	-4.44582
chr19	26700000	26799999	-0.403068	-4.46442	ENSMUSG00000024921
chr19	29700000	29799999	1.1828	5.11069	ENSMUSG00000046324 ENSMUSG00000024806 ENSMUSG00000046138
chr19	30700000	30799999	-0.698034	-4.13106	ENSMUSG00000084432
chr19	30800000	30899999	-0.950696	-5.17105
chr19	30900000	30999999	-0.778696	-4.95438
chr19	34700000	34799999	-0.294131	-4.4271	ENSMUSG00000067297 ENSMUSG00000034459 ENSMUSG00000009378
chr19	34800000	34899999	-0.0359008	-5.6242	ENSMUSG00000088212 ENSMUSG00000065594
chr19	34900000	34999999	0.250346	-3.77928	ENSMUSG00000033610 ENSMUSG00000077993
chr19	35400000	35499999	-1.17085	-5.01045
chr19	35500000	35599999	-1.1967	-5.61228
chr19	35600000	35699999	-1.25034	-5.90046	ENSMUSG00000092715
chr19	35800000	35899999	-1.11792	-4.53254	ENSMUSG00000077205
chr19	38500000	38599999	1.08127	3.93003	ENSMUSG00000088940
chr19	40300000	40399999	0.48574	-6.04971	ENSMUSG00000055044
chr19	42600000	42699999	0.685274	4.32862	ENSMUSG00000025184 ENSMUSG00000090117 ENSMUSG00000025185
chr19	42800000	42899999	0.269777	4.97999	ENSMUSG00000060224 ENSMUSG00000025188 ENSMUSG00000090235
chr19	43300000	43399999	-0.355312	3.97277	ENSMUSG00000047509
chr19	43400000	43499999	0.261501	5.20363
chr19	43500000	43599999	0.799361	4.42817	ENSMUSG00000025189 ENSMUSG00000025190
chr19	43600000	43699999	1.04514	3.97888	ENSMUSG00000092250 ENSMUSG00000044220 ENSMUSG00000092871
chr19	43700000	43799999	1.296	4.30208	ENSMUSG00000040414 ENSMUSG00000025192
chr19	53800000	53899999	1.38897	4.5542	ENSMUSG00000043639 ENSMUSG00000089807 ENSMUSG00000089679
chr19	55000000	55099999	-0.281193	4.73732
chr19	55100000	55199999	0.433557	5.44328	ENSMUSG00000024978
chr19	55200000	55299999	0.798398	6.03747	ENSMUSG00000024979 ENSMUSG00000055523
chr19	55300000	55399999	1.04799	4.05433	ENSMUSG00000024981 ENSMUSG00000024982
chr19	56300000	56399999	0.673409	5.05908	ENSMUSG00000077223 ENSMUSG00000025075
chr19	56400000	56499999	0.807285	7.6666	ENSMUSG00000049134 ENSMUSG00000092491 ENSMUSG00000090990 ENSMUSG00000025076
chr19	56500000	56599999	1.0944	6.93491	ENSMUSG00000035818
chr19	56600000	56699999	1.00734	6.03549	ENSMUSG00000025077 ENSMUSG00000025078
chr19	56700000	56799999	1.14255	6.9755	ENSMUSG00000035283
chr19	56800000	56899999	1.05141	6.46075	ENSMUSG00000067063 ENSMUSG00000035173
chr19	56900000	56999999	1.04784	5.26999	ENSMUSG00000025081 ENSMUSG00000025082
chr19	57000000	57099999	0.961317	3.83984	ENSMUSG00000025083
chr19	57200000	57299999	1.02958	3.79677
chr19	57500000	57599999	1.0962	3.96845	ENSMUSG00000025086 ENSMUSG00000091992
chr19	57600000	57699999	0.958554	4.86635
chr19	57900000	57999999	-0.270968	5.37162
chr19	59700000	59799999	-0.374826	4.22687
chr2	104900000	104999999	0.610018	4.62066	ENSMUSG00000074987 ENSMUSG00000079175 ENSMUSG00000016458
chr2	105000000	105099999	0.397251	4.16207
chr2	10600000	10699999	-0.771989	-4.72092	ENSMUSG00000075532
chr2	10700000	10799999	-0.924778	-6.68622
chr2	10800000	10899999	-1.13478	-7.98057	ENSMUSG00000081367 ENSMUSG00000082871
chr2	10900000	10999999	-0.933035	-8.96971	ENSMUSG00000089007 ENSMUSG00000085257
chr2	109300000	109399999	-0.58951	-3.99139	ENSMUSG00000081746
chr2	11000000	11099999	-0.80457	-6.33597	ENSMUSG00000084560 ENSMUSG00000081693 ENSMUSG00000083900
chr2	11100000	11199999	-0.468648	-5.91216	ENSMUSG00000026778
chr2	11200000	11299999	0.0560278	-5.13364	ENSMUSG00000086006 ENSMUSG00000080905
chr2	113400000	113499999	-0.560777	-4.06319
chr2	113800000	113899999	-0.204921	-4.00557	ENSMUSG00000068615 ENSMUSG00000092201 ENSMUSG00000087694 ENSMUSG00000068614 ENSMUSG00000092397
chr2	113900000	113999999	-0.178988	-5.07419	ENSMUSG00000040383
chr2	114000000	114099999	-0.186226	-4.38604	ENSMUSG00000040321 ENSMUSG00000084620
chr2	114100000	114199999	-0.576303	-5.53984
chr2	114200000	114299999	-0.734231	-6.76141
chr2	114300000	114399999	-1.01014	-6.82307
chr2	114400000	114499999	-1.07001	-4.91363	ENSMUSG00000057147
chr2	11500000	11599999	0.160079	-5.18141	ENSMUSG00000037197 ENSMUSG00000082727 ENSMUSG00000091689 ENSMUSG00000091312 ENSMUSG00000026770
chr2	116600000	116699999	0.361229	3.91135	ENSMUSG00000086462
chr2	116700000	116799999	0.875151	4.38543	ENSMUSG00000027355 ENSMUSG00000085316 ENSMUSG00000088038 ENSMUSG00000087910 ENSMUSG00000065794
chr2	116800000	116899999	1.02276	4.88799	ENSMUSG00000074930
chr2	116900000	116999999	0.960338	3.92127	ENSMUSG00000027351
chr2	118600000	118699999	1.05366	-5.60557	ENSMUSG00000046804 ENSMUSG00000040035 ENSMUSG00000027331 ENSMUSG00000086421 ENSMUSG00000090204 ENSMUSG00000027332
chr2	119100000	119199999	1.05221	-4.05125	ENSMUSG00000084015 ENSMUSG00000034216 ENSMUSG00000074912 ENSMUSG00000027314 ENSMUSG00000027313
chr2	12200000	12299999	-0.183823	4.07347	ENSMUSG00000086843
chr2	122100000	122199999	1.06255	4.15991	ENSMUSG00000068452 ENSMUSG00000027225 ENSMUSG00000027224 ENSMUSG00000033268 ENSMUSG00000033256
chr2	127300000	127399999	0.87701	6.89866	ENSMUSG00000079056 ENSMUSG00000090815 ENSMUSG00000027376 ENSMUSG00000083648
chr2	131500000	131599999	1.11421	4.63078	ENSMUSG00000086831
chr2	131600000	131699999	1.03909	5.24515	ENSMUSG00000086822 ENSMUSG00000081422 ENSMUSG00000083469 ENSMUSG00000037482
chr2	131700000	131799999	1.48989	7.10052	ENSMUSG00000081229 ENSMUSG00000079037 ENSMUSG00000027338
chr2	131800000	131899999	1.2311	4.16446	ENSMUSG00000027339
chr2	136600000	136699999	-0.394408	-3.90997
chr2	13900000	13999999	-0.0384341	-4.66801	ENSMUSG00000063275 ENSMUSG00000086657
chr2	139000000	139099999	-1.12591	-4.37657	ENSMUSG00000082285
chr2	139100000	139199999	-1.16346	-4.977
chr2	139200000	139299999	-1.27662	-7.05812	ENSMUSG00000081799
chr2	139300000	139399999	-0.943367	-4.76235	ENSMUSG00000039092
chr2	14000000	14099999	-0.0313441	-4.23536	ENSMUSG00000026718
chr2	145300000	145399999	-0.343273	4.58726	ENSMUSG00000088213 ENSMUSG00000084178 ENSMUSG00000074753
chr2	145400000	145499999	0.157541	5.54667
chr2	145500000	145599999	0.504866	4.53015	ENSMUSG00000087594 ENSMUSG00000081722
chr2	145600000	145699999	0.68177	4.14607	ENSMUSG00000001768
chr2	145700000	145799999	0.847185	7.50129	ENSMUSG00000092758 ENSMUSG00000083014 ENSMUSG00000002728 ENSMUSG00000001767
chr2	145800000	145899999	0.608174	5.36773
chr2	151700000	151799999	1.20196	4.09686	ENSMUSG00000027460 ENSMUSG00000087004 ENSMUSG00000088491
chr2	155200000	155299999	1.20857	-4.86151	ENSMUSG00000038375 ENSMUSG00000038369 ENSMUSG00000080237
chr2	155300000	155399999	1.21645	-4.22658	ENSMUSG00000083341 ENSMUSG00000027603 ENSMUSG00000027605 ENSMUSG00000086529
chr2	155700000	155799999	1.29456	-5.02366	ENSMUSG00000005882 ENSMUSG00000078972 ENSMUSG00000038259
chr2	162300000	162399999	-0.679304	4.09059
chr2	162400000	162499999	-0.361049	4.43733	ENSMUSG00000054457
chr2	162500000	162599999	0.0703048	5.14519	ENSMUSG00000087536 ENSMUSG00000077143
chr2	162600000	162699999	0.3439	3.74681	ENSMUSG00000082296 ENSMUSG00000088064 ENSMUSG00000086030
chr2	163000000	163099999	1.22426	4.34885	ENSMUSG00000074607
chr2	168300000	168399999	1.12539	3.76101	ENSMUSG00000027544
chr2	168900000	168999999	0.673092	4.59664	ENSMUSG00000086238
chr2	169000000	169099999	0.140999	4.29535	ENSMUSG00000085369
chr2	169100000	169199999	-0.0503797	4.90905	ENSMUSG00000077845
chr2	169200000	169299999	-0.265071	5.6278	ENSMUSG00000086840 ENSMUSG00000085350
chr2	169300000	169399999	-0.359527	4.78821	ENSMUSG00000087074
chr2	169400000	169499999	-0.267778	3.93129	ENSMUSG00000074571 ENSMUSG00000078912
chr2	170700000	170799999	-0.359278	3.74312	ENSMUSG00000080955
chr2	171800000	171899999	-0.473422	4.15627	ENSMUSG00000085426 ENSMUSG00000087100 ENSMUSG00000067578 ENSMUSG00000087409
chr2	171900000	171999999	-0.0836612	6.27949	ENSMUSG00000083793
chr2	17200000	17299999	-0.822461	-4.58531
chr2	172000000	172099999	0.470222	5.96328	ENSMUSG00000038537
chr2	172900000	172999999	0.760789	3.789	ENSMUSG00000070495 ENSMUSG00000087382 ENSMUSG00000027513
chr2	173000000	173099999	0.979949	5.03827	ENSMUSG00000027514 ENSMUSG00000038400
chr2	174600000	174699999	-0.00295712	3.82656	ENSMUSG00000084795 ENSMUSG00000087215 ENSMUSG00000086177
chr2	179300000	179399999	0.262289	3.91332	ENSMUSG00000083410
chr2	20000000	20099999	-0.193805	4.08913
chr2	20200000	20299999	0.329096	3.7344	ENSMUSG00000065253 ENSMUSG00000091457
chr2	20300000	20399999	0.836195	4.7294	ENSMUSG00000085477
chr2	20400000	20499999	0.910182	4.73359
chr2	25600000	25699999	1.05246	5.70205	ENSMUSG00000026936 ENSMUSG00000069080 ENSMUSG00000090073 ENSMUSG00000085484 ENSMUSG00000036401 ENSMUSG00000023210
chr2	25700000	25799999	1.09727	4.23625	ENSMUSG00000059625 ENSMUSG00000058740
chr2	27100000	27199999	1.12278	4.99947	ENSMUSG00000086669
chr2	27300000	27399999	1.35978	3.75892	ENSMUSG00000026918 ENSMUSG00000026917 ENSMUSG00000080538 ENSMUSG00000085929
chr2	27500000	27599999	1.14284	5.49691	ENSMUSG00000015846
chr2	27600000	27699999	1.1081	5.82794
chr2	27800000	27899999	0.736166	4.61685	ENSMUSG00000026837 ENSMUSG00000086560
chr2	28000000	28099999	0.785359	7.35058	ENSMUSG00000026833
chr2	3000000	3099999	-0.628341	-4.79278	ENSMUSG00000050530
chr2	30900000	30999999	1.64617	3.75259	ENSMUSG00000075415
chr2	3100000	3199999	-0.339101	-6.79938
chr2	3200000	3299999	0.120295	-4.4343	ENSMUSG00000026643 ENSMUSG00000075837 ENSMUSG00000049950 ENSMUSG00000026644 ENSMUSG00000026645
chr2	3400000	3499999	0.0720947	-4.36166	ENSMUSG00000051396 ENSMUSG00000079615 ENSMUSG00000039496 ENSMUSG00000081278 ENSMUSG00000082580
chr2	3500000	3599999	0.00252174	-5.07828	ENSMUSG00000080703
chr2	3700000	3799999	-0.178687	-5.83018	ENSMUSG00000085656
chr2	3800000	3899999	-0.254705	-5.26179	ENSMUSG00000086445
chr2	3900000	3999999	-0.262634	-4.35173	ENSMUSG00000086458
chr2	5000000	5099999	1.28891	4.11139	ENSMUSG00000081005
chr2	5200000	5299999	0.912701	3.79207	ENSMUSG00000080820
chr2	5300000	5399999	0.800145	3.73678
chr2	53700000	53799999	-1.02274	-5.54264
chr2	53800000	53899999	-0.87109	-4.29966	ENSMUSG00000089108
chr2	53900000	53999999	-0.892395	-4.47552	ENSMUSG00000075334 ENSMUSG00000064596
chr2	54000000	54099999	-0.871138	-3.94791	ENSMUSG00000082096
chr2	54100000	54199999	-0.942564	-3.87853	ENSMUSG00000080742
chr2	54700000	54799999	-1.10265	-4.95104
chr2	56100000	56199999	-1.06329	-3.91546
chr2	56300000	56399999	-0.978184	-4.91592
chr2	56400000	56499999	-1.02516	-4.79996
chr2	56500000	56599999	-0.9693	-5.00487
chr2	57400000	57499999	-0.880729	-5.19621	ENSMUSG00000081642 ENSMUSG00000084294
chr2	57500000	57599999	-1.037	-7.06433	ENSMUSG00000087964
chr2	57600000	57699999	-0.992037	-5.58591
chr2	57700000	57799999	-1.06868	-4.07195
chr2	57800000	57899999	-1.10575	-4.0143	ENSMUSG00000026828
chr2	59100000	59199999	1.02437	5.63638
chr2	59200000	59299999	1.32672	5.24849	ENSMUSG00000087455 ENSMUSG00000083276 ENSMUSG00000080982
chr2	59400000	59499999	1.60379	4.96987	ENSMUSG00000081157
chr2	64500000	64599999	-1.0438	-4.11349
chr2	65600000	65699999	-0.351817	-3.76032	ENSMUSG00000052865
chr2	65700000	65799999	-0.543609	-4.86795	ENSMUSG00000044647 ENSMUSG00000085160
chr2	65800000	65899999	-0.541291	-4.87425
chr2	65900000	65999999	-0.431686	-4.74946	ENSMUSG00000026994 ENSMUSG00000088306 ENSMUSG00000080728
chr2	66000000	66099999	-0.551442	-5.98464	ENSMUSG00000034848 ENSMUSG00000086671
chr2	66100000	66199999	-0.79183	-6.43598	ENSMUSG00000064329
chr2	66200000	66299999	-0.864995	-6.7208	ENSMUSG00000085386 ENSMUSG00000080855
chr2	67100000	67199999	-0.933677	-4.77846	ENSMUSG00000087043
chr2	67200000	67299999	-0.865033	-6.14064	ENSMUSG00000088043 ENSMUSG00000067582
chr2	67500000	67599999	-1.03278	-6.34223	ENSMUSG00000083910
chr2	67600000	67699999	-0.865892	-4.87792	ENSMUSG00000081299
chr2	67700000	67799999	-1.05814	-5.5338
chr2	67800000	67899999	-0.79878	-4.45333
chr2	67900000	67999999	-0.697443	-4.6432	ENSMUSG00000081257 ENSMUSG00000034780 ENSMUSG00000081899
chr2	68000000	68099999	-0.633153	-6.46994
chr2	68100000	68199999	-0.557151	-5.0267
chr2	68200000	68299999	-0.451093	-6.49344
chr2	74500000	74599999	0.997205	4.16286	ENSMUSG00000001819 ENSMUSG00000001823 ENSMUSG00000042499 ENSMUSG00000092315 ENSMUSG00000050368 ENSMUSG00000086077 ENSMUSG00000043342 ENSMUSG00000052371 ENSMUSG00000027102 ENSMUSG00000079277 ENSMUSG00000042464 ENSMUSG00000065500 ENSMUSG00000075277 ENSMUSG00000085015 ENSMUSG00000086559
chr2	74600000	74699999	0.679068	3.82284	ENSMUSG00000042448 ENSMUSG00000027099 ENSMUSG00000081156
chr2	77900000	77999999	-1.05341	-4.646	ENSMUSG00000085431
chr2	80600000	80699999	-0.36042	-4.1795	ENSMUSG00000064193 ENSMUSG00000065141
chr2	80700000	80799999	-0.87229	-4.85346	ENSMUSG00000084107 ENSMUSG00000084297 ENSMUSG00000081566
chr2	81000000	81099999	-1.19376	-5.02487
chr2	82700000	82799999	-1.08766	-3.95813
chr2	83000000	83099999	-1.11687	-6.36044
chr2	84300000	84399999	1.27456	3.79181	ENSMUSG00000087362
chr2	93600000	93699999	1.06221	4.61681	ENSMUSG00000081353 ENSMUSG00000040272
chr2	93700000	93799999	1.22399	6.10887	ENSMUSG00000075023 ENSMUSG00000078012 ENSMUSG00000083009 ENSMUSG00000087006 ENSMUSG00000075021
chr2	93800000	93899999	1.26768	4.35817	ENSMUSG00000027196 ENSMUSG00000040174
chr2	93900000	93999999	1.3083	4.13716	ENSMUSG00000027195
chr2	94200000	94299999	0.721328	4.07692	ENSMUSG00000081476 ENSMUSG00000045464 ENSMUSG00000027193
chr3	101300000	101399999	0.925381	5.15853	ENSMUSG00000033161
chr3	101400000	101499999	0.821025	5.16113
chr3	101500000	101599999	0.641964	5.14414
chr3	101600000	101699999	0.788381	4.98022	ENSMUSG00000044313 ENSMUSG00000033147
chr3	101700000	101799999	0.793858	4.0054
chr3	101800000	101899999	1.15431	5.7178	ENSMUSG00000048540
chr3	101900000	101999999	1.12377	6.76986	ENSMUSG00000027861 ENSMUSG00000027860
chr3	102000000	102099999	0.86471	6.63256	ENSMUSG00000089916
chr3	102100000	102199999	0.643647	4.25577
chr3	102500000	102599999	0.600088	6.72312	ENSMUSG00000086745 ENSMUSG00000027858 ENSMUSG00000027857
chr3	102700000	102799999	0.670575	4.9347	ENSMUSG00000048938 ENSMUSG00000065708
chr3	102800000	102899999	1.22957	6.72696	ENSMUSG00000027854 ENSMUSG00000068823 ENSMUSG00000027852 ENSMUSG00000070385 ENSMUSG00000089075
chr3	102900000	102999999	1.17096	4.79572	ENSMUSG00000007379 ENSMUSG00000005687
chr3	106500000	106599999	-1.12188	-4.55866	ENSMUSG00000056260 ENSMUSG00000040747
chr3	106600000	106699999	-1.05814	-3.7645	ENSMUSG00000043529
chr3	119300000	119399999	-1.01991	-3.76621	ENSMUSG00000087806
chr3	125800000	125899999	-0.933388	-4.68493	ENSMUSG00000087726
chr3	126500000	126599999	-0.352819	-4.81743
chr3	129900000	129999999	-0.750927	-4.01775	ENSMUSG00000065788
chr3	132500000	132599999	0.472674	3.7325	ENSMUSG00000040998
chr3	134100000	134199999	-1.10754	-3.81123
chr3	137300000	137399999	0.45315	4.27635	ENSMUSG00000064460
chr3	137400000	137499999	0.719897	6.0867
chr3	137500000	137599999	0.799677	4.68767	ENSMUSG00000037894 ENSMUSG00000074212 ENSMUSG00000081829 ENSMUSG00000088932 ENSMUSG00000091512
chr3	137600000	137699999	0.822534	7.12259	ENSMUSG00000028159
chr3	137700000	137799999	0.777336	7.54132	ENSMUSG00000049349 ENSMUSG00000090066 ENSMUSG00000028158
chr3	14800000	14899999	-0.0396571	4.26019	ENSMUSG00000027559 ENSMUSG00000027562
chr3	14900000	14999999	0.27231	5.46654
chr3	149100000	149199999	-0.783726	-4.24801
chr3	149200000	149299999	-0.8786	-6.36354
chr3	149300000	149399999	-0.922131	-5.95123
chr3	149400000	149499999	-1.01496	-4.87624
chr3	15100000	15199999	-0.00216242	5.93857
chr3	155700000	155799999	-1.12172	-5.69566
chr3	155800000	155899999	-1.11199	-5.41018
chr3	156300000	156399999	-1.13838	-4.4459
chr3	156400000	156499999	-1.06201	-4.05992	ENSMUSG00000083122
chr3	19900000	19999999	0.0687914	-6.25203	ENSMUSG00000027615 ENSMUSG00000078774 ENSMUSG00000002428
chr3	20000000	20099999	-0.0952047	-6.36412	ENSMUSG00000019528
chr3	22800000	22899999	-0.851251	-4.10684
chr3	22900000	22999999	-0.897831	-4.73489
chr3	23000000	23099999	-0.868981	-4.5645
chr3	23200000	23299999	-0.914813	-4.99227
chr3	23300000	23399999	-1.07667	-5.93792
chr3	25000000	25099999	-0.795259	-4.39683
chr3	25300000	25399999	-1.06132	-6.53785
chr3	25400000	25499999	-0.948572	-5.8238	ENSMUSG00000087945
chr3	25500000	25599999	-0.834201	-4.18596
chr3	25700000	25799999	-0.866145	-3.80118
chr3	25900000	25999999	-0.838401	-3.72903
chr3	26300000	26399999	-0.993062	-5.21647
chr3	26400000	26499999	-1.12142	-5.81829
chr3	26500000	26599999	-1.13648	-5.56522	ENSMUSG00000080368
chr3	26600000	26699999	-1.06771	-5.58269
chr3	28600000	28699999	-0.313481	-5.12677	ENSMUSG00000027690 ENSMUSG00000091329 ENSMUSG00000080638 ENSMUSG00000070522 ENSMUSG00000050192 ENSMUSG00000090783
chr3	29000000	29099999	-1.02764	-4.71868
chr3	29100000	29199999	-1.1544	-5.89819
chr3	29200000	29299999	-1.23731	-6.43673
chr3	31300000	31399999	-0.242836	-4.91457
chr3	32300000	32399999	1.21809	4.99778	ENSMUSG00000027665 ENSMUSG00000091091
chr3	33100000	33199999	-1.05225	-3.95315
chr3	38900000	38999999	-0.557958	-3.84246
chr3	39000000	39099999	-0.820791	-5.71744
chr3	39100000	39199999	-0.887075	-6.40832
chr3	40500000	40599999	0.214849	-3.77546	ENSMUSG00000069041 ENSMUSG00000025757
chr3	44600000	44699999	-1.15321	-3.78597
chr3	57100000	57199999	-0.15987	-4.73173	ENSMUSG00000088430
chr3	57200000	57299999	0.275737	-3.84067	ENSMUSG00000027801
chr3	57600000	57699999	0.149096	-4.50867	ENSMUSG00000027805
chr3	57700000	57799999	-0.131568	-5.17108	ENSMUSG00000088570
chr3	57900000	57999999	0.172087	-4.35996	ENSMUSG00000069008
chr3	58900000	58999999	-0.681391	-4.10045	ENSMUSG00000050075 ENSMUSG00000036381 ENSMUSG00000074590 ENSMUSG00000051431
chr3	60600000	60699999	-0.816912	-3.7635	ENSMUSG00000027694
chr3	60700000	60799999	-0.926971	-4.76859
chr3	60900000	60999999	-1.00792	-4.11132
chr3	63200000	63299999	-0.525589	-4.3254	ENSMUSG00000088957
chr3	63300000	63399999	-0.550009	-5.04353
chr3	63400000	63499999	-0.416946	-4.3562
chr3	63500000	63599999	-0.392152	-3.86205	ENSMUSG00000088360
chr3	65400000	65499999	1.02998	3.74522
chr3	68600000	68699999	0.607016	4.04262	ENSMUSG00000091272 ENSMUSG00000046999
chr3	68900000	68999999	0.925692	5.99872	ENSMUSG00000027782
chr3	69000000	69099999	0.70737	6.47925	ENSMUSG00000027783
chr3	69100000	69199999	0.332272	5.26514	ENSMUSG00000091315 ENSMUSG00000090941
chr3	69300000	69399999	0.233494	4.02158	ENSMUSG00000043300
chr3	75000000	75099999	-1.10838	-4.95609	ENSMUSG00000034139
chr3	91800000	91899999	-0.773026	-5.62817	ENSMUSG00000077085 ENSMUSG00000042244 ENSMUSG00000082826 ENSMUSG00000043165
chr3	9500000	9599999	0.674576	4.16415	ENSMUSG00000040209
chr3	9600000	9699999	0.827018	4.44539
chr3	98600000	98699999	-1.07647	-7.34254	ENSMUSG00000027869 ENSMUSG00000083222 ENSMUSG00000082185 ENSMUSG00000082089 ENSMUSG00000083577 ENSMUSG00000082589 ENSMUSG00000027871 ENSMUSG00000027870
chr3	98700000	98799999	-0.927551	-6.51846	ENSMUSG00000085121
chr3	98800000	98899999	-0.667987	-4.88407	ENSMUSG00000086833
chr4	103200000	103299999	-0.81821	-4.27379	ENSMUSG00000087482 ENSMUSG00000081584 ENSMUSG00000078617 ENSMUSG00000059195 ENSMUSG00000077514
chr4	103300000	103399999	-0.9186	-3.98857
chr4	103500000	103599999	-0.950059	-3.71445
chr4	12000000	12099999	-0.131692	-5.26759	ENSMUSG00000052137 ENSMUSG00000083246 ENSMUSG00000081593 ENSMUSG00000082676 ENSMUSG00000046667 ENSMUSG00000028218
chr4	12100000	12199999	-0.566015	-3.79916	ENSMUSG00000060989
chr4	12300000	12399999	-1.0402	-3.87951
chr4	138100000	138199999	0.969697	4.14829	ENSMUSG00000028753 ENSMUSG00000088589
chr4	138200000	138299999	1.02748	5.28914	ENSMUSG00000043621 ENSMUSG00000028750
chr4	138400000	138499999	1.13244	3.74178	ENSMUSG00000078518 ENSMUSG00000028751 ENSMUSG00000041161
chr4	139100000	139199999	1.34046	4.38098	ENSMUSG00000041025 ENSMUSG00000092637 ENSMUSG00000028737
chr4	142100000	142199999	-0.420728	-3.92418	ENSMUSG00000082201
chr4	142600000	142699999	0.236825	4.05005
chr4	142800000	142899999	0.428997	3.75123	ENSMUSG00000082575 ENSMUSG00000028583
chr4	14400000	14499999	-0.980471	-3.88355	ENSMUSG00000040569
chr4	14500000	14599999	-0.772614	-4.03661
chr4	150400000	150499999	1.17436	4.59786	ENSMUSG00000028955 ENSMUSG00000078491
chr4	150500000	150599999	0.954431	5.20533
chr4	150700000	150799999	0.508391	3.88816	ENSMUSG00000085593
chr4	153800000	153899999	0.580858	3.98492
chr4	153900000	153999999	0.576527	4.77634	ENSMUSG00000086565 ENSMUSG00000084987
chr4	154000000	154099999	0.624194	5.66034	ENSMUSG00000085069 ENSMUSG00000086810 ENSMUSG00000051276
chr4	154100000	154199999	0.770372	5.72357
chr4	15500000	15599999	-1.01072	-4.19886	ENSMUSG00000082673
chr4	15600000	15699999	-0.899627	-5.04082	ENSMUSG00000084181
chr4	15700000	15799999	-0.826856	-4.53516	ENSMUSG00000081026 ENSMUSG00000080470
chr4	15800000	15899999	-0.672635	-6.23535	ENSMUSG00000028222 ENSMUSG00000088055 ENSMUSG00000028223 ENSMUSG00000084190
chr4	16000000	16099999	-0.609873	-7.50944	ENSMUSG00000081679 ENSMUSG00000041135 ENSMUSG00000092822
chr4	22800000	22899999	-1.15493	-4.85602	ENSMUSG00000028244
chr4	23300000	23399999	-0.978354	-5.72452	ENSMUSG00000081997 ENSMUSG00000083727
chr4	23400000	23499999	-0.844739	-4.73972	ENSMUSG00000083785 ENSMUSG00000082876
chr4	23600000	23699999	-0.782643	-4.61986
chr4	23700000	23799999	-0.821736	-4.64217
chr4	23800000	23899999	-0.687542	-4.21989
chr4	23900000	23999999	-0.826645	-5.00064
chr4	24000000	24099999	-1.21511	-6.28186
chr4	27600000	27699999	-0.923816	-4.41111	ENSMUSG00000065209
chr4	27900000	27999999	-0.929142	-4.55886	ENSMUSG00000080175 ENSMUSG00000082977
chr4	28000000	28099999	-0.912574	-4.5116
chr4	28100000	28199999	-0.75312	-4.06523
chr4	28200000	28299999	-0.829329	-4.3961	ENSMUSG00000082703 ENSMUSG00000077521
chr4	28400000	28499999	-0.832721	-3.80309	ENSMUSG00000082359 ENSMUSG00000081579
chr4	40600000	40699999	1.207	3.99664	ENSMUSG00000081720 ENSMUSG00000028411 ENSMUSG00000082008 ENSMUSG00000091395 ENSMUSG00000028410 ENSMUSG00000065452 ENSMUSG00000028409
chr4	53900000	53999999	0.468063	4.06615	ENSMUSG00000077418
chr4	54900000	54999999	0.831028	4.27047
chr4	55000000	55099999	0.99718	4.53433	ENSMUSG00000060206
chr4	56500000	56599999	0.341376	8.00474
chr4	56600000	56699999	0.692743	8.53611	ENSMUSG00000077663
chr4	56900000	56999999	1.26075	3.73859	ENSMUSG00000055296 ENSMUSG00000065544 ENSMUSG00000077170 ENSMUSG00000064595 ENSMUSG00000092886 ENSMUSG00000045589
chr4	57200000	57299999	1.30075	6.34057	ENSMUSG00000038764
chr4	57300000	57399999	1.31836	6.68647	ENSMUSG00000085654 ENSMUSG00000087044 ENSMUSG00000078696
chr4	57400000	57499999	1.09996	5.6326	ENSMUSG00000081540 ENSMUSG00000081615
chr4	57600000	57699999	1.01352	4.17724
chr4	57700000	57799999	1.11375	4.42282	ENSMUSG00000073846 ENSMUSG00000089286
chr4	57800000	57899999	1.12012	4.06468	ENSMUSG00000038729 ENSMUSG00000064752
chr4	6100000	6199999	-0.624006	-4.21116	ENSMUSG00000028243 ENSMUSG00000080961 ENSMUSG00000028240
chr4	6200000	6299999	-0.664412	-5.66105	ENSMUSG00000085295
chr4	6300000	6399999	-0.385016	-4.36744	ENSMUSG00000028249 ENSMUSG00000028245 ENSMUSG00000058945
chr4	65500000	65599999	-1.11696	-3.76392
chr4	65700000	65799999	-1.16311	-3.86499
chr4	6600000	6699999	-1.08457	-7.92409	ENSMUSG00000086052
chr4	6700000	6799999	-0.996469	-5.64521
chr4	6800000	6899999	-1.11041	-4.09942
chr4	6900000	6999999	-0.948882	-4.71219	ENSMUSG00000083023
chr4	69800000	69899999	-0.656644	-4.86959
chr4	70000000	70099999	-0.220746	-3.99665	ENSMUSG00000088367
chr4	70100000	70199999	-0.157817	-4.7907	ENSMUSG00000039270
chr4	71900000	71999999	-1.13538	-5.53917
chr4	74000000	74099999	-0.65503	-4.02964
chr4	74500000	74599999	-1.0755	-4.41705
chr4	87700000	87799999	0.0872569	-3.77688	ENSMUSG00000070077 ENSMUSG00000082597
chr4	87800000	87899999	-0.32014	-4.6901
chr5	101400000	101499999	-0.57953	-3.76705
chr5	101500000	101599999	-0.774986	-4.53842
chr5	101600000	101699999	-0.753313	-4.68805
chr5	110900000	110999999	1.28485	5.56071	ENSMUSG00000048215
chr5	119000000	119099999	1.30106	4.7167
chr5	119300000	119399999	0.388789	6.00828
chr5	119400000	119499999	0.183705	6.22175
chr5	119700000	119799999	0.0752022	5.031	ENSMUSG00000084548
chr5	119800000	119899999	0.233432	4.12245
chr5	119900000	119999999	0.383607	3.74388
chr5	130200000	130299999	1.3421	8.81152	ENSMUSG00000034211 ENSMUSG00000029432 ENSMUSG00000086916 ENSMUSG00000029446 ENSMUSG00000065304
chr5	13100000	13199999	-0.536235	-4.12355	ENSMUSG00000062038
chr5	13200000	13299999	-0.415023	-4.48105
chr5	13300000	13399999	-0.508881	-4.66922
chr5	134200000	134299999	-0.23185	4.64029
chr5	137000000	137099999	1.50514	3.73624	ENSMUSG00000046548
chr5	138500000	138599999	0.74274	-3.81696	ENSMUSG00000079156 ENSMUSG00000029729 ENSMUSG00000037017 ENSMUSG00000037007
chr5	139400000	139499999	1.11786	4.4731	ENSMUSG00000025856 ENSMUSG00000090903 ENSMUSG00000075585
chr5	139500000	139599999	1.32114	4.6297	ENSMUSG00000025855
chr5	140500000	140599999	1.17108	4.62679	ENSMUSG00000085673 ENSMUSG00000087606
chr5	140600000	140699999	1.26269	4.10451	ENSMUSG00000087248
chr5	141600000	141699999	-0.461441	-4.21644
chr5	142500000	142599999	0.194368	4.74612
chr5	142600000	142699999	0.558144	6.47407
chr5	142900000	142999999	1.21767	8.40655	ENSMUSG00000056493 ENSMUSG00000039623 ENSMUSG00000029576
chr5	14300000	14399999	-0.703509	-3.81636
chr5	143000000	143099999	1.29657	6.19445	ENSMUSG00000074817 ENSMUSG00000039533
chr5	14400000	14499999	-0.812008	-4.4675
chr5	14500000	14599999	-0.984868	-5.49867
chr5	14600000	14699999	-0.91046	-4.94222
chr5	14700000	14799999	-1.0846	-5.29839
chr5	150400000	150499999	0.91757	4.01211	ENSMUSG00000029657 ENSMUSG00000080002
chr5	150500000	150599999	0.350599	4.11721	ENSMUSG00000051950
chr5	150600000	150699999	0.169835	4.08481
chr5	151700000	151799999	0.746702	3.87582	ENSMUSG00000087709 ENSMUSG00000058488
chr5	15500000	15599999	-0.810122	-4.99328	ENSMUSG00000091265
chr5	15600000	15699999	-0.855625	-4.37172
chr5	15700000	15799999	-0.977397	-4.16561
chr5	19200000	19299999	-0.838929	-4.31907
chr5	19300000	19399999	-0.860705	-4.94827
chr5	19400000	19499999	-1.01203	-5.77628
chr5	19500000	19599999	-0.998479	-6.28801	ENSMUSG00000064504
chr5	19800000	19899999	-0.672554	-3.84334
chr5	21300000	21399999	0.670004	4.12376	ENSMUSG00000028932 ENSMUSG00000029015 ENSMUSG00000090008
chr5	21400000	21499999	0.291088	4.04525	ENSMUSG00000073152 ENSMUSG00000090197
chr5	23800000	23899999	1.24223	4.05425	ENSMUSG00000038319 ENSMUSG00000086729 ENSMUSG00000028978 ENSMUSG00000086769 ENSMUSG00000038295
chr5	27900000	27999999	-0.215269	4.18002
chr5	28100000	28199999	0.0801264	3.77286	ENSMUSG00000039106 ENSMUSG00000091052
chr5	32400000	32499999	1.29872	3.82354	ENSMUSG00000073058 ENSMUSG00000029135 ENSMUSG00000065234
chr5	32700000	32799999	1.3471	4.31338	ENSMUSG00000014956 ENSMUSG00000080753
chr5	33600000	33699999	1.31881	4.76942	ENSMUSG00000037373 ENSMUSG00000092275 ENSMUSG00000079562
chr5	33700000	33799999	1.23218	4.01757	ENSMUSG00000037355 ENSMUSG00000029112
chr5	3400000	3499999	0.33819	-4.37957	ENSMUSG00000040274 ENSMUSG00000091644
chr5	36600000	36699999	0.890024	5.27428
chr5	36800000	36899999	1.52919	4.90006	ENSMUSG00000029198 ENSMUSG00000029196 ENSMUSG00000050677 ENSMUSG00000029192
chr5	39000000	39099999	0.587916	4.45305	ENSMUSG00000046572 ENSMUSG00000077273
chr5	4000000	4099999	0.221214	-3.71673	ENSMUSG00000040407 ENSMUSG00000001467
chr5	42000000	42099999	-0.567852	-4.71072	ENSMUSG00000029128
chr5	42100000	42199999	-0.36939	-3.77534	ENSMUSG00000049691
chr5	42200000	42299999	-0.66296	-4.42279	ENSMUSG00000061755
chr5	42300000	42399999	-0.854415	-3.80022
chr5	44900000	44999999	-0.784657	-4.32927
chr5	45000000	45099999	-0.783753	-4.57646
chr5	45100000	45199999	-0.582696	-4.62118
chr5	45200000	45299999	-0.614875	-5.09053
chr5	45300000	45399999	-0.924382	-6.56784	ENSMUSG00000062496 ENSMUSG00000067331
chr5	45400000	45499999	-0.96433	-6.78094
chr5	45500000	45599999	-0.880773	-6.4389	ENSMUSG00000029092
chr5	45600000	45699999	-0.558669	-4.1319
chr5	51800000	51899999	-0.944001	-4.18762
chr5	52000000	52099999	-1.15476	-3.71994
chr5	52200000	52299999	-0.979727	-4.34206
chr5	52300000	52399999	-0.861657	-4.57836
chr5	52400000	52499999	-0.334406	-3.85226
chr5	52600000	52699999	-0.0782188	-4.84368
chr5	52700000	52799999	-0.166966	-5.87643	ENSMUSG00000088981 ENSMUSG00000072941 ENSMUSG00000045790
chr5	52800000	52899999	-0.181414	-4.52053
chr5	54600000	54699999	-0.947022	-4.41541	ENSMUSG00000089535
chr5	54700000	54799999	-1.05239	-4.22251
chr5	54900000	54999999	-1.17743	-3.74656
chr5	63500000	63599999	-1.19651	-3.90165
chr5	64800000	64899999	1.30158	4.86324
chr5	64900000	64999999	1.29648	5.61818
chr5	65000000	65099999	1.21303	5.16331	ENSMUSG00000093029
chr5	65100000	65199999	1.16149	4.13565
chr5	72100000	72199999	-1.29975	-4.32458
chr5	73700000	73799999	1.34291	3.88069	ENSMUSG00000029153
chr5	73900000	73999999	0.933684	8.20712	ENSMUSG00000051674
chr5	74000000	74099999	0.610138	6.69033	ENSMUSG00000067206 ENSMUSG00000029156 ENSMUSG00000029155
chr5	75200000	75299999	0.703413	3.95642
chr5	75300000	75399999	0.909145	4.24246	ENSMUSG00000072874
chr5	75500000	75599999	0.705182	3.75568	ENSMUSG00000029231
chr5	75600000	75699999	0.164511	5.7831
chr5	82100000	82199999	-0.591299	-4.40347	ENSMUSG00000077914
chr5	82200000	82299999	-0.882317	-5.88485	ENSMUSG00000087431
chr5	82300000	82399999	-0.872215	-5.53303
chr5	82400000	82499999	-0.792943	-4.63589
chr5	86000000	86099999	-1.28275	-3.84718
chr5	87100000	87199999	-0.657247	-4.32046	ENSMUSG00000054537 ENSMUSG00000089851
chr5	9300000	9399999	-0.875735	-4.32168	ENSMUSG00000086115 ENSMUSG00000077896
chr5	9400000	9499999	-1.06397	-4.568
chr5	96600000	96699999	-0.207943	-3.90002	ENSMUSG00000029486
chr5	96900000	96999999	-0.612124	-3.92749
chr5	97300000	97399999	0.272104	-4.10773	ENSMUSG00000064550
chr5	97900000	97999999	-1.00876	-4.42186	ENSMUSG00000085273
chr5	98000000	98099999	-1.01332	-4.3039
chr6	100000000	100099999	1.12226	5.35137
chr6	100100000	100199999	1.4055	6.1773
chr6	100200000	100299999	1.35067	6.25494	ENSMUSG00000072872
chr6	100400000	100499999	1.19155	4.35809	ENSMUSG00000087929
chr6	117600000	117699999	0.378821	4.10483	ENSMUSG00000072829
chr6	117700000	117799999	0.951867	5.02891	ENSMUSG00000071237 ENSMUSG00000059689
chr6	118200000	118299999	0.432342	4.22968
chr6	118500000	118599999	0.469262	-4.61085
chr6	120300000	120399999	1.41129	5.04019	ENSMUSG00000030180 ENSMUSG00000084454
chr6	129400000	129499999	-0.779363	-3.86916	ENSMUSG00000079293 ENSMUSG00000030162 ENSMUSG00000030160 ENSMUSG00000091870 ENSMUSG00000030161
chr6	13300000	13399999	-1.03026	-6.60974
chr6	139500000	139599999	-1.07475	-4.20645
chr6	139800000	139899999	-1.03933	-4.00961
chr6	139900000	139999999	-0.946166	-4.64024	ENSMUSG00000030230 ENSMUSG00000041791
chr6	142800000	142899999	0.714475	6.37137	ENSMUSG00000030283
chr6	143000000	143099999	0.891582	5.66813	ENSMUSG00000030279 ENSMUSG00000093369
chr6	143100000	143199999	0.927973	6.10421	ENSMUSG00000030275
chr6	148500000	148599999	0.324474	4.50793	ENSMUSG00000070995 ENSMUSG00000065269
chr6	21200000	21299999	-0.995976	-3.96121
chr6	21300000	21399999	-0.973379	-4.05253
chr6	21400000	21499999	-0.90498	-4.41679
chr6	21500000	21599999	-1.03817	-6.08852
chr6	21600000	21699999	-0.959662	-5.97782
chr6	21700000	21799999	-0.769731	-4.00109	ENSMUSG00000029669
chr6	22600000	22699999	-0.787061	-4.69258
chr6	22700000	22799999	-0.545039	-3.92882	ENSMUSG00000077877 ENSMUSG00000077134
chr6	22900000	22999999	-0.493381	-3.9796	ENSMUSG00000068748
chr6	23500000	23599999	-0.984776	-7.04192	ENSMUSG00000088885 ENSMUSG00000051956
chr6	23600000	23699999	-1.11753	-7.40222	ENSMUSG00000078179
chr6	23700000	23799999	-1.12579	-6.20148
chr6	24500000	24599999	-0.720456	-3.77243	ENSMUSG00000029685 ENSMUSG00000091097 ENSMUSG00000029683 ENSMUSG00000029684
chr6	24600000	24699999	-0.8758	-5.11645	ENSMUSG00000029679
chr6	24800000	24899999	-1.17271	-5.14754	ENSMUSG00000029678 ENSMUSG00000077196
chr6	25600000	25699999	-0.955362	-3.77574	ENSMUSG00000039904
chr6	26000000	26099999	-1.01008	-4.42161
chr6	26100000	26199999	-0.982403	-4.41366
chr6	26200000	26299999	-0.877625	-4.03838
chr6	27700000	27799999	-1.11014	-3.80005
chr6	33800000	33899999	0.70437	4.42415
chr6	33900000	33999999	0.842515	4.00644	ENSMUSG00000087441
chr6	34100000	34199999	1.15795	4.57556	ENSMUSG00000087356 ENSMUSG00000018999 ENSMUSG00000087613
chr6	38800000	38899999	1.52937	5.38456
chr6	3900000	3999999	-0.813402	-4.67098	ENSMUSG00000029664 ENSMUSG00000029663 ENSMUSG00000032766
chr6	39100000	39199999	1.64688	4.69218	ENSMUSG00000042599
chr6	4000000	4099999	-0.710347	-4.02034	ENSMUSG00000032757
chr6	40100000	40199999	-0.510896	-3.83391	ENSMUSG00000057716
chr6	40200000	40299999	-0.547915	-4.45916
chr6	40300000	40399999	-0.42717	-4.28601	ENSMUSG00000029916 ENSMUSG00000037172
chr6	40400000	40499999	-0.616014	-4.76617	ENSMUSG00000037159 ENSMUSG00000029911 ENSMUSG00000052850 ENSMUSG00000037140 ENSMUSG00000029909 ENSMUSG00000068259
chr6	40500000	40599999	-0.869285	-4.02885	ENSMUSG00000045514 ENSMUSG00000029915 ENSMUSG00000058250
chr6	40700000	40799999	-1.37744	-5.08844
chr6	41700000	41799999	-0.997893	-4.49558	ENSMUSG00000045479 ENSMUSG00000058499
chr6	42100000	42199999	-0.41995	-5.39392	ENSMUSG00000051917 ENSMUSG00000029864
chr6	42700000	42799999	-0.937885	-3.85425	ENSMUSG00000061091 ENSMUSG00000065034 ENSMUSG00000057108 ENSMUSG00000054431 ENSMUSG00000087766 ENSMUSG00000049168
chr6	42800000	42899999	-1.02164	-4.53474	ENSMUSG00000043119 ENSMUSG00000045708 ENSMUSG00000073111
chr6	4800000	4899999	0.62639	4.06253	ENSMUSG00000083041
chr6	49700000	49799999	-0.615798	-4.98813	ENSMUSG00000029819
chr6	49900000	49999999	-0.448389	-5.08179
chr6	50000000	50099999	-0.404907	-5.97955
chr6	50100000	50199999	-0.0908157	-5.1237	ENSMUSG00000038388 ENSMUSG00000029821
chr6	5100000	5199999	0.581866	4.33935	ENSMUSG00000002588 ENSMUSG00000029759
chr6	51500000	51599999	1.13614	5.21232	ENSMUSG00000038301 ENSMUSG00000092936
chr6	51600000	51699999	1.00879	5.13513
chr6	51700000	51799999	1.10853	6.38339
chr6	51800000	51899999	1.17683	6.56941	ENSMUSG00000059182
chr6	51900000	51999999	1.55789	7.63674
chr6	5200000	5299999	0.527036	4.16608	ENSMUSG00000032667
chr6	52100000	52199999	1.48933	3.74941	ENSMUSG00000029844 ENSMUSG00000087658 ENSMUSG00000014704 ENSMUSG00000059723 ENSMUSG00000056445 ENSMUSG00000079560 ENSMUSG00000087626 ENSMUSG00000085696 ENSMUSG00000056468 ENSMUSG00000000942 ENSMUSG00000038253 ENSMUSG00000043219 ENSMUSG00000038236 ENSMUSG00000038227 ENSMUSG00000092475 ENSMUSG00000056583 ENSMUSG00000065443 ENSMUSG00000000938 ENSMUSG00000038210 ENSMUSG00000086427
chr6	5300000	5399999	0.654238	4.32366	ENSMUSG00000042607
chr6	53100000	53199999	0.229818	-4.06181
chr6	53200000	53299999	0.126845	-3.9305
chr6	5400000	5499999	0.383988	3.75511	ENSMUSG00000019577
chr6	55700000	55799999	-0.823709	-3.70977
chr6	55800000	55899999	-0.771073	-4.06464	ENSMUSG00000037973
chr6	55900000	55999999	-0.591608	-4.10892	ENSMUSG00000002930
chr6	56000000	56099999	-0.864588	-5.96948
chr6	56100000	56199999	-1.10922	-5.81471
chr6	57700000	57799999	-0.810551	-6.40566	ENSMUSG00000037788 ENSMUSG00000058588
chr6	58800000	58899999	-0.454866	-6.00435	ENSMUSG00000029804 ENSMUSG00000055430
chr6	58900000	58999999	-0.769629	-7.42356	ENSMUSG00000037709 ENSMUSG00000092323
chr6	59000000	59099999	-0.91726	-8.83888	ENSMUSG00000077352
chr6	59200000	59299999	-0.85586	-4.01823
chr6	60600000	60699999	-0.561424	-3.87279
chr6	60700000	60799999	-0.895745	-5.85019	ENSMUSG00000025889 ENSMUSG00000064018
chr6	61300000	61399999	-0.91942	-4.26916
chr6	61500000	61599999	-1.09243	-4.24235
chr6	61700000	61799999	-1.01781	-4.811
chr6	61800000	61899999	-0.928307	-4.05548
chr6	62200000	62299999	-0.910582	-4.3444
chr6	62800000	62899999	-0.76967	-4.79035
chr6	63200000	63299999	-0.73834	-4.03057
chr6	63300000	63399999	-0.667399	-3.94716
chr6	63400000	63499999	-0.644376	-4.04579
chr6	63500000	63599999	-0.633121	-3.83304
chr6	63700000	63799999	-0.738056	-4.21487
chr6	64000000	64099999	-0.965587	-4.44809
chr6	64100000	64199999	-0.88158	-4.32923
chr6	64200000	64299999	-0.942848	-4.90579
chr6	64300000	64399999	-0.952734	-4.3896	ENSMUSG00000064775
chr6	71300000	71399999	0.916254	4.64064	ENSMUSG00000053977 ENSMUSG00000002222
chr6	71500000	71599999	1.1125	5.56302	ENSMUSG00000053119 ENSMUSG00000053470
chr6	71600000	71699999	0.976089	4.08394
chr6	73200000	73299999	0.486947	6.70863	ENSMUSG00000052738
chr6	75400000	75499999	-1.11283	-3.82206
chr6	80100000	80199999	-0.936509	-4.51212
chr6	80400000	80499999	-0.935797	-5.37607
chr6	80500000	80599999	-0.875417	-4.8025
chr6	80700000	80799999	-0.97839	-5.07842	ENSMUSG00000089503
chr6	80800000	80899999	-0.925972	-5.00786
chr6	80900000	80999999	-0.907712	-5.14439
chr6	8100000	8199999	-0.198557	-3.95252	ENSMUSG00000042447
chr6	81000000	81099999	-0.947115	-5.32098
chr6	81100000	81199999	-0.873708	-4.08571
chr6	81200000	81299999	-0.959116	-4.06357
chr6	8200000	8299999	-0.296477	-5.9005	ENSMUSG00000012483
chr6	8300000	8399999	-0.283871	-4.86882	ENSMUSG00000089890 ENSMUSG00000089735 ENSMUSG00000090151 ENSMUSG00000088118
chr6	84100000	84199999	0.965072	5.79539
chr6	84200000	84299999	0.780892	6.4143
chr6	84300000	84399999	0.64157	6.93675
chr6	84400000	84499999	0.57364	6.66862
chr6	84500000	84599999	0.606701	5.38799	ENSMUSG00000063415
chr6	84600000	84699999	0.464444	4.85918
chr6	8500000	8599999	-0.324803	-4.34405	ENSMUSG00000029638 ENSMUSG00000090407 ENSMUSG00000090234
chr6	8600000	8699999	-0.42366	-4.43531	ENSMUSG00000062995
chr6	8700000	8799999	-0.565902	-4.33899
chr6	8800000	8899999	-0.756405	-4.23363
chr6	88300000	88399999	1.39405	4.61391	ENSMUSG00000033216 ENSMUSG00000084582
chr6	88500000	88599999	1.1787	4.99115	ENSMUSG00000033182
chr6	88600000	88699999	1.14497	3.99158	ENSMUSG00000085291
chr6	88700000	88799999	1.116	3.76645	ENSMUSG00000033174 ENSMUSG00000030083 ENSMUSG00000085828
chr6	88800000	88899999	1.14108	4.32333	ENSMUSG00000033152 ENSMUSG00000002870 ENSMUSG00000002871
chr6	88900000	88999999	0.929744	5.10819
chr6	89000000	89099999	0.855477	4.97672	ENSMUSG00000055403 ENSMUSG00000072917 ENSMUSG00000090254
chr6	89200000	89299999	0.802836	4.00173	ENSMUSG00000085988 ENSMUSG00000030084
chr6	97400000	97499999	0.675986	4.41789	ENSMUSG00000064724
chr6	97500000	97599999	0.48339	4.93072	ENSMUSG00000065017
chr6	97600000	97699999	0.456869	6.06189	ENSMUSG00000064571
chr6	97700000	97799999	0.554674	4.4582	ENSMUSG00000089464
chr7	103000000	103099999	-0.212395	4.75196
chr7	103100000	103199999	0.0360581	3.97909	ENSMUSG00000055099
chr7	106100000	106199999	1.40515	3.90801
chr7	108800000	108899999	1.4376	4.21407	ENSMUSG00000001829
chr7	109800000	109899999	-0.245392	4.36637	ENSMUSG00000073970 ENSMUSG00000073969 ENSMUSG00000073968 ENSMUSG00000073967 ENSMUSG00000070423 ENSMUSG00000066273 ENSMUSG00000066272 ENSMUSG00000088888 ENSMUSG00000043366
chr7	112200000	112299999	-1.28807	-6.33478	ENSMUSG00000073914 ENSMUSG00000073913 ENSMUSG00000073912 ENSMUSG00000041885 ENSMUSG00000073911 ENSMUSG00000059768 ENSMUSG00000044120
chr7	112300000	112399999	-1.16234	-6.00074	ENSMUSG00000047225 ENSMUSG00000047794 ENSMUSG00000048425
chr7	112400000	112499999	-0.80445	-5.4172	ENSMUSG00000073908 ENSMUSG00000073909 ENSMUSG00000073907 ENSMUSG00000050266 ENSMUSG00000043948
chr7	112500000	112599999	-0.309487	-4.06424	ENSMUSG00000073906 ENSMUSG00000078611 ENSMUSG00000044465 ENSMUSG00000030897 ENSMUSG00000030898
chr7	112600000	112699999	0.0712935	-5.82462	ENSMUSG00000037060
chr7	112700000	112799999	0.364972	-5.06809	ENSMUSG00000037049 ENSMUSG00000037032 ENSMUSG00000030895 ENSMUSG00000036989 ENSMUSG00000030881 ENSMUSG00000089847 ENSMUSG00000064897
chr7	112800000	112899999	0.0896269	-6.54272	ENSMUSG00000030882 ENSMUSG00000081911 ENSMUSG00000030888 ENSMUSG00000030890 ENSMUSG00000043866 ENSMUSG00000030894
chr7	112900000	112999999	0.194441	-4.58071	ENSMUSG00000036862 ENSMUSG00000086414 ENSMUSG00000030879 ENSMUSG00000086513
chr7	116200000	116299999	-0.21052	-5.22849	ENSMUSG00000048330 ENSMUSG00000064747 ENSMUSG00000036111
chr7	116300000	116399999	0.0613167	-3.81932
chr7	119500000	119599999	1.32191	4.53391	ENSMUSG00000030771
chr7	119600000	119699999	1.34486	4.13651	ENSMUSG00000030770 ENSMUSG00000085049
chr7	119800000	119899999	1.61897	4.48997
chr7	119900000	119999999	1.2466	3.85288
chr7	120000000	120099999	1.16108	4.31773	ENSMUSG00000055593 ENSMUSG00000048962
chr7	120100000	120199999	1.10956	5.00904
chr7	120200000	120299999	1.35091	5.81292	ENSMUSG00000088671
chr7	120400000	120499999	0.871214	5.24078	ENSMUSG00000055116 ENSMUSG00000038187 ENSMUSG00000082183
chr7	120500000	120599999	0.65817	5.13244	ENSMUSG00000059077 ENSMUSG00000050459
chr7	120600000	120699999	0.520746	5.07891	ENSMUSG00000030759 ENSMUSG00000084984
chr7	120700000	120799999	0.463763	4.9111
chr7	121800000	121899999	0.0259257	3.8924	ENSMUSG00000086583 ENSMUSG00000030666
chr7	121900000	121999999	0.020571	6.30042	ENSMUSG00000048782 ENSMUSG00000077644
chr7	122000000	122099999	-0.165159	4.7232	ENSMUSG00000046411 ENSMUSG00000089348
chr7	125200000	125299999	0.632738	4.69479	ENSMUSG00000008683 ENSMUSG00000030654 ENSMUSG00000065874
chr7	127200000	127299999	-0.441311	-5.78227	ENSMUSG00000030917 ENSMUSG00000030911
chr7	128600000	128699999	-0.70425	-4.08038
chr7	131500000	131599999	-1.2622	-4.78301
chr7	132900000	132999999	0.695367	4.02086	ENSMUSG00000032743
chr7	133000000	133099999	0.862102	6.23482
chr7	133100000	133199999	1.1191	6.0477
chr7	137700000	137799999	1.50682	6.82141
chr7	137800000	137899999	1.26136	6.35738	ENSMUSG00000030852
chr7	137900000	137999999	1.37749	7.75225	ENSMUSG00000050189 ENSMUSG00000040298 ENSMUSG00000093098
chr7	13800000	13899999	0.289165	-4.30119	ENSMUSG00000050453 ENSMUSG00000092427 ENSMUSG00000070814 ENSMUSG00000056394
chr7	138000000	138099999	1.3654	8.69303	ENSMUSG00000086108 ENSMUSG00000040268
chr7	138100000	138199999	0.94391	6.18018	ENSMUSG00000006205
chr7	138300000	138399999	0.220549	4.56414	ENSMUSG00000006204
chr7	13900000	13999999	-0.336626	-5.92201	ENSMUSG00000033847 ENSMUSG00000074547 ENSMUSG00000087915 ENSMUSG00000088361 ENSMUSG00000005649
chr7	140400000	140499999	0.732807	4.00652
chr7	140600000	140699999	0.618175	6.20578
chr7	140700000	140799999	0.763706	5.63481	ENSMUSG00000030976
chr7	140800000	140899999	0.969689	8.01962	ENSMUSG00000039990 ENSMUSG00000030981 ENSMUSG00000030979
chr7	140900000	140999999	0.801325	7.3245	ENSMUSG00000030983 ENSMUSG00000030986 ENSMUSG00000081431
chr7	141000000	141099999	0.696823	6.55163	ENSMUSG00000053111
chr7	142400000	142499999	-0.0766756	4.90969	ENSMUSG00000073804
chr7	142500000	142599999	0.080432	5.22547	ENSMUSG00000073803
chr7	142600000	142699999	0.18118	4.74071	ENSMUSG00000048377
chr7	143400000	143499999	-0.167547	3.86072
chr7	143700000	143799999	-0.255673	3.90927	ENSMUSG00000087869
chr7	143800000	143899999	-0.202507	4.09697
chr7	144000000	144099999	-0.0332151	3.99313
chr7	144100000	144199999	-0.234466	3.96192
chr7	144200000	144299999	-0.253344	4.60376
chr7	144400000	144499999	0.419589	5.64743	ENSMUSG00000010476
chr7	144500000	144599999	0.611597	5.64268	ENSMUSG00000040139
chr7	144600000	144699999	0.527807	5.31735	ENSMUSG00000031068
chr7	144700000	144799999	-0.0267891	5.52552
chr7	144800000	144899999	-0.444338	5.0275
chr7	146300000	146399999	1.03515	3.85757	ENSMUSG00000015981
chr7	146700000	146799999	0.815386	5.19123	ENSMUSG00000041309 ENSMUSG00000070357
chr7	150100000	150199999	1.01633	5.7392	ENSMUSG00000009248 ENSMUSG00000052281 ENSMUSG00000000244
chr7	150200000	150299999	1.05778	5.89394	ENSMUSG00000059277 ENSMUSG00000037706 ENSMUSG00000009246 ENSMUSG00000045752
chr7	150300000	150399999	0.774355	3.90832
chr7	35400000	35499999	0.874023	3.77434	ENSMUSG00000030499 ENSMUSG00000085923 ENSMUSG00000087127
chr7	36300000	36399999	1.01831	3.85323	ENSMUSG00000034875 ENSMUSG00000056043 ENSMUSG00000034867
chr7	36500000	36599999	0.823537	6.48339	ENSMUSG00000043671 ENSMUSG00000044452 ENSMUSG00000084801 ENSMUSG00000044997
chr7	36600000	36699999	0.435501	5.02887
chr7	36700000	36799999	-0.225077	4.16525
chr7	36800000	36899999	-0.513637	4.52109
chr7	38100000	38199999	-0.151275	4.39723
chr7	38200000	38299999	-0.133072	4.13809
chr7	38300000	38399999	-0.08349	4.38423
chr7	38400000	38499999	-0.0215505	4.09121
chr7	38500000	38599999	0.325286	5.28554
chr7	38600000	38699999	0.461558	5.03521	ENSMUSG00000064591
chr7	38700000	38799999	0.792367	5.76783	ENSMUSG00000030421
chr7	38800000	38899999	0.918682	5.87508	ENSMUSG00000002068
chr7	38900000	38999999	0.76008	4.42468	ENSMUSG00000089230 ENSMUSG00000054676
chr7	53800000	53899999	1.36123	5.93023	ENSMUSG00000087492
chr7	54000000	54099999	1.37737	4.7436	ENSMUSG00000057465 ENSMUSG00000014418 ENSMUSG00000006599 ENSMUSG00000087298 ENSMUSG00000090468
chr7	54200000	54299999	1.41	6.12647	ENSMUSG00000056509 ENSMUSG00000049516
chr7	54300000	54399999	1.056	4.59575	ENSMUSG00000010307 ENSMUSG00000030854 ENSMUSG00000085186
chr7	56100000	56199999	0.793317	3.74764	ENSMUSG00000046179 ENSMUSG00000085995
chr7	57100000	57199999	0.878881	4.41245	ENSMUSG00000091622 ENSMUSG00000039728
chr7	57200000	57299999	0.234664	4.99874
chr7	63400000	63499999	0.248224	4.10719
chr7	63500000	63599999	-0.208088	3.96713
chr7	6600000	6699999	0.0476066	4.07296	ENSMUSG00000002266 ENSMUSG00000002265
chr7	72800000	72899999	0.744893	4.93831	ENSMUSG00000030515 ENSMUSG00000078681 ENSMUSG00000076292
chr7	74000000	74099999	0.0539024	4.13669
chr7	75900000	75999999	-0.81103	4.10842
chr7	76300000	76399999	-0.869109	3.86378
chr7	80200000	80299999	0.566611	4.05549
chr7	86800000	86899999	1.31004	4.22561	ENSMUSG00000046591 ENSMUSG00000050382 ENSMUSG00000039133 ENSMUSG00000030546 ENSMUSG00000030545
chr7	91800000	91899999	-0.174485	-5.38256	ENSMUSG00000085236
chr7	97100000	97199999	1.46612	4.08427	ENSMUSG00000030619
chr7	98100000	98199999	-1.01992	-3.75118
chr7	98300000	98399999	-1.01034	-4.01267	ENSMUSG00000089271
chr8	106700000	106799999	0.353074	-4.57268	ENSMUSG00000031872 ENSMUSG00000074128 ENSMUSG00000035824 ENSMUSG00000054400
chr8	106800000	106899999	0.601428	-3.79805	ENSMUSG00000074127 ENSMUSG00000031876 ENSMUSG00000078953 ENSMUSG00000035785 ENSMUSG00000031875 ENSMUSG00000051554 ENSMUSG00000051578
chr8	106900000	106999999	0.875425	-4.33428	ENSMUSG00000035770
chr8	107000000	107099999	0.627604	-4.52001	ENSMUSG00000052616 ENSMUSG00000077633 ENSMUSG00000031878 ENSMUSG00000031883
chr8	10900000	10999999	0.713159	4.02488	ENSMUSG00000038917 ENSMUSG00000038894
chr8	110100000	110199999	1.14522	3.79472	ENSMUSG00000039067 ENSMUSG00000080445
chr8	110200000	110299999	0.753495	4.02262
chr8	110300000	110399999	0.44717	4.96881	ENSMUSG00000092895 ENSMUSG00000093318
chr8	110400000	110499999	0.0569075	5.57007
chr8	11800000	11899999	0.84575	4.36676	ENSMUSG00000086500 ENSMUSG00000031512
chr8	118900000	118999999	-0.396288	3.80238	ENSMUSG00000087787
chr8	11900000	11999999	0.530469	8.1751
chr8	12000000	12099999	0.425886	6.79459
chr8	12300000	12399999	0.693519	6.21382	ENSMUSG00000089234 ENSMUSG00000092656
chr8	123500000	123599999	0.638428	3.89314	ENSMUSG00000087156
chr8	123600000	123699999	0.932337	4.95874	ENSMUSG00000042812 ENSMUSG00000031816 ENSMUSG00000046714 ENSMUSG00000043867
chr8	12400000	12499999	0.878628	6.56033	ENSMUSG00000047935
chr8	124100000	124199999	1.38538	4.12339	ENSMUSG00000031812 ENSMUSG00000061410 ENSMUSG00000064642 ENSMUSG00000092836
chr8	127300000	127399999	1.24065	8.49539	ENSMUSG00000036913 ENSMUSG00000090118 ENSMUSG00000031984
chr8	27400000	27499999	0.169048	5.03477
chr8	29600000	29699999	-0.89094	-4.18864
chr8	30000000	30099999	-1.14786	-4.45108
chr8	30100000	30199999	-1.06287	-4.22633
chr8	30200000	30299999	-1.18391	-5.27279
chr8	30300000	30399999	-1.23127	-5.89665
chr8	36400000	36499999	0.0948996	-4.50735	ENSMUSG00000046794
chr8	36500000	36599999	0.142839	-4.13103	ENSMUSG00000031527
chr8	36600000	36699999	-0.0961744	-5.03176	ENSMUSG00000087118 ENSMUSG00000070056
chr8	36700000	36799999	-0.140752	-4.87033
chr8	42100000	42199999	1.09796	3.86089	ENSMUSG00000045636 ENSMUSG00000084960 ENSMUSG00000086773 ENSMUSG00000085672
chr8	42500000	42599999	0.112502	3.98648
chr8	42600000	42699999	-0.320499	4.56111
chr8	43700000	43799999	-1.14444	-3.93729
chr8	43800000	43899999	-0.981167	-3.74253	ENSMUSG00000088312
chr8	49500000	49599999	-0.632879	-4.28956
chr8	49700000	49799999	-0.695736	-4.91357
chr8	49800000	49899999	-0.552166	-4.6559
chr8	49900000	49999999	-0.515261	-4.78112
chr8	50000000	50099999	-0.653454	-5.19409	ENSMUSG00000089548
chr8	50100000	50199999	-0.949076	-6.75946
chr8	50200000	50299999	-0.99185	-5.91736
chr8	50300000	50399999	-0.882916	-4.36778
chr8	58900000	58999999	-0.866755	-4.91706
chr8	59000000	59099999	-0.810393	-3.78611	ENSMUSG00000077585 ENSMUSG00000038215 ENSMUSG00000038206 ENSMUSG00000076392
chr8	59100000	59199999	-1.02545	-4.68922
chr8	65900000	65999999	-1.04648	-3.78977
chr8	68100000	68199999	-1.20251	-4.86074	ENSMUSG00000064763
chr8	68700000	68799999	-1.11494	-4.19616
chr8	68800000	68899999	-1.09305	-3.93925
chr8	80500000	80599999	0.517499	3.8655
chr8	80600000	80699999	0.654607	5.50005
chr8	80700000	80799999	0.50459	4.75996
chr8	80800000	80899999	0.510589	4.52696	ENSMUSG00000037101
chr8	81000000	81099999	0.718701	5.00585	ENSMUSG00000037070
chr8	81100000	81199999	0.484755	3.74864
chr8	82200000	82299999	0.414641	3.77119	ENSMUSG00000058355 ENSMUSG00000036977
chr8	83300000	83399999	0.951058	4.00129	ENSMUSG00000031714
chr8	89200000	89299999	1.28635	5.61032	ENSMUSG00000036840 ENSMUSG00000074178
chr8	89500000	89599999	0.501436	4.60128	ENSMUSG00000066362
chr8	89600000	89699999	0.263404	5.53745
chr8	89700000	89799999	0.0543683	4.19773
chr8	89800000	89899999	-0.0828049	3.76686
chr8	91100000	91199999	0.829837	5.05176	ENSMUSG00000031662 ENSMUSG00000055994
chr8	91200000	91299999	0.837782	5.91832	ENSMUSG00000036712
chr8	91300000	91399999	0.728349	5.43458	ENSMUSG00000056772
chr8	91400000	91499999	0.799056	5.93575
chr8	91500000	91599999	0.838035	4.96217	ENSMUSG00000031665
chr8	91600000	91699999	0.491477	3.98635
chr8	91700000	91799999	0.495408	3.85517	ENSMUSG00000069962
chr8	93300000	93399999	0.975369	4.31211
chr8	93600000	93699999	1.06519	4.51162	ENSMUSG00000031666 ENSMUSG00000031667
chr8	93700000	93799999	0.976388	4.90111	ENSMUSG00000089148 ENSMUSG00000033282
chr8	93800000	93899999	0.796562	4.81778
chr8	94100000	94199999	0.427263	4.34278	ENSMUSG00000090778
chr8	94200000	94299999	0.555454	6.16183
chr8	94300000	94399999	0.439908	6.61512	ENSMUSG00000031734 ENSMUSG00000046413
chr8	94400000	94499999	0.391247	6.15875
chr8	94500000	94599999	0.420503	6.29577	ENSMUSG00000065636
chr8	94600000	94699999	0.338929	5.64234
chr8	94700000	94799999	0.291937	6.16268
chr8	94800000	94899999	0.22207	4.59852	ENSMUSG00000031736 ENSMUSG00000031737
chr8	94900000	94999999	-0.0336948	4.79247
chr8	95000000	95099999	-0.224138	4.2571
chr8	95100000	95199999	-0.12506	4.13704
chr8	95200000	95299999	0.0494847	4.87901	ENSMUSG00000031738 ENSMUSG00000078967
chr9	102900000	102999999	1.15017	4.3948	ENSMUSG00000032548 ENSMUSG00000065466 ENSMUSG00000077438
chr9	103000000	103099999	1.33289	5.45543	ENSMUSG00000032549 ENSMUSG00000032553
chr9	103100000	103199999	1.14494	4.94274	ENSMUSG00000090639 ENSMUSG00000032554 ENSMUSG00000033688
chr9	103200000	103299999	1.00647	3.8766	ENSMUSG00000032555 ENSMUSG00000032803
chr9	104700000	104799999	-1.20743	-4.21967
chr9	115200000	115299999	0.606085	4.13511	ENSMUSG00000080409 ENSMUSG00000080495 ENSMUSG00000080636
chr9	119300000	119399999	1.2394	4.58674	ENSMUSG00000061393 ENSMUSG00000086780 ENSMUSG00000042787
chr9	119400000	119499999	1.0505	4.2995	ENSMUSG00000032511
chr9	120800000	120899999	1.19568	6.8576	ENSMUSG00000086365 ENSMUSG00000006932
chr9	12800000	12899999	-1.11612	-5.35598
chr9	12900000	12999999	-0.928006	-5.19274
chr9	14800000	14899999	0.58854	3.78326	ENSMUSG00000031934 ENSMUSG00000031936
chr9	15600000	15699999	-0.632684	-4.24837	ENSMUSG00000050901
chr9	24900000	24999999	-0.0806194	-3.93479	ENSMUSG00000066809 ENSMUSG00000008429
chr9	25200000	25299999	-0.583816	-6.79406
chr9	25300000	25399999	-0.636394	-5.47535	ENSMUSG00000036611 ENSMUSG00000088876 ENSMUSG00000077697
chr9	26400000	26499999	-1.14943	-4.40311
chr9	29800000	29899999	-0.866809	-3.87672
chr9	29900000	29999999	-1.00164	-4.0106
chr9	30000000	30099999	-0.764845	-4.13985	ENSMUSG00000064713
chr9	31700000	31799999	1.03222	4.11026	ENSMUSG00000091639
chr9	31800000	31899999	1.06323	3.90177	ENSMUSG00000093088
chr9	32200000	32299999	0.298209	-3.96891	ENSMUSG00000016087 ENSMUSG00000064492
chr9	33900000	33999999	-0.682725	3.92487
chr9	3500000	3599999	-0.2686	4.32333
chr9	36900000	36999999	1.22861	4.61383	ENSMUSG00000077483
chr9	49200000	49299999	0.144154	3.84525	ENSMUSG00000032257 ENSMUSG00000040219
chr9	49300000	49399999	0.157072	3.98231	ENSMUSG00000079564 ENSMUSG00000090896
chr9	49500000	49599999	0.307741	4.73094
chr9	49600000	49699999	0.414638	5.59581	ENSMUSG00000064534
chr9	49700000	49799999	0.443642	5.39543
chr9	49800000	49899999	0.279665	4.5857
chr9	49900000	49999999	0.305433	4.78879
chr9	50100000	50199999	0.322656	4.65786	ENSMUSG00000058443
chr9	50300000	50399999	1.10548	4.04337	ENSMUSG00000032068 ENSMUSG00000032067 ENSMUSG00000032066 ENSMUSG00000032065 ENSMUSG00000039217
chr9	53900000	53999999	-0.359539	-3.78585
chr9	60900000	60999999	0.69637	4.30889
chr9	61000000	61099999	0.740011	4.5247
chr9	61100000	61199999	1.0737	5.13736
chr9	61200000	61299999	1.05507	5.04443	ENSMUSG00000074256 ENSMUSG00000032280
chr9	61300000	61399999	0.804048	5.34095
chr9	61400000	61499999	0.805627	6.24272
chr9	61500000	61599999	0.680158	5.89167
chr9	61600000	61699999	0.841735	4.92537
chr9	61700000	61799999	1.17259	5.99295	ENSMUSG00000007892 ENSMUSG00000032254
chr9	67600000	67699999	0.606883	4.1956	ENSMUSG00000055125 ENSMUSG00000091956 ENSMUSG00000047990
chr9	67700000	67799999	0.246915	3.89112	ENSMUSG00000035284
chr9	69000000	69099999	0.350552	-3.72581
chr9	70900000	70999999	0.445997	3.78745	ENSMUSG00000032204
chr9	71100000	71199999	0.427356	7.20874	ENSMUSG00000013584
chr9	72100000	72199999	1.13591	4.75717	ENSMUSG00000089530 ENSMUSG00000038535
chr9	72600000	72699999	1.24977	6.88032
chr9	72700000	72799999	1.36422	7.16451	ENSMUSG00000036030 ENSMUSG00000034910
chr9	73000000	73099999	0.667244	5.46289	ENSMUSG00000066478
chr9	73100000	73199999	0.163563	4.63466
chr9	73900000	73999999	-0.597176	3.83922	ENSMUSG00000064744
chr9	75600000	75699999	0.145161	3.93749	ENSMUSG00000032179
chr9	77900000	77999999	1.26405	4.64354	ENSMUSG00000023333 ENSMUSG00000001366 ENSMUSG00000009828
chr9	78000000	78099999	1.1881	4.37696	ENSMUSG00000065037 ENSMUSG00000087566 ENSMUSG00000032348 ENSMUSG00000074183 ENSMUSG00000069620
chr9	79500000	79599999	-0.243064	-4.6402	ENSMUSG00000032332 ENSMUSG00000086608
chr9	79600000	79699999	0.00486013	-6.54099	ENSMUSG00000032330 ENSMUSG00000032328 ENSMUSG00000086918 ENSMUSG00000092565
chr9	79700000	79799999	-0.0650059	-6.7081	ENSMUSG00000034898 ENSMUSG00000092581
chr9	79800000	79899999	0.144085	-5.75393	ENSMUSG00000088908
chr9	79900000	79999999	0.378136	-4.42695	ENSMUSG00000034252 ENSMUSG00000084917
chr9	80600000	80699999	-1.07036	-4.52573
chr9	81400000	81499999	-1.16673	-4.3058
chr9	91500000	91599999	-1.09685	-4.28608
chr9	91800000	91899999	-1.121	-4.8398
chr9	91900000	91999999	-0.988145	-5.61925
chr9	92000000	92099999	-1.00608	-5.72817
chr9	92100000	92199999	-0.817413	-4.08003	ENSMUSG00000032369 ENSMUSG00000032372

## Sheet: DIVERGENCE CLUSTERS
Large Region - Human	Chromosome	Start	End		Large Region - Mouse	Chromosome	Start	End
1	chr6	168200000	170899999	2699999	1	chr1	107400000	107799999
2	chr2	239600000	241999999	2399999	2	chr1	92000000	92399999
3	chr9	136600000	138699999	2099999	3	chr10	114000000	114399999
4	chr15	55200000	56999999	1799999	4	chr10	124700000	125199999
5	chr18	76300000	77899999	1599999	5	chr10	27000000	27399999
6	chr8	124500000	126099999	1599999	6	chr10	69600000	70199999
7	chr16	54000000	55499999	1499999	7	chr11	46600000	46999999
8	chr18	20300000	21799999	1499999	8	chr11	54000000	54699999
9	chr3	190700000	192099999	1399999	9	chr11	66600000	66999999
10	chr5	87000000	88399999	1399999	10	chr11	86700000	87199999
11	chr2	167800000	169099999	1299999	11	chr11	89000000	89399999
12	chr3	126700000	127999999	1299999	12	chr12	111100000	111499999
13	chr6	160800000	162099999	1299999	13	chr12	120200000	120799999
14	chr8	72400000	73699999	1299999	14	chr12	59000000	59499999
15	chr2	76400000	77599999	1199999	15	chr13	13700000	14599999
16	chr4	89600000	90799999	1199999	16	chr13	48100000	48499999
17	chr5	78200000	79399999	1199999	17	chr13	85400000	85999999
18	chr1	115900000	116999999	1099999	18	chr13	89800000	90199999
19	chr10	131200000	132299999	1099999	19	chr14	11200000	11699999
20	chr11	12700000	13799999	1099999	20	chr14	32600000	33499999
21	chr12	106100000	107199999	1099999	21	chr14	64800000	65199999
22	chr2	63200000	64299999	1099999	22	chr14	71100000	71499999
23	chr4	23900000	24999999	1099999	23	chr14	72600000	73099999
24	chr6	163200000	164299999	1099999	24	chr15	29200000	29699999
25	chr10	115200000	116199999	999999	25	chr16	41900000	42299999
26	chr11	112300000	113299999	999999	26	chr17	52100000	52599999
27	chr14	31900000	32899999	999999	27	chr17	78200000	78599999
28	chr15	69700000	70699999	999999	28	chr18	15600000	16299999
29	chr18	73700000	74699999	999999	29	chr19	35400000	35899999
30	chr19	30200000	31199999	999999	30	chr19	55000000	55399999
31	chr20	41600000	42599999	999999	31	chr2	116600000	116999999
32	chr3	193200000	194199999	999999	32	chr2	131500000	131899999
33	chr5	37900000	38899999	999999	33	chr2	139000000	139399999
34	chr5	130500000	131499999	999999	34	chr2	93600000	93999999
35	chr7	7500000	8499999	999999	35	chr3	102500000	102999999
36	chr11	17900000	18799999	899999	36	chr3	149100000	149499999
37	chr13	111900000	112799999	899999	37	chr3	25000000	25599999
38	chr15	35000000	35899999	899999	38	chr3	63200000	63599999
39	chr16	48300000	49199999	899999	39	chr4	153800000	154199999
40	chr3	172700000	173599999	899999	40	chr5	142500000	143099999
41	chr5	80000000	80899999	899999	41	chr5	19200000	19599999
42	chr6	100600000	101499999	899999	42	chr5	42000000	42399999
43	chr7	4100000	4999999	899999	43	chr5	64800000	65199999
44	chr10	60800000	61599999	799999	44	chr5	75200000	75699999
45	chr10	123800000	124599999	799999	45	chr5	82100000	82499999
46	chr10	126900000	127699999	799999	46	chr6	100000000	100499999
47	chr11	5900000	6699999	799999	47	chr6	25600000	26299999
48	chr18	4100000	4899999	799999	48	chr6	49700000	50199999
49	chr2	166200000	166999999	799999	49	chr6	64000000	64399999
50	chr4	16600000	17399999	799999	50	chr6	97400000	97799999
51	chr4	147300000	148099999	799999	51	chr7	53800000	54399999
52	chr5	7100000	7899999	799999	52	chr8	106700000	107099999
53	chr5	146700000	147499999	799999	53	chr8	110100000	110499999
54	chr6	114200000	114999999	799999	54	chr8	30000000	30399999
55	chr7	26400000	27199999	799999	55	chr8	36400000	36799999
56	chr7	94500000	95299999	799999	56	chr9	102900000	103299999
57	chr7	141100000	141899999	799999	57	chr9	91800000	92199999
58	chr8	59300000	60099999	799999	58	chr1	79100000	79699999
59	chr1	178700000	179399999	699999	59	chr10	50100000	50999999
60	chr10	6400000	7099999	699999	60	chr10	53100000	53799999
61	chr10	14700000	15399999	699999	61	chr11	21100000	21999999
62	chr12	78800000	79499999	699999	62	chr11	36400000	36899999
63	chr14	88500000	89199999	699999	63	chr11	67600000	68099999
64	chr14	95300000	95999999	699999	64	chr12	11300000	11799999
65	chr16	50700000	51399999	699999	65	chr13	37500000	37999999
66	chr17	56800000	57499999	699999	66	chr13	56100000	56699999
67	chr19	32500000	33199999	699999	67	chr13	90800000	91299999
68	chr2	71900000	72599999	699999	68	chr13	91700000	93099999
69	chr20	19500000	20199999	699999	69	chr14	19200000	19799999
70	chr3	17600000	18299999	699999	70	chr14	87700000	88199999
71	chr4	54600000	55299999	699999	71	chr16	30500000	30999999
72	chr4	93000000	93699999	699999	72	chr16	75000000	75499999
73	chr4	182600000	183299999	699999	73	chr18	47800000	48299999
74	chr5	73100000	73799999	699999	74	chr19	14300000	14799999
75	chr5	93300000	93999999	699999	75	chr19	43300000	43799999
76	chr5	134600000	135299999	699999	76	chr2	162300000	163099999
77	chr5	168200000	168899999	699999	77	chr2	3000000	3599999
78	chr6	94300000	94999999	699999	78	chr2	53700000	54199999
79	chr6	119000000	119699999	699999	79	chr2	57400000	57899999
80	chr7	124400000	125099999	699999	80	chr3	137300000	137799999
81	chr1	115100000	115699999	599999	81	chr3	22800000	23399999
82	chr10	100800000	101399999	599999	82	chr4	15500000	16099999
83	chr12	59500000	60099999	599999	83	chr4	23600000	24099999
84	chr13	44400000	44999999	599999	84	chr5	14300000	14799999
85	chr13	60200000	60799999	599999	85	chr6	4800000	5499999
86	chr17	9100000	9699999	599999	86	chr6	55700000	56199999
87	chr18	24500000	25099999	599999	87	chr6	62800000	63599999
88	chr2	157600000	158199999	599999	88	chr7	36300000	36899999
89	chr2	200800000	201399999	599999	89	chr8	11800000	12499999
90	chr20	51000000	51599999	599999	90	chr8	89200000	89899999
91	chr3	23200000	23799999	599999	91	chr9	72100000	73199999
92	chr3	62500000	63099999	599999	92	chr9	79500000	79999999
93	chr3	72200000	72799999	599999	93	chr1	158300000	158899999
94	chr3	75900000	76499999	599999	94	chr1	57400000	58099999
95	chr3	148700000	149299999	599999	95	chr11	34800000	35399999
96	chr4	100500000	101099999	599999	96	chr12	105700000	106299999
97	chr5	12200000	12799999	599999	97	chr12	99500000	100099999
98	chr5	18300000	18899999	599999	98	chr13	68700000	69399999
99	chr6	75800000	76399999	599999	99	chr13	77200000	77999999
100	chr7	20100000	20699999	599999	100	chr14	13300000	13899999
101	chr7	24200000	24799999	599999	101	chr14	76900000	77499999
102	chr7	119900000	120499999	599999	102	chr14	87000000	87599999
103	chr8	90800000	91399999	599999	103	chr15	23900000	24499999
104	chr9	76500000	77099999	599999	104	chr17	11900000	12699999
105	chr10	113700000	114199999	499999	105	chr17	51200000	51799999
106	chr11	43700000	44199999	499999	106	chr17	70000000	70699999
107	chr13	49600000	50099999	499999	107	chr18	82700000	83499999
108	chr13	60900000	61399999	499999	108	chr19	19200000	19799999
109	chr14	38400000	38899999	499999	109	chr2	145300000	145899999
110	chr15	38100000	38599999	499999	110	chr2	168900000	169499999
111	chr17	10400000	10899999	499999	111	chr2	27100000	28099999
112	chr2	17400000	17899999	499999	112	chr3	25700000	26699999
113	chr2	154100000	154599999	499999	113	chr4	27600000	28499999
114	chr2	224200000	224699999	499999	114	chr6	21200000	21799999
115	chr3	173700000	174199999	499999	115	chr6	40100000	40799999
116	chr3	175800000	176299999	499999	116	chr6	51500000	52199999
117	chr3	194300000	194799999	499999	117	chr6	84100000	84699999
118	chr4	38200000	38699999	499999	118	chr7	137700000	138399999
119	chr5	81300000	81799999	499999	119	chr7	140400000	141099999
120	chr5	82400000	82899999	499999	120	chr8	80500000	81199999
121	chr5	86100000	86599999	499999	121	chr1	14400000	15499999
122	chr5	116200000	116699999	499999	122	chr1	93600000	95199999
123	chr5	166600000	167099999	499999	123	chr10	108200000	108899999
124	chr6	6700000	7199999	499999	124	chr12	53100000	53899999
125	chr6	19500000	19999999	499999	125	chr13	98100000	98799999
126	chr6	97900000	98399999	499999	126	chr2	10600000	11299999
127	chr6	129100000	129599999	499999	127	chr2	113800000	114499999
128	chr7	31500000	31999999	499999	128	chr2	65600000	66299999
129	chr7	82500000	82999999	499999	129	chr4	6100000	6999999
130	chr9	82100000	82599999	499999	130	chr5	52000000	52899999
131	chr1	2800000	3199999	399999	131	chr6	57700000	60799999
132	chr1	81400000	81799999	399999	132	chr6	8100000	8899999
133	chr10	91900000	92299999	399999	133	chr8	49700000	50399999
134	chr12	72500000	72899999	399999	134	chr8	91100000	91799999
135	chr14	101600000	101999999	399999	135	chr10	35800000	36799999
136	chr16	66500000	66899999	399999	136	chr15	6800000	7699999
137	chr16	73900000	74299999	399999	137	chr16	29500000	30399999
138	chr17	54400000	54799999	399999	138	chr18	43400000	44199999
139	chr18	59700000	60099999	399999	139	chr19	56300000	57099999
140	chr2	36200000	36599999	399999	140	chr5	44900000	45699999
141	chr2	237400000	237799999	399999	141	chr6	88300000	89299999
142	chr20	4400000	4799999	399999	142	chr7	112200000	112999999
143	chr20	12700000	13099999	399999	143	chr7	144000000	144899999
144	chr3	18600000	18999999	399999	144	chr9	49200000	50199999
145	chr3	60500000	60899999	399999	145	chr10	83500000	84399999
146	chr3	69400000	69799999	399999	146	chr15	58000000	59199999
147	chr3	115400000	115799999	399999	147	chr17	10100000	10999999
148	chr3	133300000	133699999	399999	148	chr17	12900000	15699999
149	chr3	146200000	146599999	399999	149	chr18	80300000	81499999
150	chr3	154900000	155299999	399999	150	chr3	101300000	102199999
151	chr4	13400000	13799999	399999	151	chr6	80100000	81299999
152	chr4	62800000	63199999	399999	152	chr7	119800000	120799999
153	chr4	94100000	94499999	399999	153	chr7	38100000	38999999
154	chr5	156000000	156399999	399999	154	chr9	60900000	61799999
155	chr7	78200000	78599999	399999	155	chr2	67100000	68299999
156	chr8	8600000	8999999	399999	156	chr13	93500000	94599999
157	chr8	9800000	10199999	399999	157	chr13	83400000	84999999
158	chr8	21400000	21799999	399999	158	chr16	27100000	28399999
159	chr8	35000000	35399999	399999	159	chr8	94100000	95299999
					160	chr18	11600000	12999999
