# Supplementary material for: Divergence of Mammalian Higher Order Chromatin Structure Is Associated with Developmental Loci
Source: PLoS Comput Biol. 2013 Apr 4;9(4):e1003017. doi: 10.1371/journal.pcbi.1003017 (PMC3617018; doi:10.1371/journal.pcbi.1003017)
Supplement: Table S4 — Enrichment of divergence clusters at subtelomeric regions. Results of permutation tests (see Methods) assessing the significance of observed relative to expected numbers of divergence clusters at a variety of proximities (1 Mb, 5 Mb, 10 Mb) to telomeres in human and mouse genomes. Significant (p<0.05) enrichments (labelled E) or depletions (labelled D) in observed relative to expected numbers are highlighted in yellow. (XLS) [file pcbi.1003017.s011.xls]

## Sheet: SUBTELOMERIC REGIONS
hg19	Obs_1Mb	Exp_1Mb	Enrich_1Mb	p_val_1Mb	Obs_5Mb	Exp_5Mb	Enrich_5Mb	p_val_5Mb	Obs_10Mb	Exp_10Mb	Enrich_10Mb	p_val_10Mb
1	0	0	D	0.9999	7	2.06	E	0.0346	12	6.02	E	0.1606
2	0	0.79	D	0.6842	10	3.24	E	0.0685	21	8.7	E	0.0096
3	0	1.8	D	0.4848	13	9.69	E	0.3539	25	19.34	E	0.3033
4	2	1.09	E	0.2551	6	6.74	D	0.5528	16	11.97	E	0.2239
5	0	0.73	D	0.6909	2	7.42	D	0.2405	14	15.26	D	0.632
6	1	0.8	E	0.3103	9	4.55	E	0.1465	29	11.74	E	0.034
7	2	1.22	E	0.3313	11	8.35	E	0.3328	19	15.9	E	0.3192
8	0	0.57	D	0.7751	0	3.87	D	0.2585	6	7.77	D	0.3503
9	0	0.79	D	0.6623	11	5.57	E	0.1742	15	10.1	E	0.2234
10	0	1.96	D	0.3815	14	11.01	E	0.2741	32	21.73	E	0.1067
11	1	1.14	D	0.731	8	6.51	E	0.3202	23	12.66	E	0.1593
12	2	0.66	E	0.1473	3	3.45	D	0.5793	3	5.64	D	0.3061
13	0	0.13	D	0.9089	6	0.89	E	0.0408	6	3.4	E	0.2794
14	0	0	D	0.9999	1	2.13	D	0.5345	7	5.43	E	0.3565
15	1	0.52	E	0.2863	4	3.07	E	0.2882	5	6.97	D	0.4132
16	0	1.26	D	0.5472	5	5.97	D	0.7573	7	13.04	D	0.3045
17	1	0.72	E	0.3171	7	4.81	E	0.3824	16	10.56	E	0.2519
18	9	1.72	E	0.0396	25	7.78	E	0.0132	29	16.92	E	0.2063
19	0	0.32	D	0.8276	1	2.02	D	0.5718	1	4.32	D	0.2927
20	1	1.38	D	0.6993	6	6.09	D	0.7581	13	13.17	D	0.6399
21	0	0.12	D	0.8965	1	0.61	E	0.4216	2	1.24	E	0.3997
22	0	0.23	D	0.8139	2	1.18	E	0.3309	4	2.17	E	0.266
Total	20	17.95	E	0.389	152	106.99	E	0.0161	305	224.04	E	0.0048
mm9
	Obs_1Mb	Exp_1Mb	Enrich_1Mb	p_val_1Mb	Obs_5Mb	Exp_5Mb	Enrich_5Mb	p_val_5Mb	Obs_10Mb	Exp_10Mb	Enrich_10Mb	p_val_10Mb
1	0	0	D	0.9999	0	0	D	0.9999	0	1.09	D	0.5483
2	0	0.43	D	0.7814	1	3.53	D	0.4107	4	5.27	D	0.4895
3	0	0.27	D	0.8398	4	2.33	E	0.2824	4	5.46	D	0.4979
4	0	0	D	0.9999	4	1.86	E	0.1973	7	4.39	E	0.3056
5	1	1.05	D	0.7092	4	3.45	E	0.4632	8	6.82	E	0.402
6	0	0.13	D	0.867	1	3.08	D	0.4834	6	7.92	D	0.5229
7	9	6.77	E	0.3249	24	11.7	E	0.1121	31	16.91	E	0.1843
8	0	2.01	D	0.4829	1	3.16	D	0.4541	4	6.67	D	0.5019
9	0	0.24	D	0.8454	1	1.69	D	0.6112	4	4.93	D	0.521
10	0	0	D	0.9999	0	2.22	D	0.3546	4	5.41	D	0.4391
11	2	1.51	E	0.3727	5	4.48	E	0.4885	9	8.54	E	0.5439
12	4	1.54	E	0.1803	4	2.91	E	0.3652	9	6.24	E	0.2912
13	0	0.97	D	0.6233	0	5.66	D	0.1219	5	13.24	D	0.156
14	0	0.81	D	0.6786	1	4.44	D	0.4055	1	9.09	D	0.2697
15	0	0.2	D	0.8735	1	2.4	D	0.5494	5	5.08	D	0.6387
16	0	0.34	D	0.8176	1	2.67	D	0.5684	2	6.34	D	0.3814
17	0	0.85	D	0.6923	2	4.09	D	0.4589	3	9.73	D	0.2559
18	0	0.45	D	0.7757	2	4.29	D	0.4438	16	8.52	E	0.2021
19	0	0.68	D	0.6901	11	5.54	E	0.0863	18	11.37	E	0.1071
Total	16	18.24	D	0.4538	67	69.5	D	0.4757	140	143.01	D	0.4764

## Sheet: CENTROMERIC REGIONS
hg19	Obs_1Mb	Exp_1Mb	Enrich_1Mb	p_val_1Mb	Obs_5Mb	Exp_5Mb	Enrich_5Mb	p_val_5Mb	Obs_10Mb	Exp_10Mb	Enrich_10Mb	p_val_10Mb
1	0	0	D	0.9999	7	2.03	E	0.032	16	4.39	E	0.0221
2	1	0.61	E	0.272	8	4.09	E	0.1918	11	11.86	D	0.5193
3	1	3.69	D	0.4274	2	9.77	D	0.172	4	19.17	D	0.0332
4	3	1.8	E	0.306	8	7.02	E	0.419	12	13.54	D	0.4983
5	0	2.52	D	0.3598	3	9.46	D	0.1949	14	21.05	D	0.2983
6	0	1.47	D	0.5494	2	6.53	D	0.2708	6	13.64	D	0.1091
7	0	0	D	0.9999	2	1.77	E	0.4446	5	9.92	D	0.206
8	0	0.53	D	0.7882	0	3.14	D	0.3352	6	9.04	D	0.2718
9	0	0	D	0.9999	0	0	D	0.9999	0	0.67	D	0.7006
10	0	0.15	D	0.8487	4	6.13	D	0.4017	8	12.95	D	0.2127
11	0	0.38	D	0.7882	3	3.7	D	0.6163	9	10.29	D	0.6432
12	0	0.73	D	0.6879	1	2.81	D	0.466	5	7.51	D	0.4424
13	0	0.07	D	0.9265	5	1.46	E	0.132	6	3.03	E	0.232
14	0	0	D	0.9999	0	1.78	D	0.4499	0	5.27	D	0.1737
15	0	0	D	0.9999	0	0.26	D	0.8315	2	2.65	D	0.6354
16	0	0	D	0.9999	0	1.15	D	0.5623	5	5.14	D	0.7937
17	2	0.47	E	0.1212	2	3.59	D	0.4975	9	8.56	E	0.6082
18	0	1.28	D	0.5728	16	7.03	E	0.1782	22	16.53	E	0.3963
19	0	0.52	D	0.7674	14	4.41	E	0.0879	17	7.98	E	0.0782
20	0	0.75	D	0.6725	3	5.94	D	0.2108	9	13.48	D	0.1972
21	0	0	D	0.9999	2	0.67	E	0.1339	2	1.42	E	0.476
22	0	0.23	D	0.8108	1	0.84	E	0.5275	2	1.54	E	0.4492
mm9	Obs_1Mb	Exp_1Mb	Enrich_1Mb	p_val_1Mb	Obs_5Mb	Exp_5Mb	Enrich_5Mb	p_val_5Mb	Obs_10Mb	Exp_10Mb	Enrich_10Mb	p_val_10Mb
1	0	0	D	0.9999	0	1.25	D	0.503	0	3.21	D	0.1906
2	0	0	D	0.9999	8	2.06	E	0.054	11	6.63	E	0.2257
3	0	0	D	0.9999	0	0.45	D	0.784	2	3.42	D	0.528
4	0	0	D	0.9999	0	0.73	D	0.7328	7	3.29	E	0.2169
5	0	0	D	0.9999	2	1.25	E	0.3332	4	4.92	D	0.4476
6	0	0	D	0.9999	3	1.65	E	0.294	14	6.78	E	0.1658
7	0	0	D	0.9999	0	0.9	D	0.5964	1	1.43	D	0.6901
8	0	0	D	0.9999	0	0.55	D	0.772	0	4.86	D	0.143
9	0	0	D	0.9999	1	0.64	E	0.2962	1	2.87	D	0.4505
10	0	0	D	0.9999	3	1.54	E	0.259	6	5.44	E	0.4929
11	0	0	D	0.9999	0	1.55	D	0.4384	1	4.9	D	0.1551
12	0	0	D	0.9999	0	1.36	D	0.5229	2	5.5	D	0.2794
13	0	0	D	0.9999	0	0.84	D	0.6522	2	6.77	D	0.3122
14	0	0	D	0.9999	0	0	D	0.9999	0	0.96	D	0.6391
15	0	0	D	0.9999	0	0.57	D	0.7622	8	3.31	E	0.183
16	0	0	D	0.9999	1	1	D	0.8108	2	4.26	D	0.5622
17	0	0	D	0.9999	0	2.19	D	0.487	1	4.84	D	0.3046
18	0	0	D	0.9999	2	1.39	E	0.3024	4	5.15	D	0.602
19	0	0	D	0.9999	0	1.47	D	0.5175	0	5.01	D	0.1606
